# Supplementary material for: The role of spacer length and flexibility in peptide self-assembly
Source: publisher site journal article supplement (doi:10.3762/bjoc.22.77), 2026-06-25
Supplement: Additional file 1 [file 1860-5397-22-77-S1.pdf]

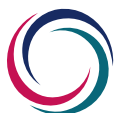

## Supporting Information

for

### The role of spacer length and flexibility in peptide self-assembly

Julian Link, Albin Lahu, Manfred Wagner, Tanja Weil and David Y. W. Ng

*Beilstein J. Org. Chem.* **2026**, 22, 986–996. [doi:10.3762/bjoc.22.77](https://doi.org/10.3762/bjoc.22.77)

### Experimental, characterization data and copies of spectra

## Table of contents

|        |                                                                                                                                                                                         |     |
|--------|-----------------------------------------------------------------------------------------------------------------------------------------------------------------------------------------|-----|
| 1      | Materials and instruments .....                                                                                                                                                         | S3  |
| 1.1    | Materials .....                                                                                                                                                                         | S3  |
| 1.2    | Instruments .....                                                                                                                                                                       | S3  |
| 1.2.1  | Microwave peptide synthesizer .....                                                                                                                                                     | S3  |
| 1.2.2  | Thin-layer chromatography (TLC) .....                                                                                                                                                   | S3  |
| 1.2.3  | High-performance liquid chromatography (HPLC).....                                                                                                                                      | S3  |
| 1.2.4  | Nuclear magnetic resonance spectroscopy (NMR) .....                                                                                                                                     | S4  |
| 1.2.5  | Liquid chromatography–mass spectrometry (LC–MS).....                                                                                                                                    | S4  |
| 1.2.6  | Self-assembly .....                                                                                                                                                                     | S4  |
| 1.2.7  | Proteostat <sup>®</sup> aggregation assay.....                                                                                                                                          | S4  |
| 1.2.8  | Thioflavin T (ThT) aggregation assay .....                                                                                                                                              | S5  |
| 1.2.9  | Transmission electron microscopy (TEM).....                                                                                                                                             | S5  |
| 1.2.10 | Atomic force microscopy (AFM) .....                                                                                                                                                     | S5  |
| 1.2.11 | Circular dichroism (CD) spectroscopy .....                                                                                                                                              | S5  |
| 1.2.12 | Assembly conversion rate determination .....                                                                                                                                            | S6  |
| 1.2.13 | Fluorescence microscopy .....                                                                                                                                                           | S6  |
| 1.2.14 | General procedure for automated peptide synthesis .....                                                                                                                                 | S6  |
| 1.2.15 | Purification of peptides .....                                                                                                                                                          | S7  |
| 2      | Synthesis.....                                                                                                                                                                          | S7  |
| 2.1    | Synthesis of small molecules.....                                                                                                                                                       | S7  |
| 2.1.1  | Synthesis of 4-piperidinyl-1,8-naphthalic anhydride .....                                                                                                                               | S8  |
| 2.1.2  | Synthesis of 6-(1,3-dioxo-6-(piperidin-1-yl)-1 <i>H</i> -benzo[ <i>de</i> ]isoquinolin-2(3 <i>H</i> )-yl) hexanoic acid (C <sub>6</sub> -Nap) .....                                     | S12 |
| 2.1.3  | Synthesis of 3-(1,3-dioxo-6-(piperidin-1-yl)-1 <i>H</i> -benzo[ <i>de</i> ]isoquinolin-2(3 <i>H</i> )-yl)-propanoic acid (C <sub>3</sub> -Nap).....                                     | S16 |
| 2.1.4  | Synthesis of (2 <i>S</i> ,3 <i>S</i> )-2-(1,3-dioxo-6-(piperidin-1-yl)-1 <i>H</i> -benzo[ <i>de</i> ]isoquinolin-2(3 <i>H</i> )-yl)-3-methylpentanoic acid (C <sub>0</sub> -Nap). ..... | S20 |
| 2.2    | Synthesis of peptides .....                                                                                                                                                             | S24 |
| 2.2.1  | Synthesis of C <sub>6</sub> -Nap-ICA .....                                                                                                                                              | S24 |

|       |                                                                               |     |
|-------|-------------------------------------------------------------------------------|-----|
| 2.2.2 | Synthesis of C <sub>3</sub> -Nap-ICA .....                                    | S26 |
| 2.2.3 | Synthesis of C <sub>0</sub> -Nap-ICA .....                                    | S29 |
| 3     | Self-assembly .....                                                           | S32 |
| 3.1   | Assembly conversion rate .....                                                | S32 |
| 3.2   | Thioflavin T (ThT) assay.....                                                 | S33 |
| 3.3   | Fluorescence microscopy, transmission electron and atomic force microscopy... | S34 |
| 3.4   | Circular dichroism (CD) spectroscopy .....                                    | S36 |
| 4     | NMR study with increasing TFE content.....                                    | S37 |
|       | References .....                                                              | S50 |

# 1 Materials and instruments

## 1.1 Materials

Reagents and solvents were purchased from commercial vendors and used without further purification. For the synthesis of peptides, peptide synthesis grade reagents were used. High performance liquid chromatography (HPLC) was performed using acetonitrile (ACN) in HPLC grade. MilliQ-H<sub>2</sub>O for HPLC and reactions was obtained from a Millipore purification system by Merck Millipore.

## 1.2 Instruments

### 1.2.1 Microwave peptide synthesizer

A LibertyBlue 2.0 automated microwave synthesizer from CEM Corporation was used to perform solid-phase peptide synthesis (SPPS). The system was purged with dimethylformamide (DMF) prior and during usage. Piperidine was used for deprotection of the peptide protecting groups and the used amino acids were dissolved in DMF. *N,N*-Diisopropylcarbodiimide (DIC) and ethyl cyanohydroxyiminoacetate (Oxyma Pure) were employed as coupling agents and dissolved in DMF as well.

### 1.2.2 Thin-layer chromatography (TLC)

The analysis of compounds by means of thin-layer chromatography (TLC) was performed using Alugram Sil G/UV<sub>254</sub> plates, by Macherey-Nagel. The analytes were detected by extinction of ultraviolet (UV) absorption at a wavelength of 254 nm and 365 nm or by staining of the TLC plate using potassium permanganate solution.

### 1.2.3 High-performance liquid chromatography (HPLC)

Peptides were purified by preparative HPLC using a setup from Shimadzu. For purification, a Phenomenex Gemini 5  $\mu\text{m}$  NX-C18 110 Å 150 × 30 mm column was used at a flow rate of 25 mL/min. All measurements and purification steps were performed using gradients of ACN and MilliQ-H<sub>2</sub>O, each acidified with 0.1% trifluoroacetic acid (TFA). The absorbance was recorded at wavelengths of 214 and 254 nm. For processing of the HPLC spectra, the software LabSolutions by Shimadzu and PowerPoint by Microsoft Corporation were used. Analytical measurements were performed on an Atlantis T3 column (4.6 × 100 mm, 5  $\mu\text{m}$ ) at a flowrate of 1 mL/min. All measurements and purification steps were performed using gradients of ACN and MilliQ-H<sub>2</sub>O, each acidified with 0.1% TFA. Absorbance was recorded at 214 and 254 nm wavelengths. The software LabSolutions by Shimadzu and PowerPoint by Microsoft Corporation were used to process the generated HPLC spectra.

#### 1.2.4 Nuclear magnetic resonance spectroscopy (NMR)

$^1\text{H}$  and  $^{13}\text{C}$  NMR-measurements were conducted with AVANCE NEO 400- and AVANCE 700-spectrometers by Bruker at 298 K in deuterated solvents. All deuterated solvents were used without further purification and purchased from Sigma Aldrich. The internal standards were set depending on the solvent used.

$\text{CHCl}_3$ :  $^1\text{H}$ :  $\delta = 7.26$  ppm,  $^{13}\text{C}$ :  $\delta = 77.16$  ppm;  $\text{DMSO-}d_6$ :  $^1\text{H}$ :  $\delta = 2.50$  ppm,  $^{13}\text{C}$ :  $\delta = 39.52$  ppm;  $\text{CF}_3\text{CHDOD}$ :  $^1\text{H}$ :  $\delta = 3.88$  ppm,  $^{13}\text{C}$ :  $\delta = 61.50, 126.30$  ppm.

The acquired data was processed using the software MestReNova 14.2.0 by Mestrelab Research. The chemical shifts  $\delta$  were indicated in parts per million (ppm). Multiplets were abbreviated as following: s = singlet, d = doublet, t = triplet, q = quartet, p = quintet, m = multiplet.

#### 1.2.5 Liquid chromatography–mass spectrometry (LC–MS)

Compounds were analyzed by HPLC–ESIMS on an LC–MS 2020 from Shimadzu using a Kinetex 2.6  $\mu\text{m}$  EVO  $\text{C}_{18}$  100 Å LC 50  $\times$  2.1 mm column. MilliQ- $\text{H}_2\text{O}$ , acidified with 0.1% formic acid, and ACN, acidified with 0.1% formic acid, were used as solvents for all measurements. The solvent gradient started with 5% ACN and 95% MilliQ- $\text{H}_2\text{O}$ . This solvent ratio was kept constant for 2 min, then the ACN content was linearly increased to 95% within 14 min. The generated data was processed with LabSolutions by Shimadzu and Origin Pro by OriginLab®.

#### 1.2.6 Self-assembly

The monomeric peptides were dissolved in 2,2,2-trifluoroethanol (TFE) at high concentrations (20/10 mM) before dilution using phosphate-buffered saline (PBS) buffer (50 mM, pH 7.4) with final TFE concentrations of 1%. The samples were incubated at room temperature for 24 h.

#### 1.2.7 Proteostat® aggregation assay

The peptide samples were assembled according to the general procedure. The Proteostat® Protein Aggregation Assay Kit was purchased from Enzo Life Sciences, Inc. 0.52  $\mu\text{L}$  of the Proteostat stock solution was diluted with 98.48  $\mu\text{L}$  MilliQ- $\text{H}_2\text{O}$  and 1.0  $\mu\text{L}$  assay buffer. 5  $\mu\text{L}$  of this solution was added to 45  $\mu\text{L}$  peptide solution in a Greiner 96 black well plate. The solutions were incubated in the dark at room temperature for 15 min while shaking at 500 rpm. The fluorescence intensity was measured with bandwidths of 20 nm and an excitation wavelength of  $\lambda_{\text{ex}} = 550$  nm as well as an emission wavelength of  $\lambda_{\text{em}} = 600$  nm. The experiment was repeated three times. Control measurements were performed by incubating Proteostat® solution similarly in PBS buffer (50 mM, pH 7.4, 1% TFE).

### **1.2.8 Thioflavin T (ThT) aggregation assay**

The peptide samples were assembled according to the general procedure. 50  $\mu$ M Thioflavin T (ThT) was added and the samples were incubated for 15 min at room temperature in the dark at 500 rpm. The fluorescence intensity was measured with bandwidths of 10 nm and an excitation wavelength of  $\lambda_{\text{ex}} = 450$  nm as well as an emission wavelength of  $\lambda_{\text{em}} = 482$  nm in a Greiner 96 well plate black. The experiment was repeated three times. Control measurements were performed by incubating ThT similarly in PBS buffer (50 mM, pH 7.4, 1% TFE).

### **1.2.9 Transmission electron microscopy (TEM)**

TEM images were recorded on a JEOL 1400 transmission electron microscope at a voltage of 120 kV. The images were visualized using the software ImageJ. Unless stated otherwise, all samples were prepared in PBS (50 mM, pH 7.4, 1% TFE) and incubated for 24 h at room temperature. The samples were applied to Formvar/carbon-film coated copper grids (300 mesh) by Plano GmbH. The TEM grids were prepared by covering the grid with a 3  $\mu$ L droplet of the sample solution and incubation for 5 minutes. The excess solution was removed and the grids were stained with 7  $\mu$ L uranyl(IV) acetate solution (4%) for 2.5 min. The TEM grids were washed three times with MilliQ-H<sub>2</sub>O and dried before being used for microscopy.

### **1.2.10 Atomic force microscopy (AFM)**

Atomic force microscopy (AFM) (Park NX20 and Bruker Dimension ICON) was employed to characterize the morphology of the system. The samples were assembled according to the general procedure in MilliQ-H<sub>2</sub>O (1% TFE) air-dried prior casting on freshly cleaved silicon wafers. Imaging was performed under tapping mode using a cantilever with a resonance frequency of 285 kHz and a spring constant of 42 N·m<sup>-1</sup>. The resulting AFM images were further processed and analyzed with Gwyddion 2.63.

### **1.2.11 Circular dichroism (CD) spectroscopy**

CD spectra were recorded on a JASCO J-1500 spectrometer in a 1 mm high precision cell by Hellma Analytics. The collected data was processed using Spectra Analysis by JASCO and Origin Pro by OriginLab®. Samples were prepared in 50 mM PBS buffer (pH 7.4) with peptide concentrations of 100  $\mu$ M and 1% TFE. The samples were incubated for 24 h at room temperature and the spectra were recorded at wavelengths from 185 nm to 300 nm with a bandwidth of 1 nm, data pitch of 0.2 nm, and scanning speed at 5 nm/min, while using 300  $\mu$ L of the prepared sample solution. The samples were measured three times and the collected spectra were averaged. Background measurements were performed using PBS buffer (50 mM, pH 7.4, 1% TFE, 300  $\mu$ L) and subtracted from the peptide spectra.

### 1.2.12 Assembly conversion rate determination

The monomeric peptides were dissolved in TFE at high concentrations (10 mM) before dilution to different concentrations using PBS (50 mM, pH 7.4) and methanol. The final peptide concentrations were 100  $\mu$ M in PBS (50 mM, pH 7.4, 1% TFE) and 100  $\mu$ M in MeOH (1% TFE). The samples were incubated at room temperature for 24 h. Then, the samples were filtered through a syringe filter (0.2  $\mu$ m) and diluted with an internal standard, tyramine (200  $\mu$ M in MeOH, 1:1, v/v).

Conversion rate measurements were performed on an Atlantis T3 column (4.6  $\times$  100 mm, 5  $\mu$ m) at a flowrate of 1 mL/min. All measurement steps were performed using gradients of ACN and MilliQ-H<sub>2</sub>O, each acidified with 0.1% TFA. The gradient started at 0% ACN content and was linearly increased to 100% over 24 min. Absorbance was recorded at 214 and 254 nm wavelengths. The software LabSolutions by Shimadzu and Origin Pro by OriginLab<sup>®</sup> were used to process the generated HPLC spectra.

### 1.2.13 Fluorescence microscopy

The samples were incubated according to the general procedure for self-assembly. Fluorescence images of the peptides were taken using a Keyence BZ-X810 fluorescence microscope with a 40 $\times$  LD PH lens. The fluorescence of the naphthalene moiety was analyzed using a GFP filter with the following wavelength settings:  $\lambda_{\text{ex}}$  = 470/40 nm,  $\lambda_{\text{em}}$  = 525/50 nm.

### 1.2.14 General procedure for automated peptide synthesis

Peptides were synthesized using the Fmoc-SPPS strategy [1], synthesizing the peptide from C- to N-terminus in a microwave-assisted peptide synthesizer on an Fmoc-L-Ala Clt-resin at scales of 0.10 mmol. Fmoc-L-Ala Clt-resin (0.10 mmol) was swollen in DMF (15 mL) at room temperature for one hour before transferring it into the peptide synthesizer. In the peptide synthesizer, DMF was removed through the draining process and DMF (3.5 mL) was added prior to the coupling. Prior to every coupling, the Fmoc-protecting group was cleaved by one deprotection step using a solution of 8% piperidine (DMF, 2.1 mL) for 80 s at 110  $^{\circ}$ C. The amino acids (0.5 M in DMF, 1.0 mL), DIC (0.75 M in DMF, 1.0 mL) and Oxyma Pure (0.26 M in DMF, 1.5 mL) were added to the resin and the solution was heated to 105  $^{\circ}$ C for 60 s and held at that temperature for 30 s. The reaction mixture was drained, the Fmoc group was removed as described before and washed three times with DMF. The following coupling steps were performed in the same way. The final deprotection was performed via addition of a solution of 8% piperidine (DMF, 2.1 mL) for 80 s at 110  $^{\circ}$ C. The resin solvent was drained and the resin was washed three times with DMF (4 mL each).

### 1.2.15 Purification of peptides

Crude peptide products were purified via HPLC. The crudes were dissolved in 20 mL of ACN/MilliQ-H<sub>2</sub>O 9:1 (v/v, 5% TFA) and filtered through a syringe filter (0.2 μm). For purification, a Phenomenex Gemini 5 μm NX-C18 110 Å 150 × 30 mm column was used at a flowrate of 25 mL/min. The gradient started at 0% ACN (0.1% TFA) and was linearly increased to 100% ACN (0.1% TFA) through the span of 25 min. Fractions were collected and detected by measurements of the absorbance at wavelengths of 214 and 254 nm. The compounds were then identified using LC-MS and NMR spectroscopy. The product fractions were collected in a round-bottomed flask (RBF) and narrowed down to 40 mL under reduced pressure. The residual solvents were removed via lyophilization overnight.

## 2 Synthesis

### 2.1 Synthesis of small molecules

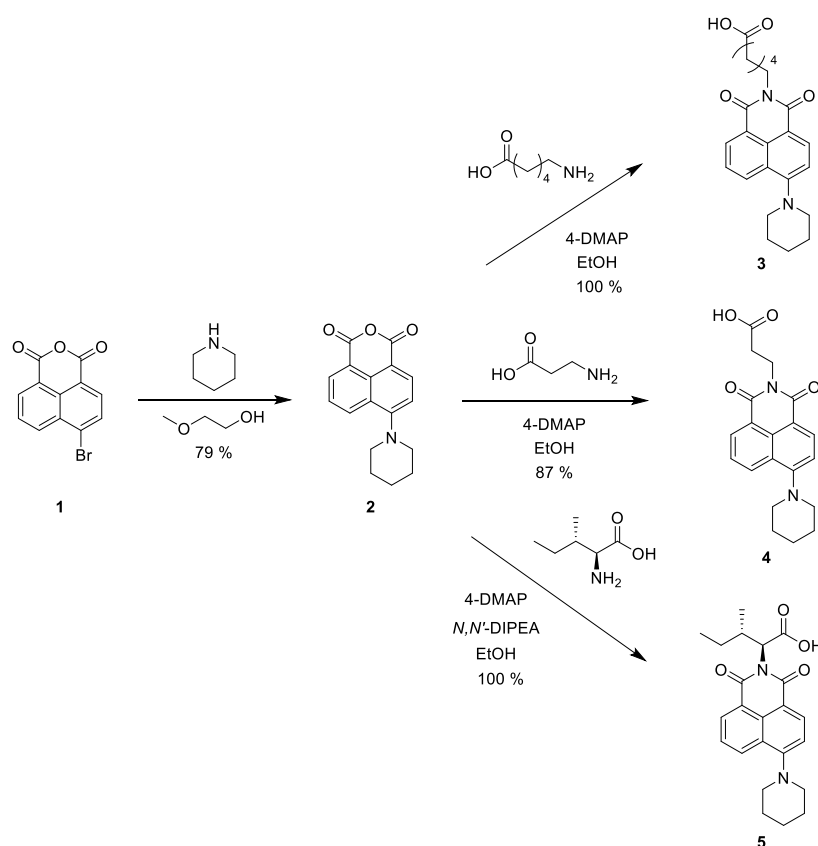

Scheme S1: Two-step synthesis of the naphthalene- $\pi$ -blocks C<sub>6</sub>-Nap **3**, C<sub>3</sub>-Nap **4** and C<sub>0</sub>-Nap **5** starting from 4-bromo-1,8-naphthalic anhydride (**1**).

### 2.1.1 Synthesis of 4-piperidinyl-1,8-naphthalic anhydride

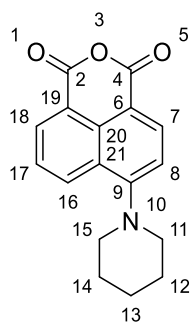

The synthesis was performed according to a general procedure by Li et al. [2] 4-Bromo-1,8-naphthalic anhydride (**1**, 1.00 g; 3.61 mmol; 1.0 equiv) was dissolved in 2-methoxyethanol (10 mL) and stirred for 10 min at room temperature. Then, piperidine (750  $\mu$ L; 7.22 mmol; 2.0 equiv) was added and the reaction mixture was stirred overnight under reflux conditions. The reaction mixture was cooled to room temperature. The suspension was further cooled in an ice bath and filtered. The orange solid was washed three times with small amounts of cold EtOH and the orange crude was recrystallized from EtOH. 4-Piperidinyl-1,8-naphthalic anhydride (**2**, 800 mg; 2.85 mmol; 79%) was obtained as orange crystals and used without further purification.

**LC-MS:** (pos.): calculated for  $[M + H]^+$ :  $m/z = 282.3$ ; measured:  $m/z = 282.1$ .

**R<sub>f</sub>:** 0.58 (DCM/MeOH = 9:1,  $v/v$ ).

**<sup>1</sup>H NMR, COSY** (400 MHz, CDCl<sub>3</sub>, 298 K):  $\delta$  [ppm] = 8.58 (dd, 1H,  $J = 7.3$  Hz, 1.2 Hz,  $H_{16}$ ); 8.50 (d, 1H,  $J = 8.2$  Hz,  $H_{18}$ ); 8.43 (dd, 1H,  $J = 8.5$  Hz, 1.2 Hz,  $H_7$ ); 7.71 (dd, 1H,  $J = 8.5$  Hz, 7.3 Hz,  $H_{17}$ ); 7.19 (d, 1H,  $J = 8.2$  Hz,  $H_8$ ); 3.33–3.25 (m, 4H,  $H_{11,15}$ ); 1.90 (p, 4H,  $J = 5.8$  Hz,  $H_{12,14}$ ); 1.75 (tq, 2H,  $J = 7.9$  Hz, 4.1 Hz,  $H_{13}$ ).

**<sup>13</sup>C NMR, HSQC, HMBC** (101 MHz, CDCl<sub>3</sub>, 298 K):  $\delta$  [ppm] = 161.7, 160.9, 158.6, 135.2, 133.3, 132.3, 125.8, 115.1, 54.5, 26.3, 24.4.

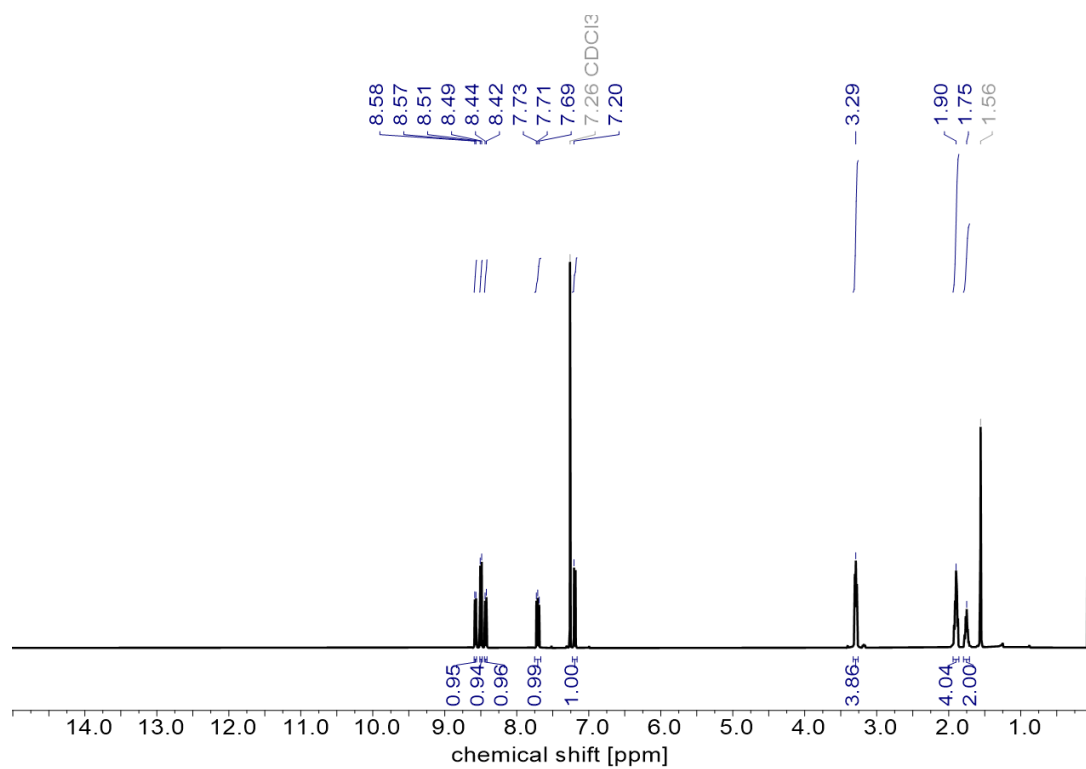

Figure S1: <sup>1</sup>H NMR spectrum (CDCl<sub>3</sub>, 400 MHz, 298 K) of 4-piperidinyl-1,8-naphthalic anhydride (**2**).

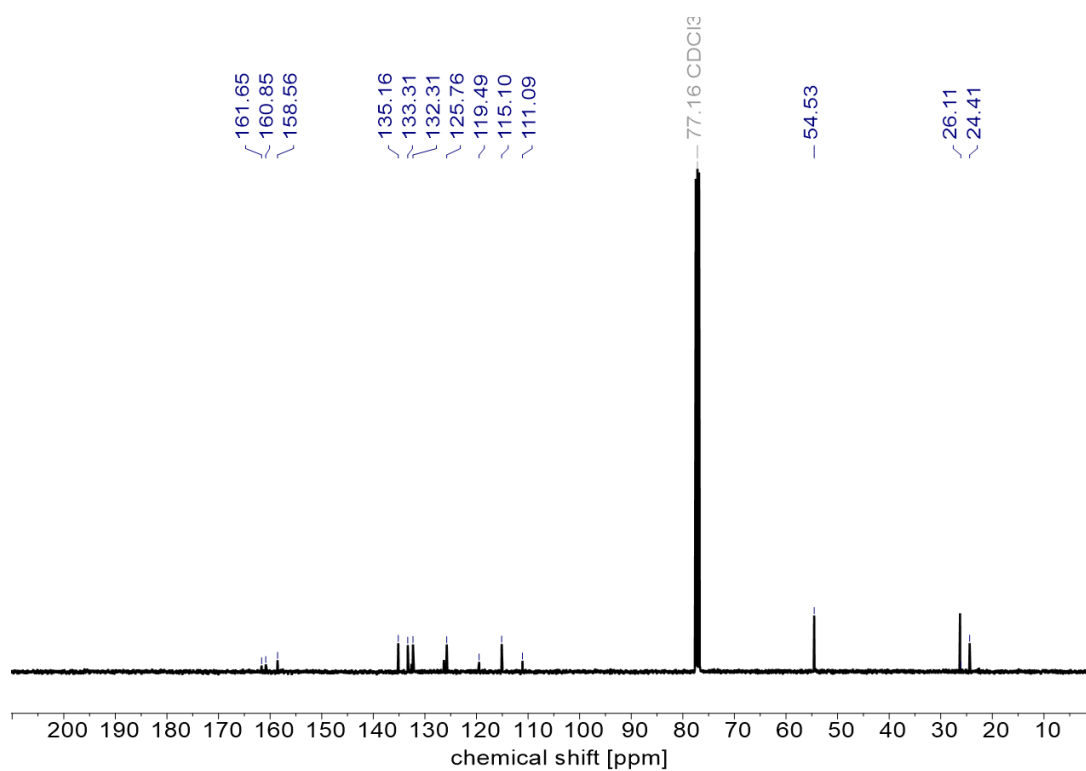

Figure S2: <sup>13</sup>C NMR spectrum (CDCl<sub>3</sub>, 101 MHz, 298 K) of 4-piperidinyl-1,8-naphthalic anhydride (**2**).

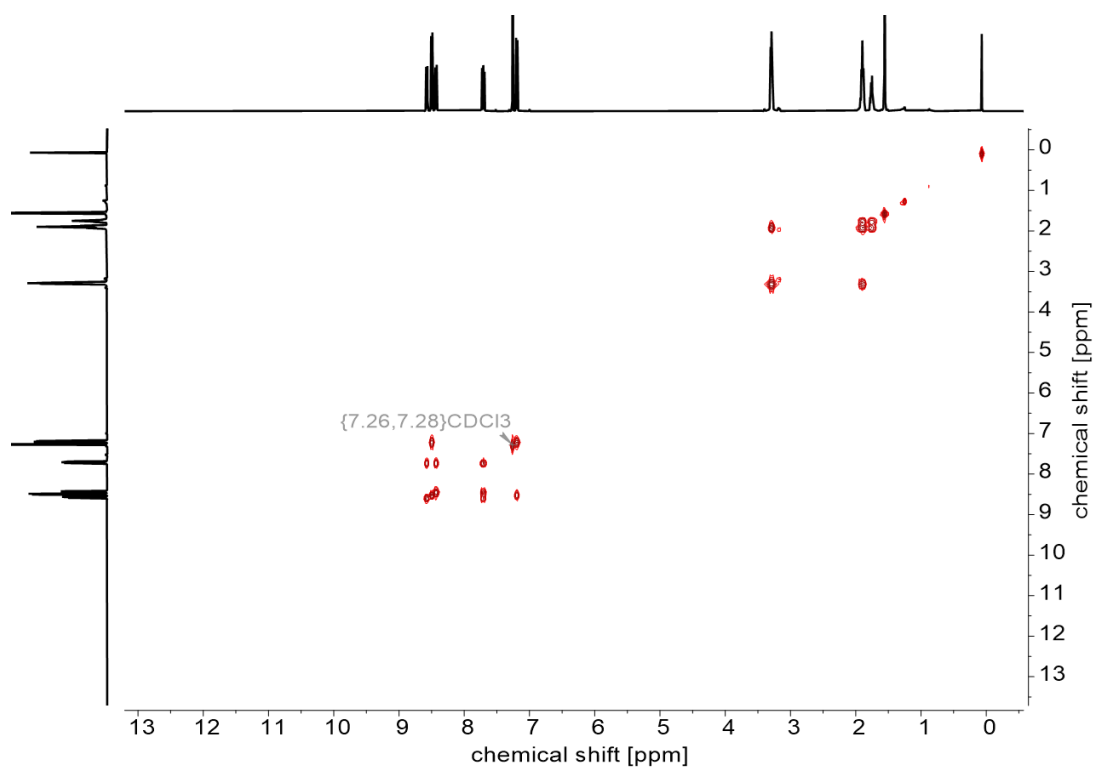

Figure S3:  $^1\text{H},^1\text{H}$ -COSY-NMR spectrum ( $\text{CDCl}_3$ , 400 MHz, 298 K) of 4-piperidinyl-1,8-naphthalic anhydride (**2**).

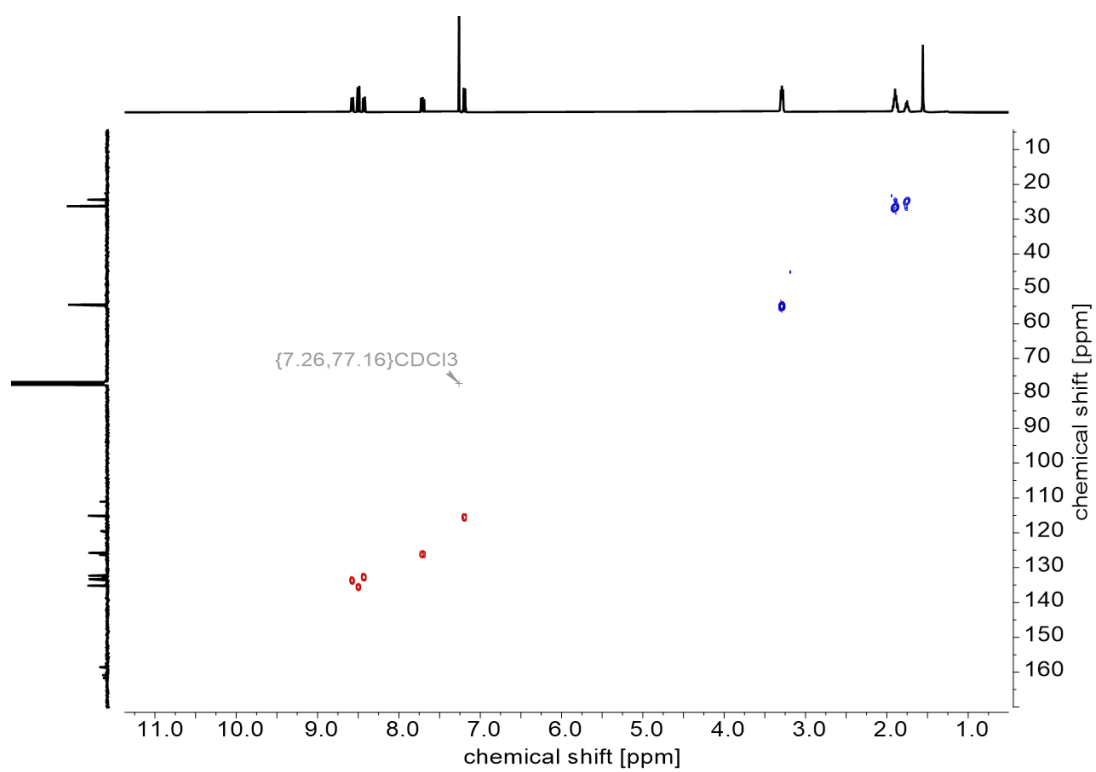

Figure S4:  $^1\text{H},^{13}\text{C}$ -HSQC-NMR spectrum ( $\text{CDCl}_3$ , 101 MHz, 298 K) of 4-piperidinyl-1,8-naphthalic anhydride (**2**).

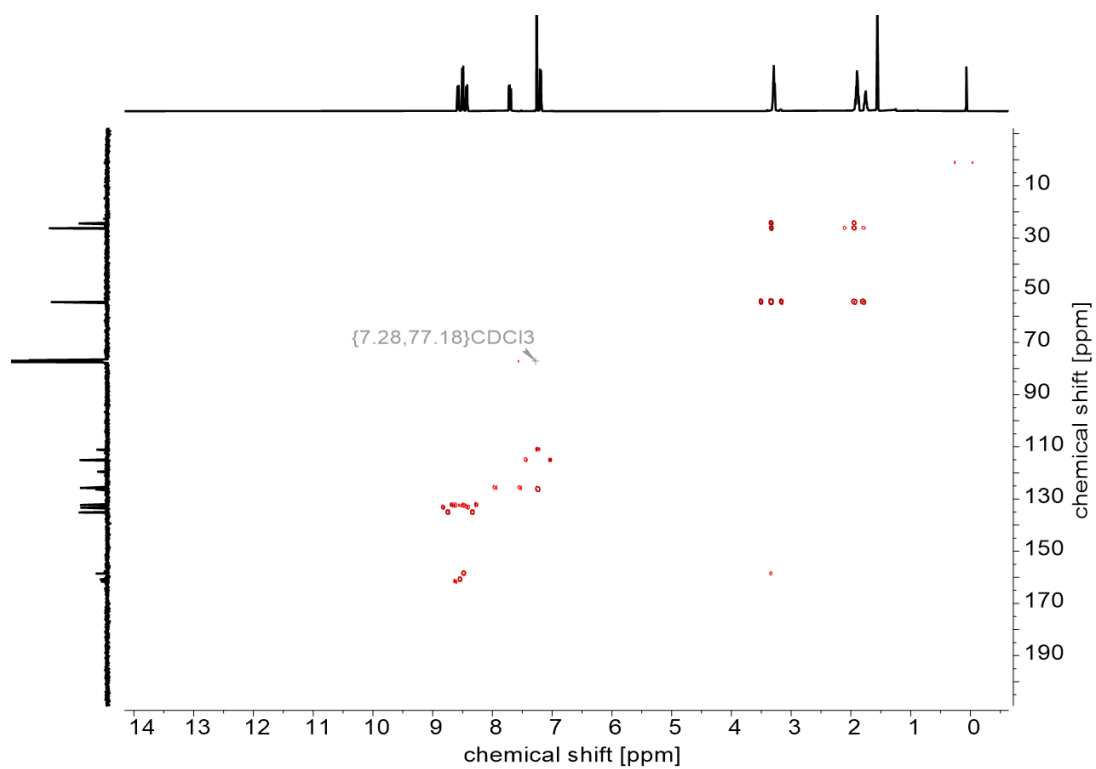

Figure S5:  $^1\text{H}$ ,  $^{13}\text{C}$ -HMBC-NMR spectrum ( $\text{CDCl}_3$ , 101 MHz, 298 K) of 4-piperidinyl-1,8-naphthalic anhydride (**2**).

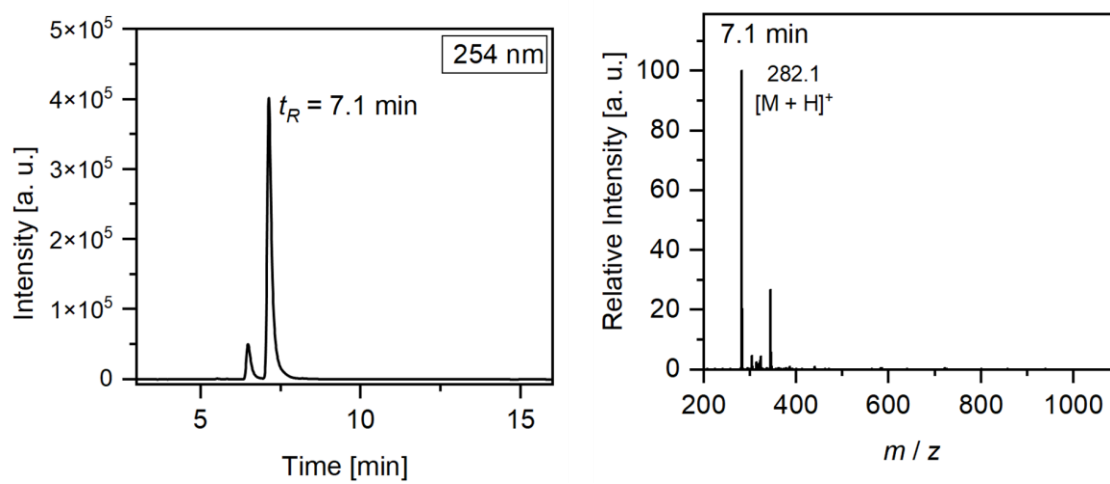

Figure S6: LC elugram (left, detection at 214 nm) and corresponding mass data (right) of 4-piperidinyl-1,8-naphthalic anhydride (**2**).

## 2.1.2 Synthesis of 6-(1,3-dioxo-6-(piperidin-1-yl)-1*H*-benzo[*de*]isoquinolin-2(3*H*)-yl)hexanoic acid (**C<sub>6</sub>-Nap**)

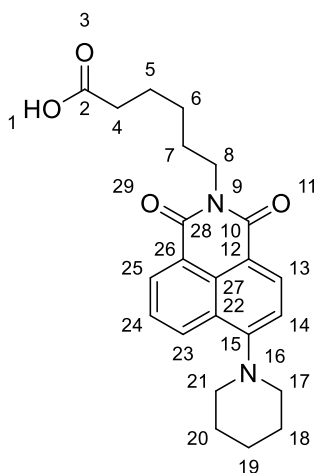

The synthesis was performed with a modified procedure referenced to Mata et al.[3] 4-Piperidinyl-1,8-naphthalic anhydride (**2**, 100 mg; 0.36 mmol; 1.0 equiv), 6-aminohexanoic acid (55 mg; 0.43 mmol; 1.2 equiv) and 4-DMAP (5 mg; 0.04 mmol; 0.1 equiv) were covered with EtOH (10 mL). The reaction mixture was stirred under reflux conditions for 24 h. Then, the mixture was diluted with DCM (10 mL). The solution was washed with 1 M HCl (3 × 5 mL) and brine (1 × 10 mL). The organic layer was dried over MgSO<sub>4</sub>, filtered and the solvents were removed under reduced pressure. **C<sub>6</sub>-Nap 3** (140 mg; 0.36 mmol; 100%) was obtained as a bright orange solid.

**LC-MS:** (pos.): calculated for [M + H]<sup>+</sup>:  $m/z$  = 395.5; measured:  $m/z$  = 395.2; calculated for [2 M + Na]<sup>+</sup>:  $m/z$  = 811.9; measured:  $m/z$  = 811.5.

**R<sub>f</sub>**: 0.15 (DCM/MeOH = 9:1, *v/v*, 1 % AcOH).

**<sup>1</sup>H NMR, COSY** (400 MHz, CDCl<sub>3</sub>, 298 K):  $\delta$  [ppm] = 8.57 (dd, 1H,  $J$  = 7.2 Hz, 1.2 Hz,  $H_{23}$ ); 8.49 (d, 1H,  $J$  = 8.1 Hz,  $H_{25}$ ); 8.39 (dd, 1H,  $J$  = 8.5 Hz, 1.3 Hz,  $H_{13}$ ); 7.67 (dd, 1H,  $J$  = 8.5 Hz, 7.3 Hz,  $H_{24}$ ); 7.17 (d, 1H,  $J$  = 8.2 Hz,  $H_{14}$ ); 4.21–4.13 (m, 2H,  $H_8$ ); 3.33–3.19 (m, 4H,  $H_{17,21}$ ); 2.38 (t, 2H,  $J$  = 7.5 Hz,  $H_4$ ); 1.88 (p, 4H,  $J$  = 5.8 Hz,  $H_{18,20}$ ); 1.82–1.66 (m, 6H,  $H_{5,7,19}$ ); 1.48 (tt, 2H,  $J$  = 9.9 Hz, 6.4 Hz,  $H_6$ ).

**<sup>13</sup>C NMR, HSQC, HMBC** (101 MHz, CDCl<sub>3</sub>, 298 K):  $\delta$  [ppm] = 157.5, 132.9, 131.2, 130.8, 126.4, 125.5, 123.3, 116.1, 114.9, 54.7, 53.6, 40.1, 33.7, 27.9, 26.7, 26.4, 24.6, 24.5.

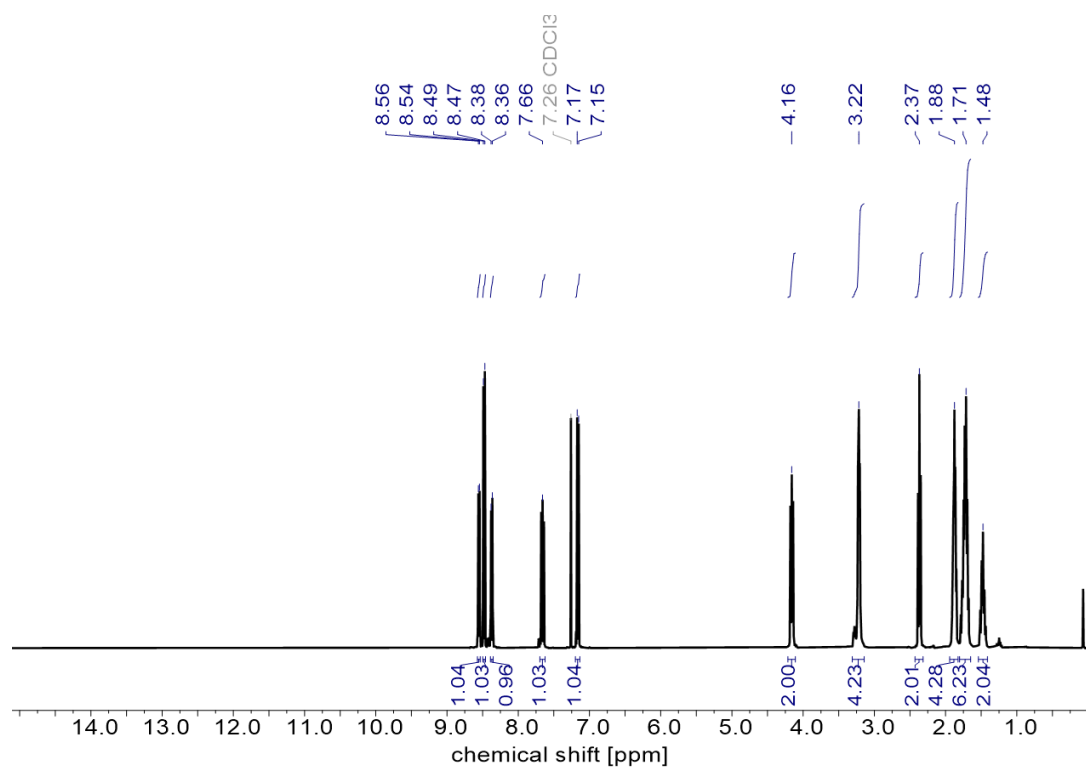

Figure S7: <sup>1</sup>H NMR spectrum (CDCl<sub>3</sub>, 400 MHz, 298 K) of C<sub>6</sub>-Nap **3**.

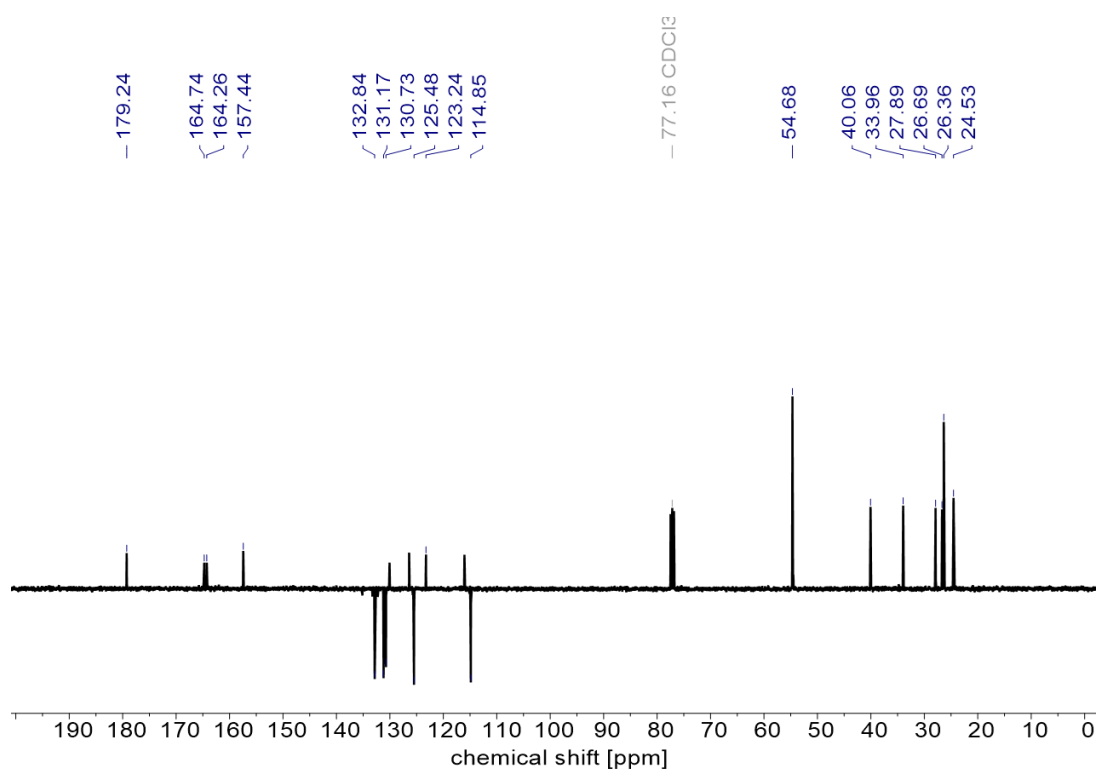

Figure S8: <sup>13</sup>C NMR spectrum (CDCl<sub>3</sub>, 101 MHz, 298 K) of C<sub>6</sub>-Nap **3**.

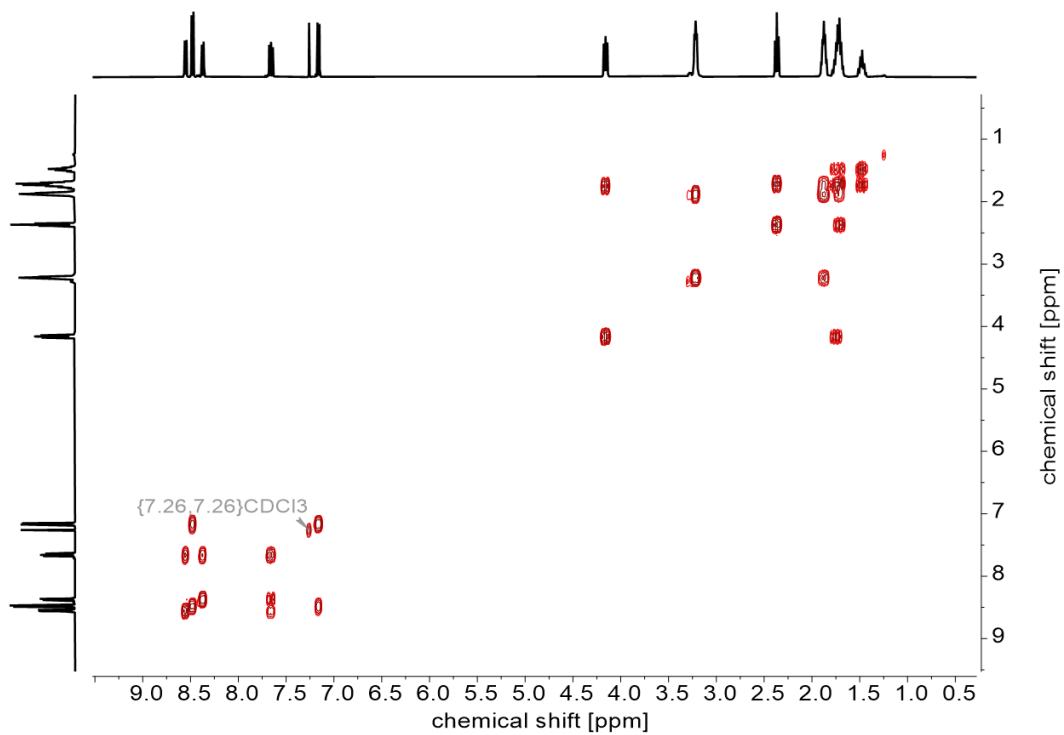

Figure S9:  $^1\text{H}, ^1\text{H}$ -COSY-NMR spectrum ( $\text{CDCl}_3$ , 400 MHz, 298 K) of  $\text{C}_6$ -Nap **3**.

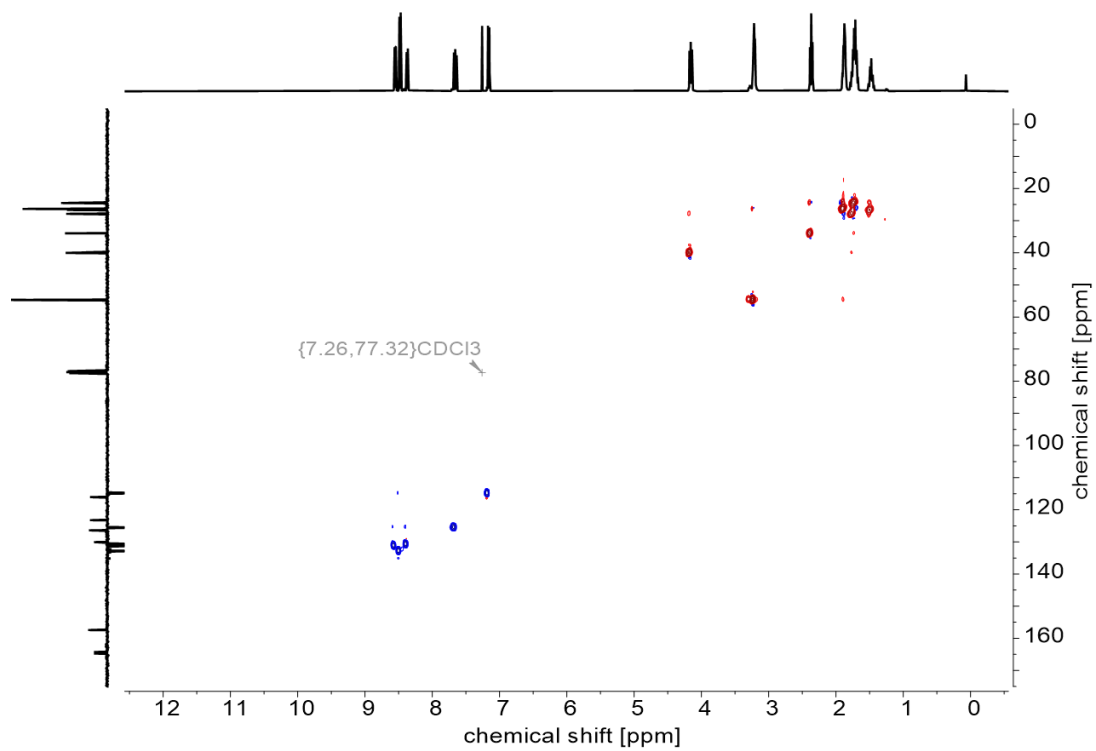

Figure S10:  $^1\text{H}, ^{13}\text{C}$ -HSQC-NMR spectrum ( $\text{CDCl}_3$ , 101 MHz, 298 K) of  $\text{C}_6$ -Nap **3**.

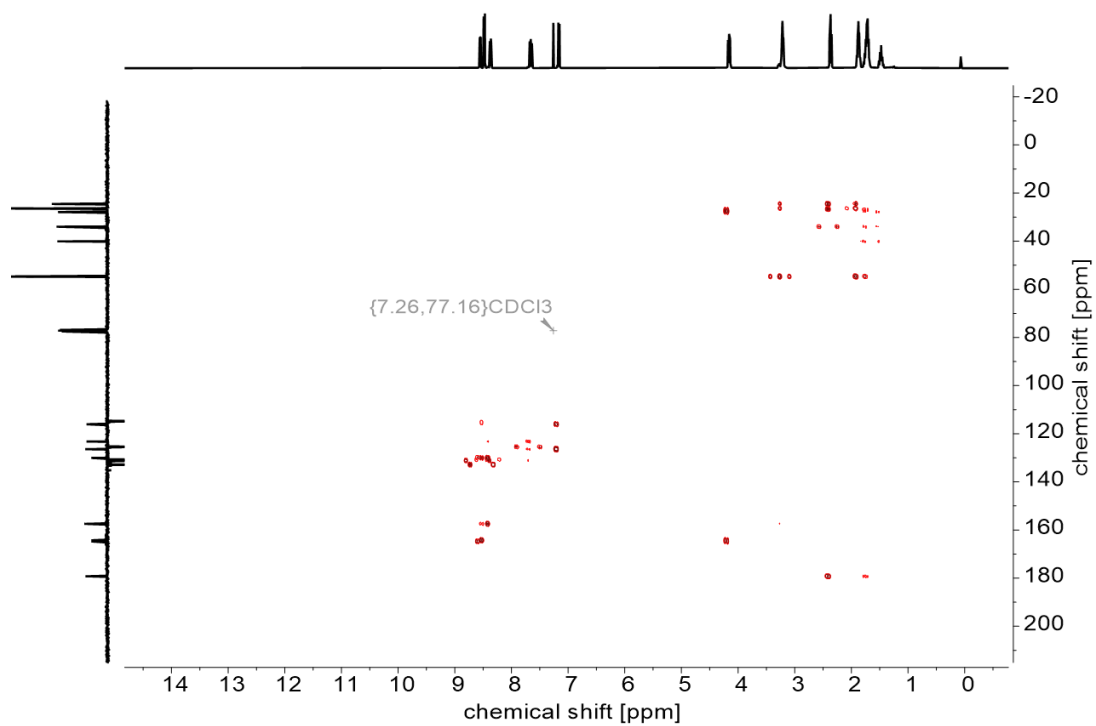

Figure S11:  $^1\text{H}$ ,  $^{13}\text{C}$ -HMBC-NMR spectrum ( $\text{CDCl}_3$ , 101 MHz, 298 K) of  $\text{C}_6\text{-Nap 3}$ .

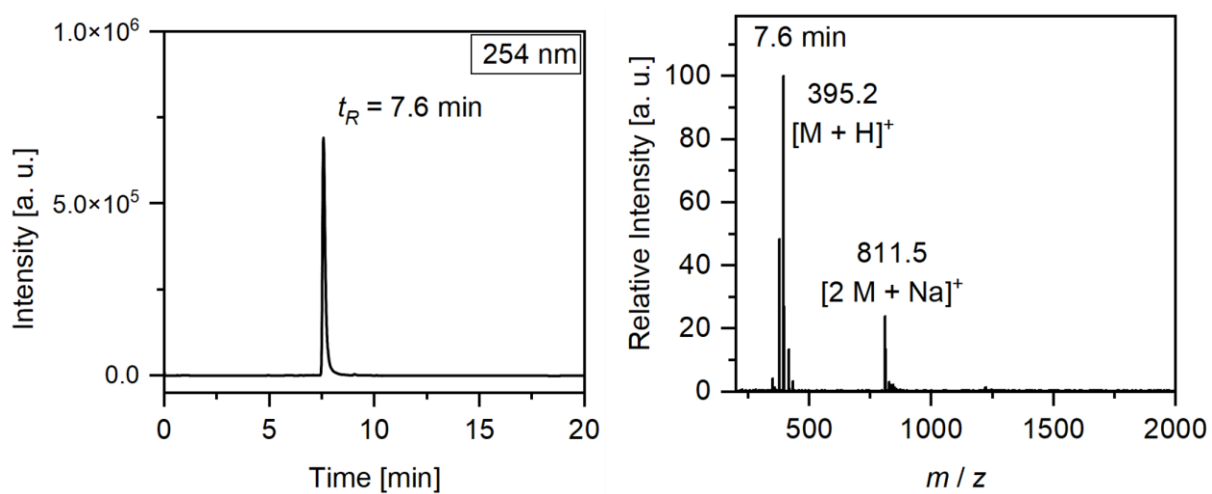

Figure S12: LC elugram (left, detection at 254 nm) and corresponding mass data (right) of  $\text{C}_6\text{-Nap 3}$ .

### 2.1.3 Synthesis of 3-(1,3-dioxo-6-(piperidin-1-yl)-1*H*-benzo[*de*]isoquinolin-2(3*H*)-yl)-propanoic acid (C<sub>3</sub>-Nap)

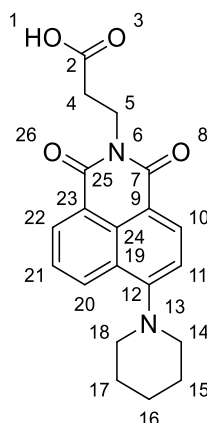

The synthesis was performed with a modified procedure referenced to Li et al.[2] 4-Piperidinyl-1,8-naphthalic anhydride (**2**, 100 mg; 0.36 mmol; 1.0 equiv),  $\beta$ -alanine (32 mg; 0.36 mmol; 1.0 equiv) and 4-DMAP (5 mg; 0.04 mmol; 0.1 equiv) were covered with EtOH (10 mL). The reaction mixture was stirred under reflux conditions for 24 h. The mixture was diluted with DCM (10 mL) and the solution was washed with 1 M HCl (3  $\times$  5 mL) and brine (1  $\times$  10 mL). The organic layer was dried over MgSO<sub>4</sub>, filtered and the solvents were removed under reduced pressure. C<sub>3</sub>-Nap **4** (110 mg; 0.31 mmol; 87%) was obtained as an orange solid.

**LC-MS:** (pos.): calculated for [M + H]<sup>+</sup>:  $m/z$  = 353.4; measured:  $m/z$  = 353.2; calculated for [2 M + Na]<sup>+</sup>:  $m/z$  = 727.8; measured:  $m/z$  = 727.4.

**R<sub>f</sub>:** 0.72 (DCM/MeOH = 7:3, *v/v*; 1 % AcOH).

**<sup>1</sup>H NMR, COSY** (400 MHz, CDCl<sub>3</sub>, 298 K):  $\delta$  [ppm] = 8.58 (dd, 1H,  $J$  = 7.3 Hz, 1.2 Hz,  $H_{20}$ ); 8.50 (d, 1H,  $J$  = 8.1 Hz,  $H_{22}$ ); 8.40 (dd, 1H,  $J$  = 8.4 Hz, 1.2 Hz,  $H_{10}$ ); 7.68 (dd, 1H,  $J$  = 8.4 Hz, 7.3 Hz,  $H_{21}$ ); 7.18 (d, 1H,  $J$  = 8.1 Hz,  $H_{11}$ ); 4.50 (dd, 2H,  $J$  = 7.9 Hz, 6.9 Hz,  $H_5$ ); 3.24 (t, 4H,  $J$  = 5.3 Hz,  $H_{14, 18}$ ); 2.83 (dd, 2H,  $J$  = 7.9 Hz, 7.0 Hz,  $H_4$ ); 1.89 (p, 4H,  $J$  = 5.6 Hz,  $H_{15, 17}$ ); 1.73 (t, 2H,  $J$  = 5.8 Hz,  $H_{16}$ ).

**<sup>13</sup>C NMR, HSQC, HMBC** (101 MHz, CDCl<sub>3</sub>, 298 K):  $\delta$  [ppm] = 175.0, 164.7, 164.2, 157.8, 133.1, 131.4, 131.1, 130.2, 126.4, 125.5, 123.0, 115.7, 114.9, 54.7, 35.8, 32.6, 26.4, 24.5.

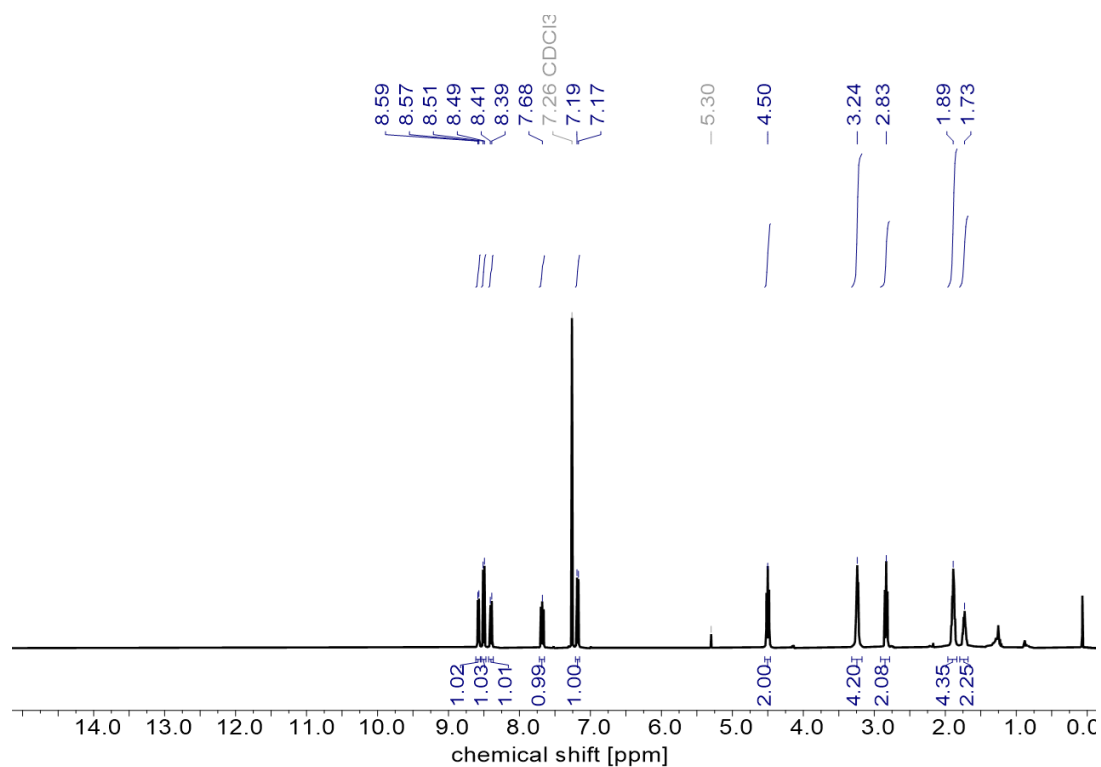

Figure S13: <sup>1</sup>H NMR spectrum (CDCl<sub>3</sub>, 400 MHz, 298 K) of C<sub>3</sub>-Nap **4**.

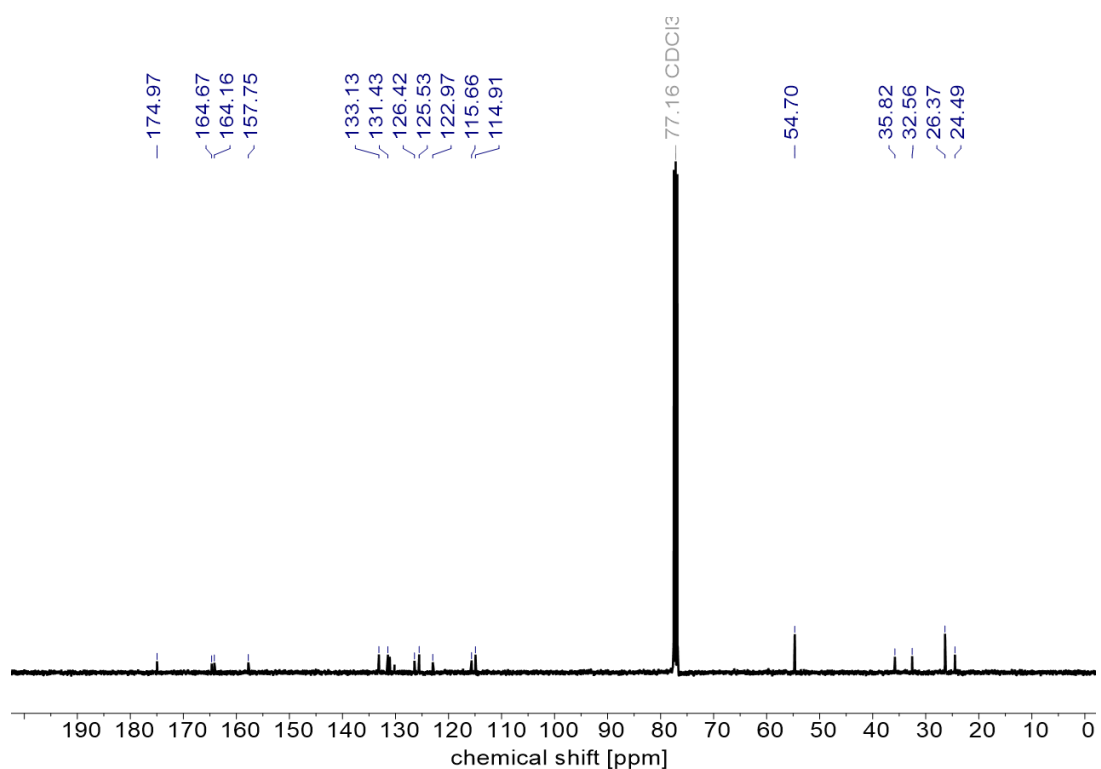

Figure S14: <sup>13</sup>C NMR spectrum (CDCl<sub>3</sub>, 101 MHz, 298 K) of C<sub>3</sub>-Nap **4**.

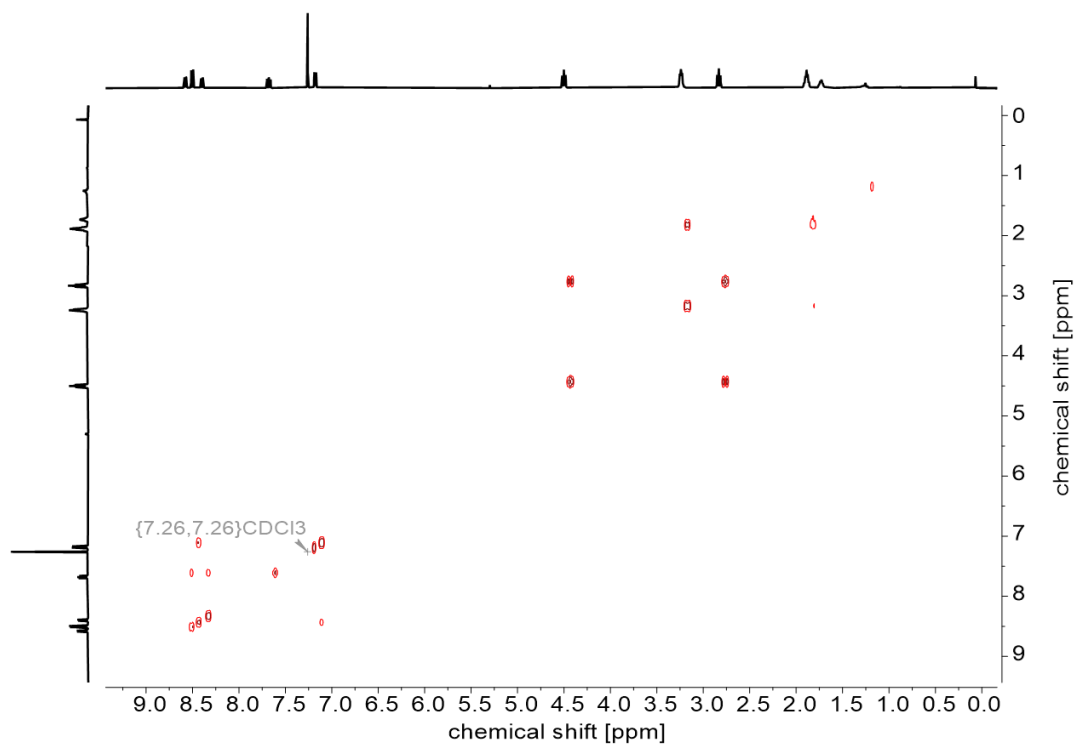

Figure S15:  $^1\text{H}, ^1\text{H}$ -COSY-NMR spectrum ( $\text{CDCl}_3$ , 400 MHz, 298 K) of  $\text{C}_3$ -Nap **4**.

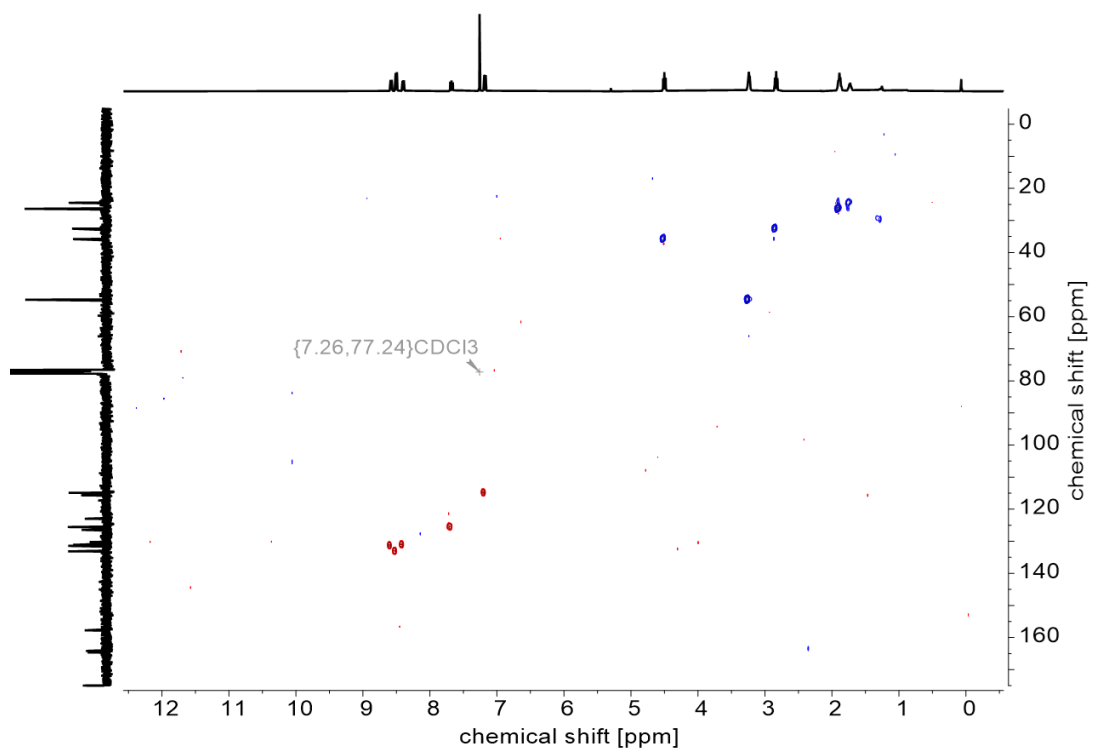

Figure S16:  $^1\text{H}, ^{13}\text{C}$ -HSQC-NMR spectrum ( $\text{CDCl}_3$ , 101 MHz, 298 K) of  $\text{C}_3$ -Nap **4**.

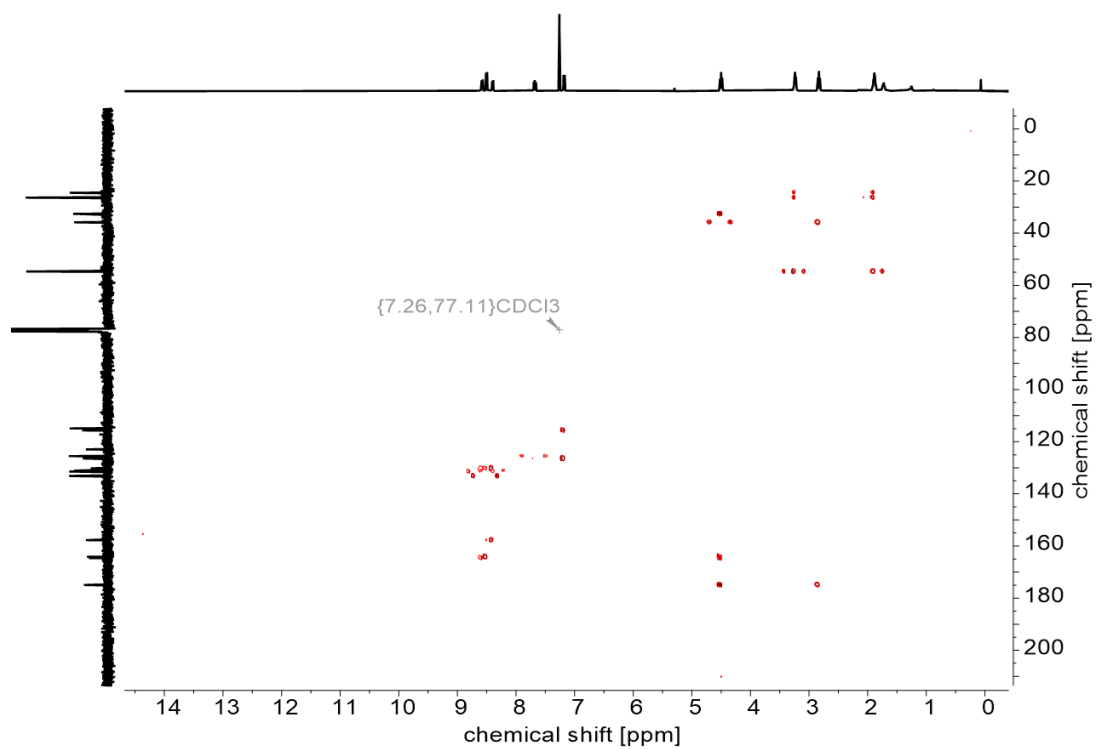

Figure S17:  $^1\text{H}$ ,  $^{13}\text{C}$ -HMBC-NMR spectrum ( $\text{CDCl}_3$ , 101 MHz, 298 K) of  $\text{C}_3$ -Nap 4.

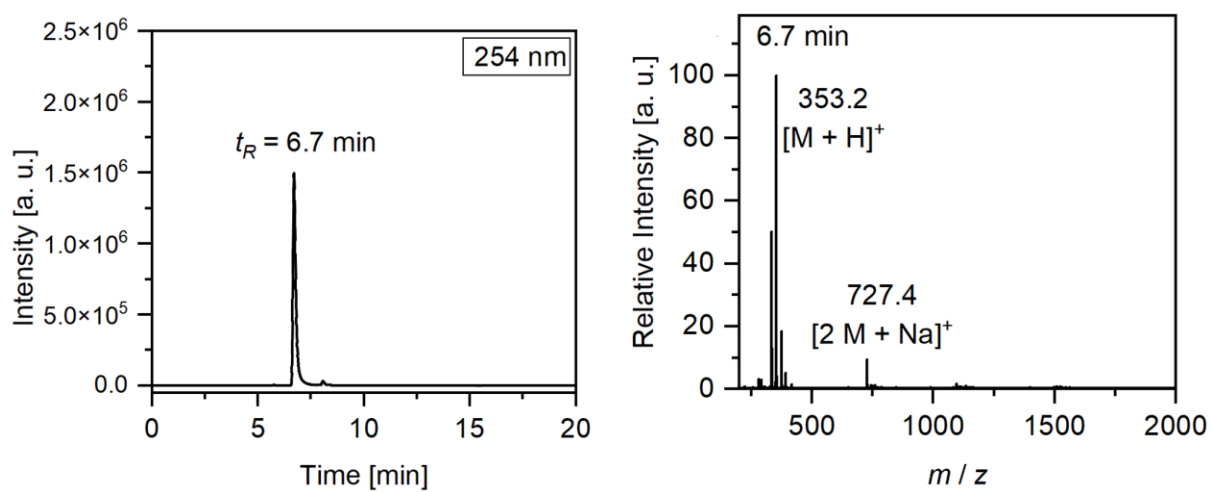

Figure S18: LC elugram (left, detection at 254 nm) and corresponding mass data (right) of  $\text{C}_3$ -Nap 4.

#### 2.1.4 Synthesis of (2*S*,3*S*)-2-(1,3-dioxo-6-(piperidin-1-yl)-1*H*-benzo[*de*]isoquinolin-2(3*H*)-yl)-3-methylpentanoic acid (C<sub>0</sub>-Nap).

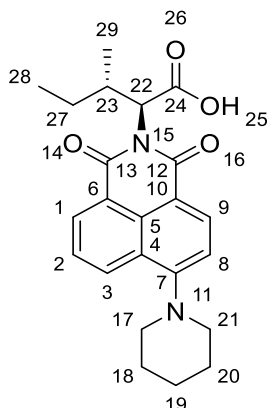

4-Piperidinyl-1,8-naphthalic anhydride (**2**, 200 mg; 0.71 mmol; 1.0 equiv), L-isoleucine (115 mg; 0.85 mmol; 1.2 equiv) and 4-DMAP (9 mg; 0.07 mmol; 0.1 equiv) were covered with EtOH (10 mL). *N,N'*-DIPEA (150  $\mu$ L; 0.85 mmol; 1.2 equiv) was added in one portion. The reaction mixture was stirred under reflux conditions overnight and diluted with DCM (10 mL). The solution was washed with 1 M HCl (3  $\times$  5 mL) and brine (1  $\times$  10 mL). The organic layer was dried over MgSO<sub>4</sub>, filtered and the solvents were removed under reduced pressure. C<sub>0</sub>-Nap **5** (280 mg; 0.71 mmol; 100%) was obtained as an orange solid.

**LC-MS:** (pos.): calculated for [M + H]<sup>+</sup>:  $m/z$  = 395.5; measured:  $m/z$  = 395.2; calculated for [2 M + Na]<sup>+</sup>:  $m/z$  = 811.9; measured:  $m/z$  = 811.5.

**R<sub>f</sub>:** 0.75 (EtAc/<sup>c</sup>Hex = 1:2, v/v, 1 % TFA).

**<sup>1</sup>H NMR, COSY** (400 MHz, CDCl<sub>3</sub>, 298 K):  $\delta$  [ppm] = 8.57 (dd, 1H,  $J$  = 7.3 Hz, 1.2 Hz,  $H_3$ ); 8.50 (d, 1H,  $J$  = 8.1 Hz,  $H_1$ ); 8.40 (dd, 1H,  $J$  = 8.4 Hz, 1.2 Hz,  $H_9$ ); 7.68 (dd, 1H,  $J$  = 8.4 Hz, 7.3 Hz,  $H_2$ ); 7.18 (d, 1H,  $J$  = 8.1 Hz,  $H_8$ ); 5.47 (d, 1H,  $J$  = 9.3 Hz,  $H_{22}$ ); 3.24 (t, 4H,  $J$  = 5.3 Hz,  $H_{17, 21}$ ); 2.62 (tdd, 1H,  $J$  = 10.1 Hz, 6.6 Hz, 3.7 Hz,  $H_{23}$ ); 1.88 (p, 4H,  $J$  = 5.6 Hz,  $H_{18, 20}$ ); 1.73 (q, 2H,  $J$  = 6.2 Hz,  $H_{19}$ ); 1.34–1.26 (m, 1H,  $H_{27}$ ); 1.24 (d, 3H,  $J$  = 6.5 Hz,  $H_{29}$ ); 1.09–0.91 (m, 1H,  $H_{27'}$ ); 0.80 (t, 3H,  $J$  = 7.4 Hz,  $H_{28}$ ).

**<sup>13</sup>C NMR, HSQC, HMBC** (101 MHz, CDCl<sub>3</sub>, 298 K):  $\delta$  [ppm] = 174.3, 164.6, 164.1, 157.9, 133.6, 131.9, 131.3, 130.4, 126.4, 125.6, 122.7, 115.2, 114.9, 58.2, 54.7, 33.5, 31.1, 26.4, 25.2, 24.5, 18.0, 11.2.

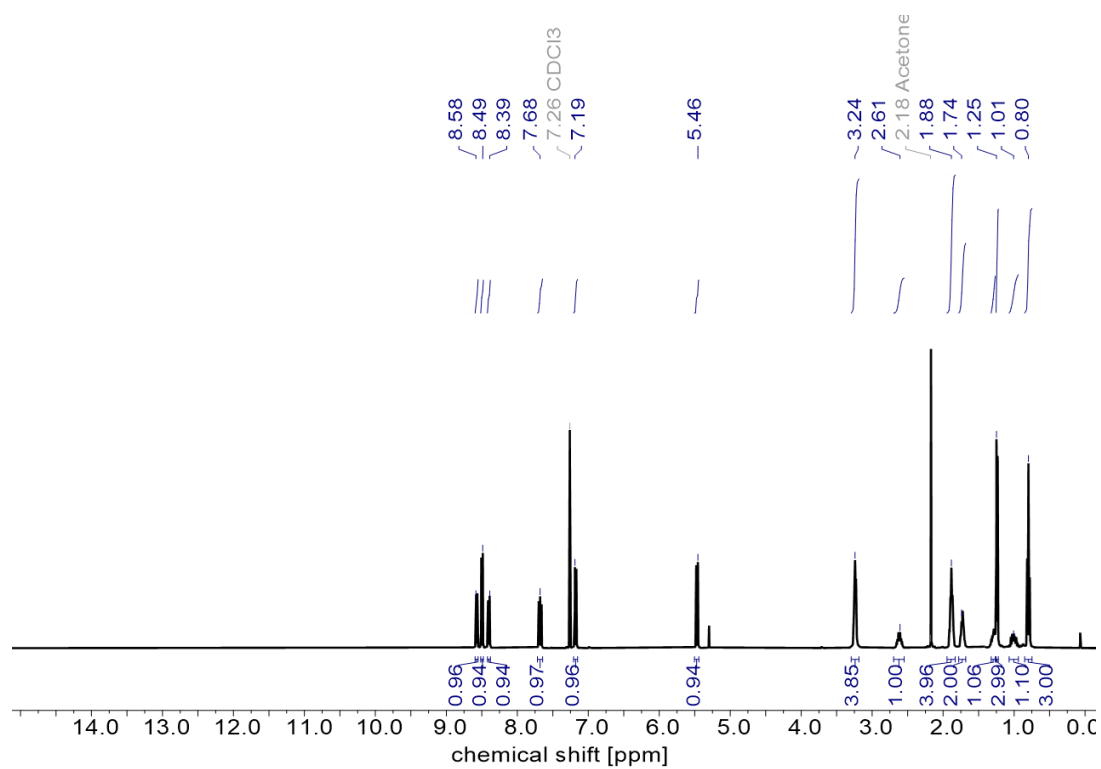

Figure S19:  $^1\text{H}$  NMR spectrum ( $\text{CDCl}_3$ , 400 MHz, 298 K) of  $\text{C}_0\text{-Nap 5}$ .

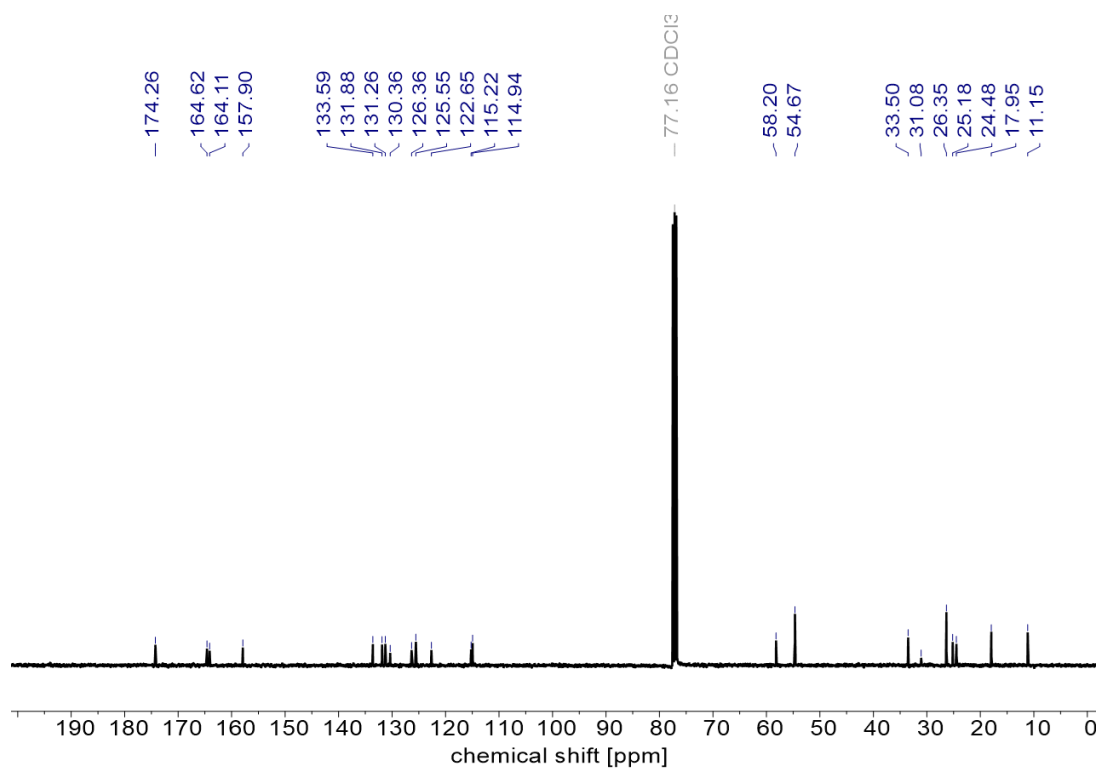

Figure S20:  $^{13}\text{C}$  NMR spectrum ( $\text{CDCl}_3$ , 101 MHz, 298 K) of  $\text{C}_0\text{-Nap 5}$ .

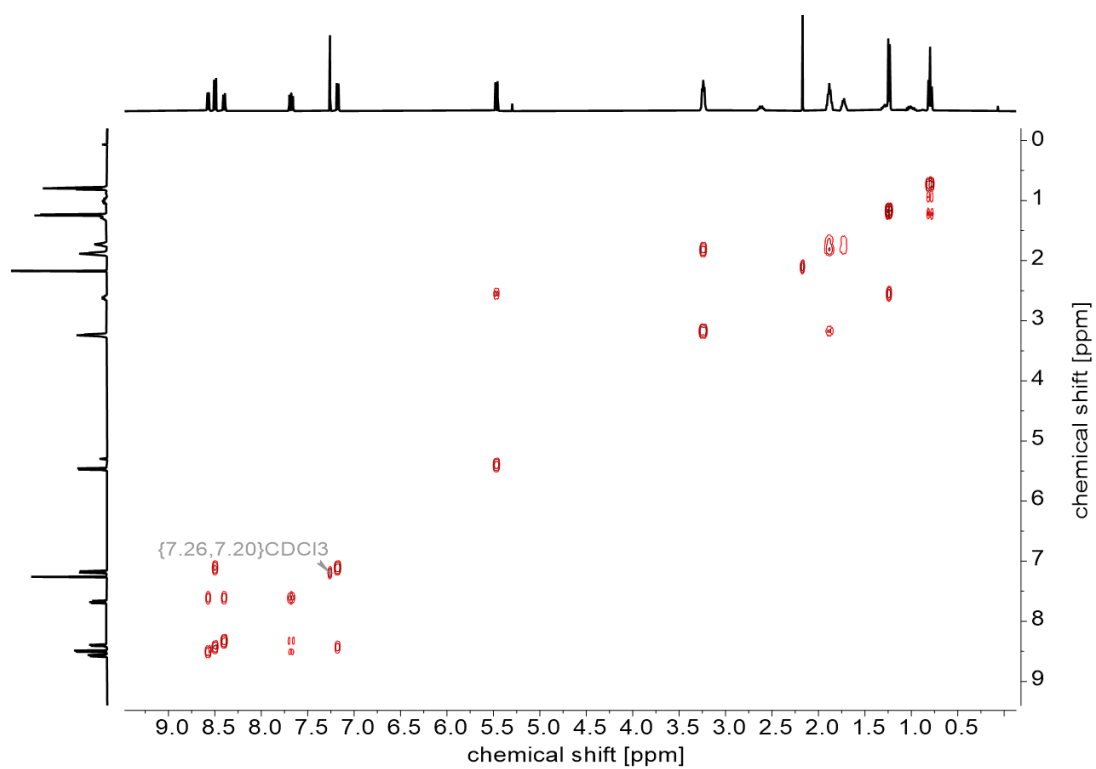

Figure S21:  $^1\text{H}, ^1\text{H}$ -COSY-NMR spectrum ( $\text{CDCl}_3$ , 400 MHz, 298 K) of  $\text{C}_0\text{-Nap 5}$ .

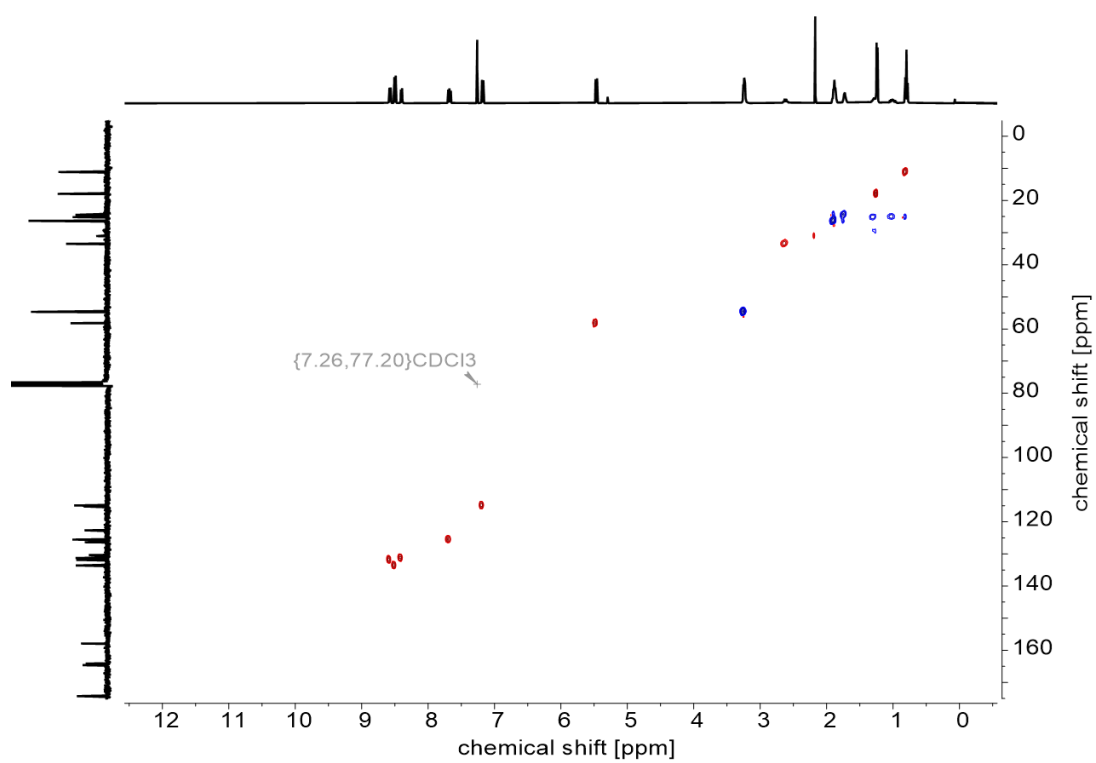

Figure S22:  $^1\text{H}, ^{13}\text{C}$ -HSQC-NMR spectrum ( $\text{CDCl}_3$ , 101 MHz, 298 K) of  $\text{C}_0\text{-Nap 5}$ .

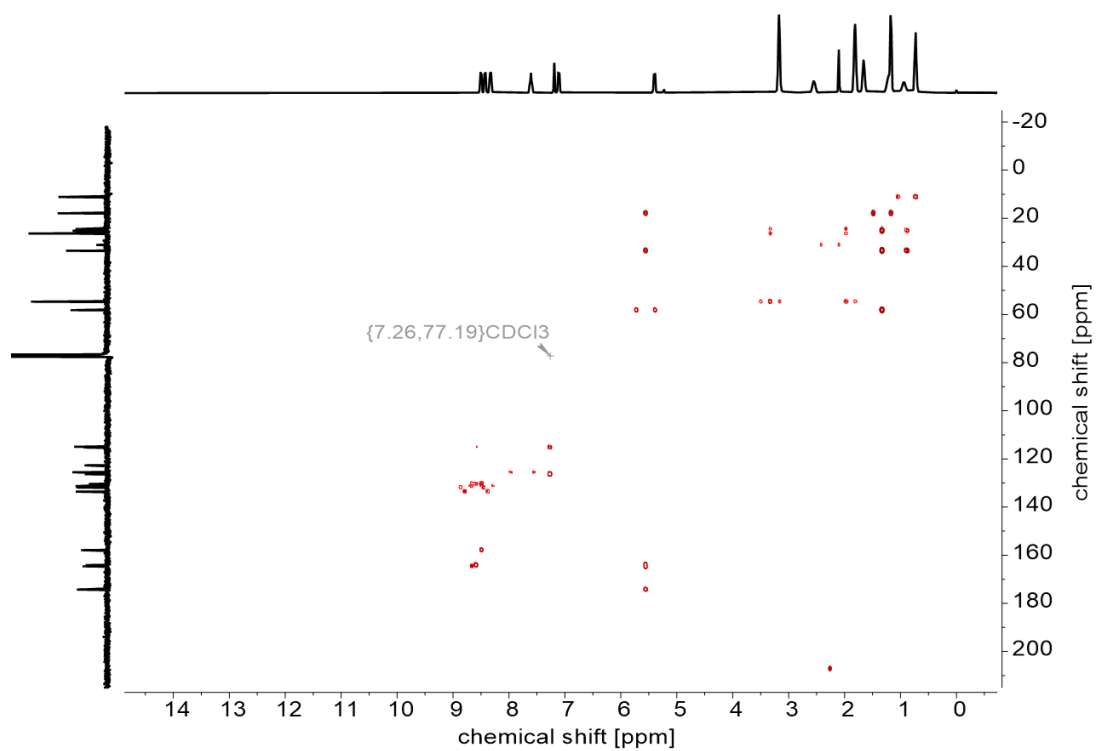

Figure S23:  $^1\text{H}$ ,  $^{13}\text{C}$ -HMBC-NMR spectrum ( $\text{CDCl}_3$ , 101 MHz, 298 K) of  $\text{C}_0$ -Nap 5.

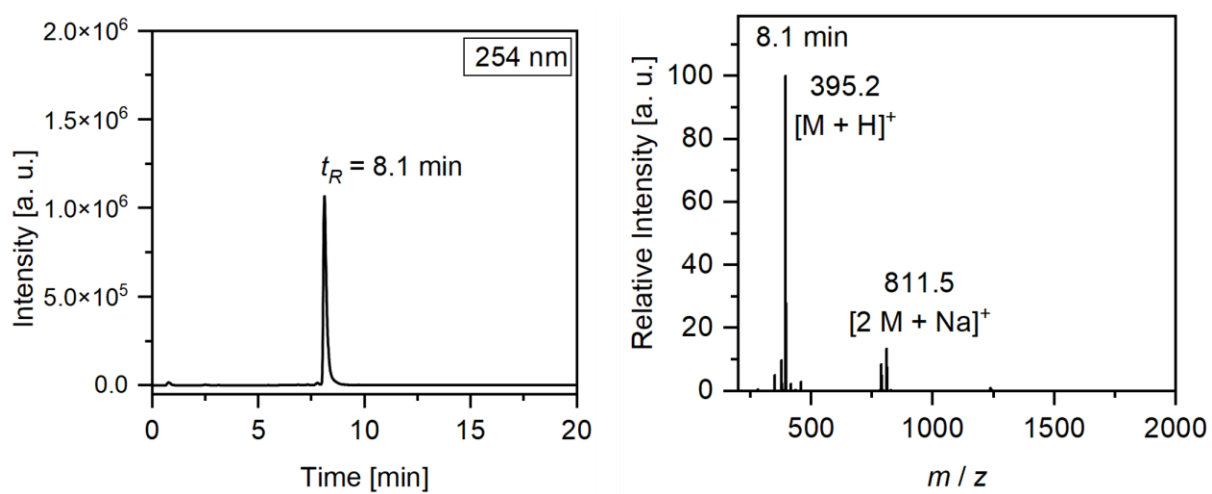

Figure S24: LC elugram (left, detection at 254 nm) and corresponding mass data (right) of  $\text{C}_0$ -Nap 5.

## 2.2 Synthesis of peptides

### 2.2.1 Synthesis of C<sub>6</sub>-Nap-ICA

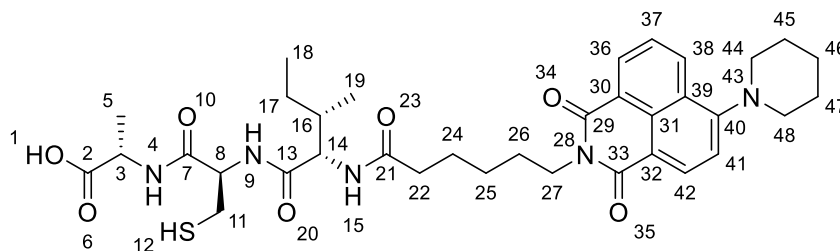

C<sub>6</sub>-Nap-ICA **6** was synthesized using SPPS at a scale of 0.10 mmol on Fmoc-L-Ala CIt-resin according to the general procedure for peptide synthesis. After deprotection of the final Fmoc-protecting group, the H<sub>2</sub>N-ICA-CIt resin was washed with DMF (3 × 5 mL). C<sub>6</sub>-Nap **3** (80 mg; 0.12 mmol; 1.2 equiv), PyBOP® (155 mg; 0.30 mmol; 3.0 equiv) and *N,N'*-DIPEA (100 μL, 0.60 mmol; 6.0 equiv) were added to the resin and covered with DMF (5 mL). The reaction mixture was mixed overnight at room temperature. The mixture was filtered and washed with DMF (3 × 5 mL) and DCM (3 × 5 mL). The resin was treated with a cleavage cocktail consisting of 95% TFA, 2.5% TIPS and 2.5% H<sub>2</sub>O for two hours at room temperature. The mixture was filtered and the resin was washed with DCM (3 × 5 mL). The solvents were removed under reduced pressure. The crude was purified using HPLC according to the general procedure. C<sub>6</sub>-Nap-ICA **6** (25 mg; 0.037 mmol; 37%) was obtained as a yellow solid.

**LC-MS:** (pos.): calculated for [M + H]<sup>+</sup>: *m/z* = 682.9; measured: *m/z* = 682.4; calculated for [M + Na]<sup>+</sup>: *m/z* = 704.9; measured: *m/z* = 704.4; calculated for [2 M + Na]<sup>+</sup>: *m/z* = 1386.7; measured: *m/z* = 1385.9.

**<sup>1</sup>H NMR, COSY** (400 MHz, DMSO-*d*<sub>6</sub>, 298 K): δ [ppm] = 12.61 (s, 1H, *H*<sub>1</sub>); 8.47 (dd, 1H, *J* = 7.3 Hz, 1.2 Hz, *H*<sub>38</sub>); 8.43–8.36 (m, 2H, *H*<sub>36,42</sub>); 8.15 (d, 1H, *J* = 7.1 Hz, *H*<sub>9</sub>); 7.98 (d, 1H, *J* = 7.9 Hz, *H*<sub>4</sub>); 7.87 (d, 1H, *J* = 8.4 Hz, *H*<sub>15</sub>); 7.81 (dd, 1H, *J* = 8.5 Hz, 7.3 Hz, *H*<sub>37</sub>); 7.31 (d, 1H, *J* = 8.2 Hz, *H*<sub>41</sub>); 4.43 (td, 1H, *J* = 7.7 Hz, 5.1 Hz, *H*<sub>8</sub>); 4.16 (dt, 2H, *J* = 13.8 Hz, 7.5 Hz, *H*<sub>3,14</sub>); 4.01 (t, 2H, *J* = 7.4 Hz, *H*<sub>27</sub>); 3.20 (t, 4H, *J* = 5.3 Hz, *H*<sub>44,48</sub>); 2.84–2.63 (m, 2H, *H*<sub>11</sub>); 2.26 (dd, 1H, *J* = 9.0 Hz, 7.9 Hz, *H*<sub>16</sub>); 2.41 (qd, 1H, *J* = 14.3 Hz, 7.1 Hz, *H*<sub>22</sub>); 1.82 (p, 4H, *J* = 5.6 Hz, *H*<sub>45,47</sub>); 1.75–1.45 (m, 8H, *H*<sub>24,25,26,46</sub>); 1.03–0.88 (m, 2H, *H*<sub>17</sub>); 0.81–0.72 (m, 6H, *H*<sub>18,19</sub>).

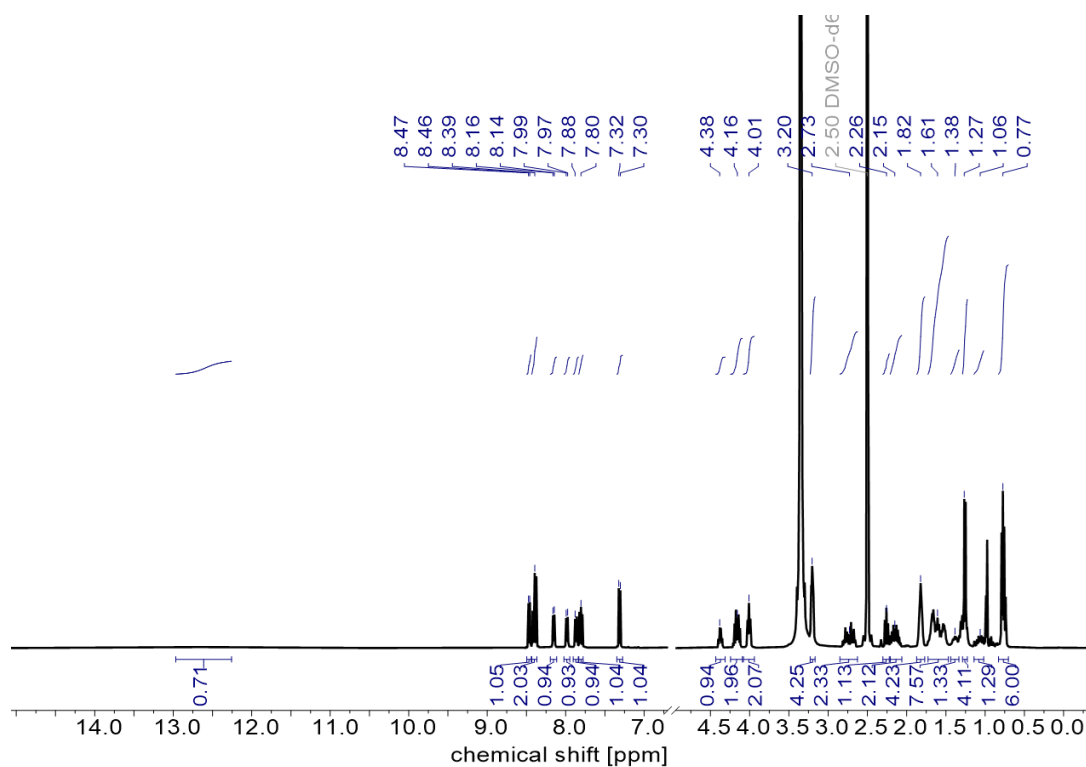

Figure S25:  $^1\text{H}$  NMR spectrum (DMSO- $d_6$ , 400 MHz, 298 K) of C<sub>6</sub>-Nap-ICA **6**.

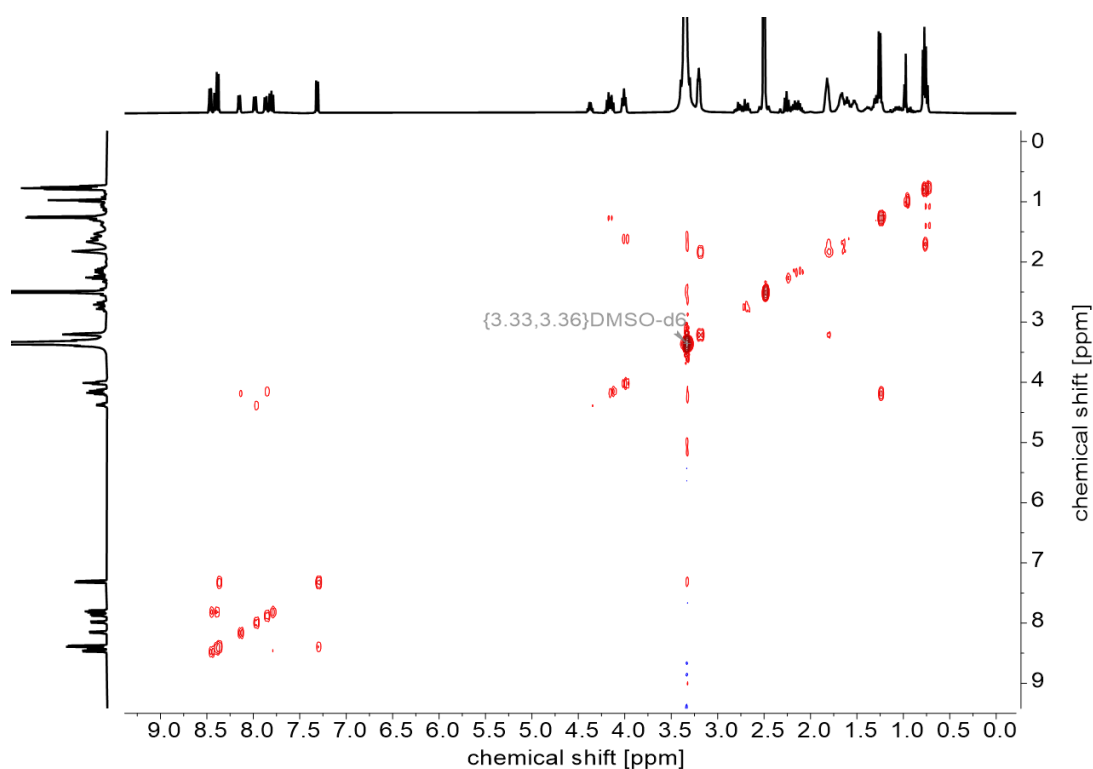

Figure S26:  $^1\text{H}$ ,  $^1\text{H}$ -COSY-NMR spectrum (DMSO- $d_6$ , 400 MHz, 298 K) of C<sub>6</sub>-Nap-ICA **6**.

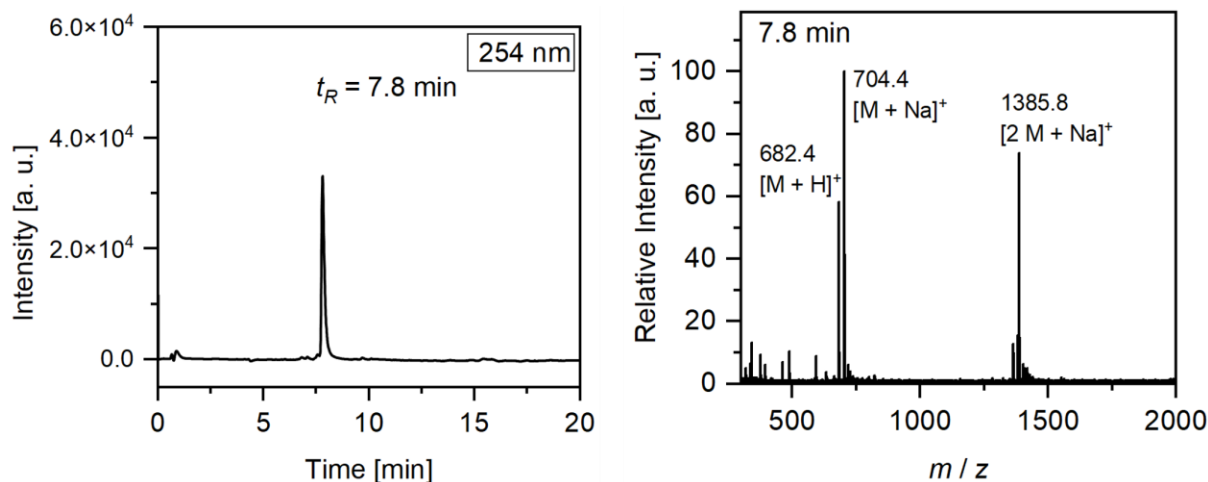

Figure S27: LC elugram (left, detection at 254 nm) and corresponding mass data (right) of C<sub>6</sub>-Nap-ICA 6.

## 2.2.2 Synthesis of C<sub>3</sub>-Nap-ICA

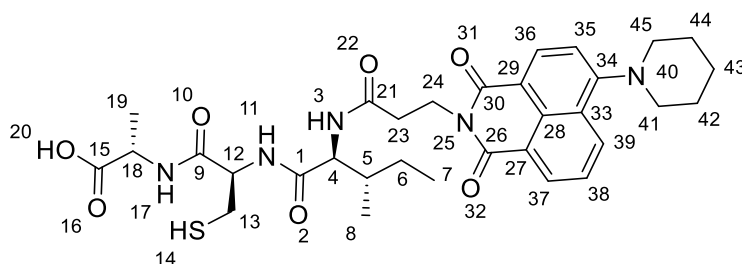

C<sub>3</sub>-Nap-ICA **7** was synthesized using SPPS at a scale of 0.10 mmol on Fmoc-L-Ala CIt-resin according to the general procedure for automated peptide synthesis. After deprotection of the final Fmoc-protecting group, the H<sub>2</sub>N-ICA-CIt resin was washed with DMF (3 × 5 mL). C<sub>3</sub>-Nap **4** (75 mg; 0.12 mmol; 1.2 equiv), PyBOP<sup>®</sup> (155 mg; 0.30 mmol; 3.0 equiv) and *N,N'*-DIPEA (100 μL, 0.60 mmol; 6.0 equiv) were added to the resin and covered with DMF (5 mL). The reaction mixture was mixed overnight at room temperature. The mixture was filtered and washed with DMF (3 × 5 mL) and DCM (3 × 5 mL). Then, the resin was treated with a cleavage cocktail consisting of 95% TFA, 2.5% TIPS and 2.5% H<sub>2</sub>O for two hours at room temperature. The mixture was filtered and the resin was washed with DCM (3 × 5 mL). The solvents were removed under reduced pressure. A yellow solid crude was obtained and purified via HPLC according to the general procedure. C<sub>3</sub>-Nap-ICA **7** (19 mg; 0.03 mmol; 30%) was obtained as an orange solid.

**LC-MS:** (pos.): calculated for [M + H]<sup>+</sup>:  $m/z = 640.8$ ; measured:  $m/z = 640.3$ ; calculated for [M + Na]<sup>+</sup>:  $m/z = 662.8$ ; measured:  $m/z = 662.3$ ; calculated for [2 M + H]<sup>+</sup>:  $m/z = 1280.5$ ; measured:  $m/z = 1279.8$ ; calculated for [2 M + Na]<sup>+</sup>:  $m/z = 1302.5$ ; measured:  $m/z = 1301.8$ .

**<sup>1</sup>H NMR, COSY** (700 MHz, DMSO-*d*<sub>6</sub>, 298 K):  $\delta$  [ppm] = 12.60 (s, 1H, *H*<sub>20</sub>); 8.47 (dd, 1H, *J* = 7.3 Hz, 1.2 Hz, *H*<sub>39</sub>); 8.42 (dd, 1H, *J* = 8.5 Hz, 1.2 Hz, *H*<sub>37</sub>); 8.38 (d, 1H, *J* = 8.1 Hz, *H*<sub>36</sub>); 8.13 (d, 1H, *J* = 7.1 Hz, *H*<sub>11</sub>); 8.07 (d, 1H, *J* = 8.1 Hz, *H*<sub>17</sub>); 8.04 (d, 1H, *J* = 8.0 Hz, *H*<sub>3</sub>); 7.81 (dd, 1H, *J* = 8.4 Hz, 7.2 Hz, *H*<sub>38</sub>); 7.32 (d, 1H, *J* = 8.1 Hz, *H*<sub>35</sub>); 4.39 (td, 1H, *J* = 7.9 Hz, 5.0 Hz, *H*<sub>12</sub>); 4.27 (ddd, 1H, *J* = 13.0 Hz, 8.8 Hz, 6.6 Hz, *H*<sub>4</sub>); 4.23–4.18 (m, 1H, *H*<sub>18</sub>); 4.14 (dt, 2H, *J* = 17.0 Hz, 7.5 Hz, *H*<sub>24</sub>); 3.21 (s, 4H, *H*<sub>41,45</sub>); 2.85–2.79 (m, 1H, *H*<sub>13'</sub>); 2.75–2.68 (m, 1H, *H*<sub>13''</sub>); 2.60–2.51 (m, 2H, *H*<sub>23</sub>); 2.30 (t, 1H, *J* = 8.5 Hz, *H*<sub>5</sub>); 1.82 (p, 4H, *J* = 5.6 Hz, *H*<sub>42,44</sub>); 1.66 (s, 2H, *H*<sub>43</sub>); 1.41–1.35 (m, 1H, *H*<sub>6</sub>); 1.26 (d, 3H, *J* = 7.3 Hz, *H*<sub>19</sub>); 1.07–0.99 (m, 1H, *H*<sub>6''</sub>); 0.79 (d, 3H, *J* = 6.9 Hz, *H*<sub>8</sub>); 0.73 (t, 3H, *J* = 7.4 Hz, *H*<sub>7</sub>).

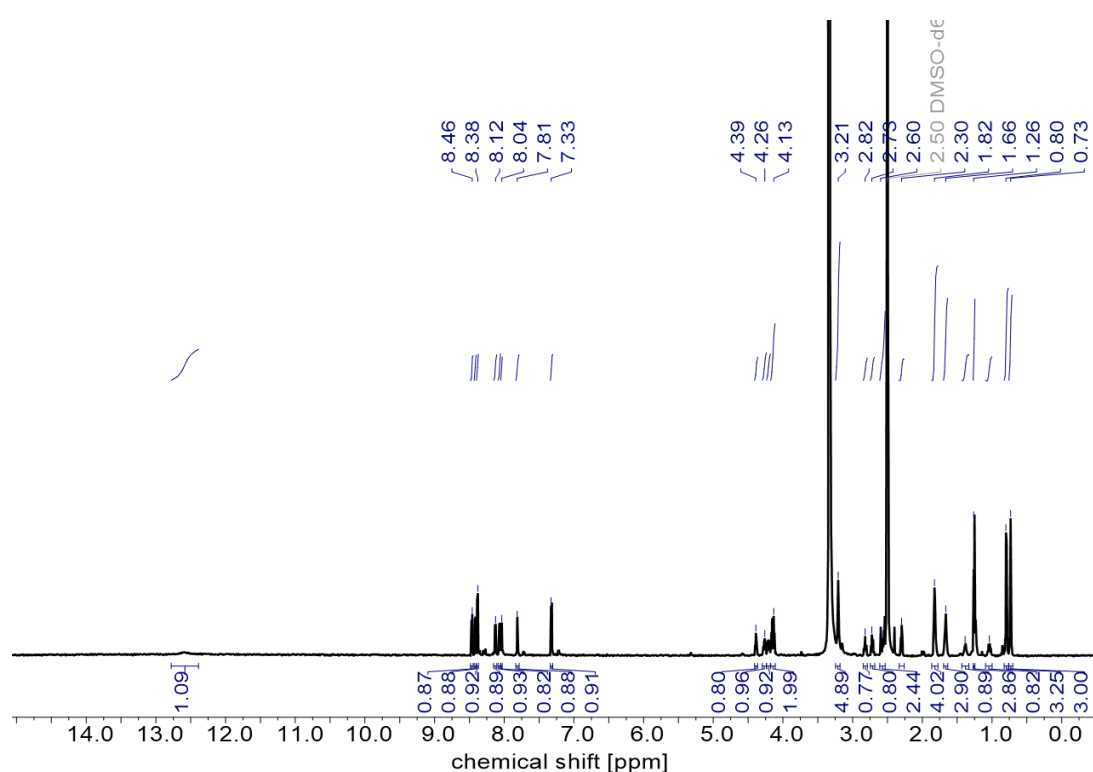

Figure S28: <sup>1</sup>H NMR spectrum (DMSO-*d*<sub>6</sub>, 700 MHz, 298 K) of C<sub>3</sub>-Nap-ICA 7.

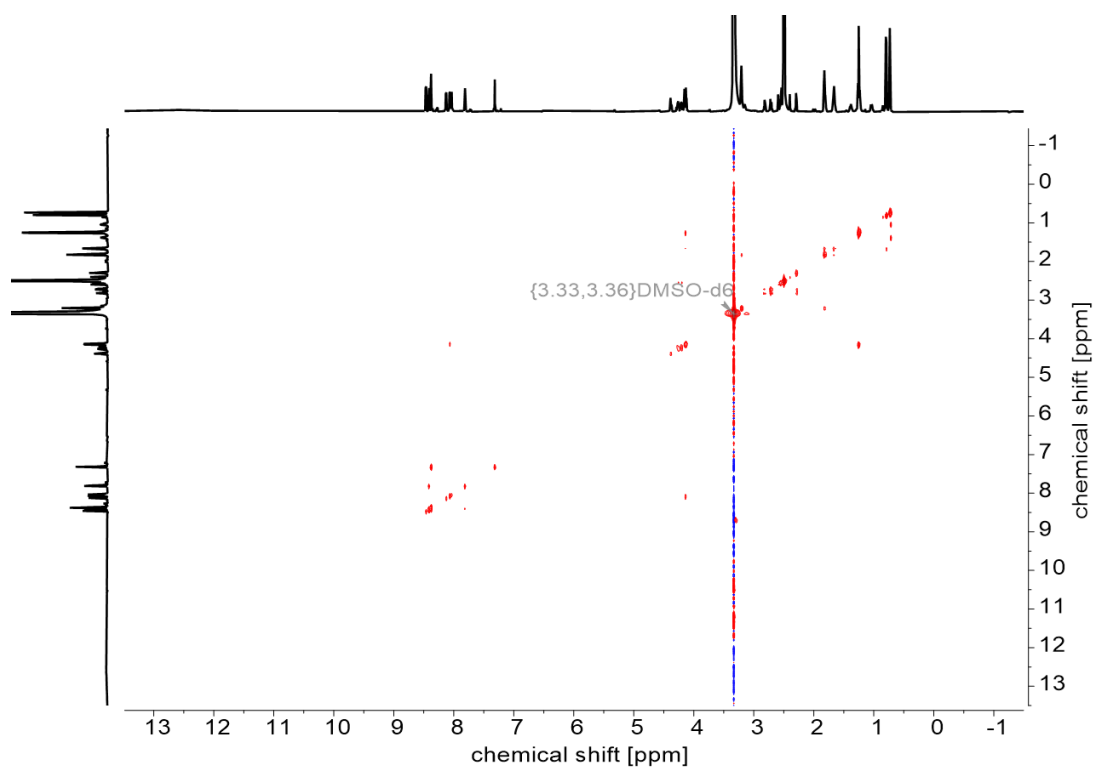

Figure S29:  $^1\text{H}$ ,  $^1\text{H}$ -COSY-NMR spectrum ( $\text{DMSO-}d_6$ , 700 MHz, 298 K) of  $\text{C}_3\text{-Nap-ICA 7}$ .

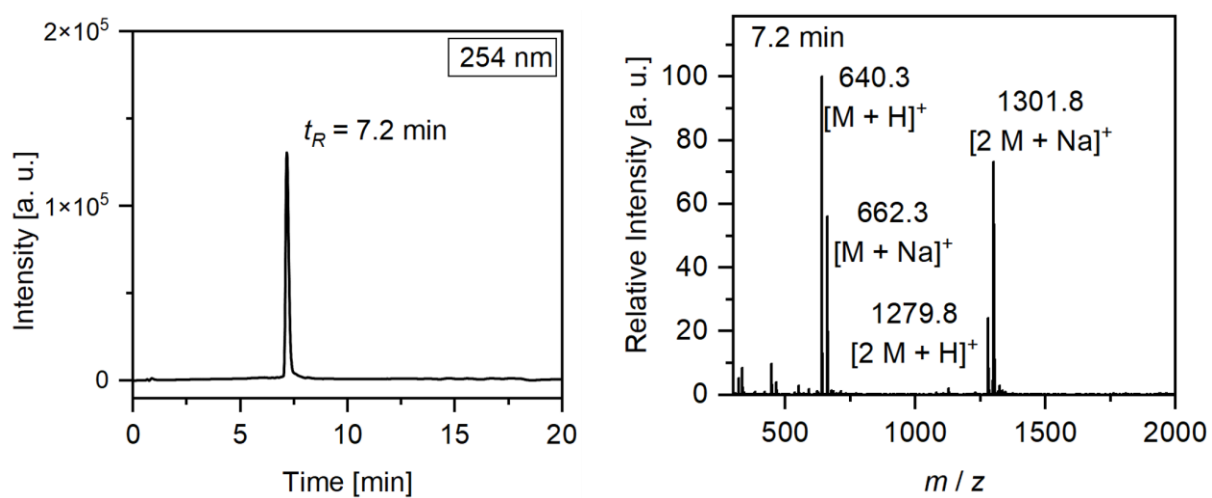

Figure S30: LC elugram (left, detection at 254 nm) and corresponding mass data (right) of  $\text{C}_3\text{-Nap-ICA 7}$ .

### 2.2.3 Synthesis of C<sub>0</sub>-Nap-ICA

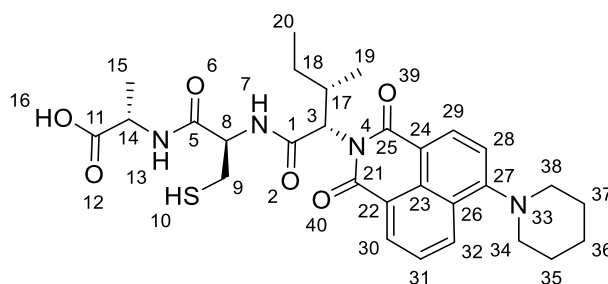

C<sub>0</sub>-Nap-ICA **8** was synthesized using SPPS at a scale of 0.10 mmol on Fmoc-L-Ala CIt-resin according to the general procedure for automated peptide synthesis. After deprotection of the final Fmoc-protecting group, the H<sub>2</sub>N-CA-CIt resin was washed with DMF (3 × 5 mL). C<sub>0</sub>-Nap **8** (70 mg; 0.12 mmol; 1.2 equiv), PyBOP® (155 mg; 0.30 mmol; 3.0 equiv), *N,N'*-DIPEA (100 μL; 0.60 mmol; 6.0 equiv) were dissolved in DMF (5 mL) and added to the resin. The mixture was mixed overnight at room temperature. After filtration, the mixture was washed with DMF (3 × 5 mL) and DCM (3 × 5 mL). The resin was treated with a cleavage cocktail consisting of 95% TFA, 2.5% TIPS and 2.5% H<sub>2</sub>O for two hours. The mixture was filtered and washed with DCM (3 × 5 mL). The solvents were removed under reduced pressure. A yellow solid crude was obtained and purified via HPLC according to the general procedure. C<sub>0</sub>-Nap-ICA **8** (14 mg; 0.025 mmol; 25%) was obtained as a yellow solid.

**LC MS:** (pos.): calculated for [M + H]<sup>+</sup>:  $m/z = 569.7$ ; measured:  $m/z = 569.3$ ; calculated for [2 M + H]<sup>+</sup>:  $m/z = 1138.4$ ; measured:  $m/z = 1137.7$ .

**<sup>1</sup>H NMR, COSY** (700 MHz, DMSO-*d*<sub>6</sub>, 298 K):  $\delta$  [ppm] = 12.53 (s, 1H,  $H_{16}$ ); 8.47 (d, 1H,  $J = 7.6$  Hz,  $H_{32}$ ); 8.44 (dd, 1H,  $J = 7.2$  Hz, 1.2 Hz,  $H_{30}$ ); 8.38 (d, 1H,  $J = 7.9$  Hz,  $H_{29}$ ); 8.19 (d, 1H,  $J = 7.1$  Hz,  $H_7$ ); 8.05 (d, 1H,  $J = 8.1$  Hz,  $H_{13}$ ); 7.83 (ddd, 1H,  $J = 14.0$  Hz, 8.4 Hz, 7.2 Hz,  $H_{28}$ ); 7.34 (dd, 1H,  $J = 14.6$  Hz, 8.2 Hz,  $H_{31}$ ); 5.15 (d, 1H,  $J = 9.2$  Hz,  $H_3$ ); 4.40 (qd, 1H,  $J = 8.6$  Hz, 4.7 Hz,  $H_8$ ); 4.15 (p, 1H,  $J = 7.3$  Hz,  $H_{14}$ ); 3.22 (t, 4H,  $J = 5.4$  Hz,  $H_{34, 38}$ ); 2.70–2.57 (m, 2H,  $H_{9, 9''}$ ); 2.02–1.96 (m, 1H,  $H_{17}$ ); 1.83 (p, 4H,  $J = 5.6$  Hz,  $H_{35, 37}$ ); 1.70–1.64 (m, 2H,  $H_{36}$ ); 1.29 (d, 2H,  $J = 7.3$  Hz,  $H_{18}$ ); 1.11 (d, 3H,  $J = 6.4$  Hz,  $H_{15}$ ); 0.97–0.87 (m, 3H,  $H_{19}$ ); 0.72 (t, 3H,  $J = 7.4$  Hz,  $H_{20}$ ).

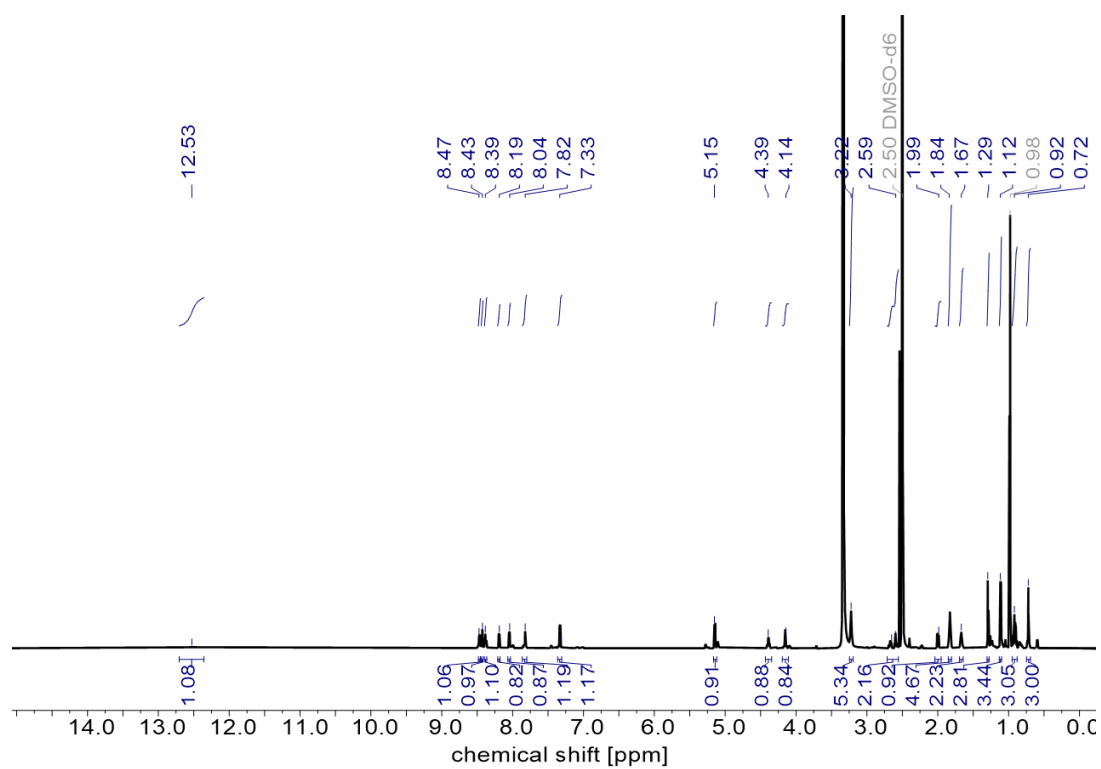

Figure S31:  $^1\text{H}$  NMR spectrum (DMSO- $d_6$ , 700 MHz, 298 K) of C<sub>0</sub>-Nap-ICA **8**.

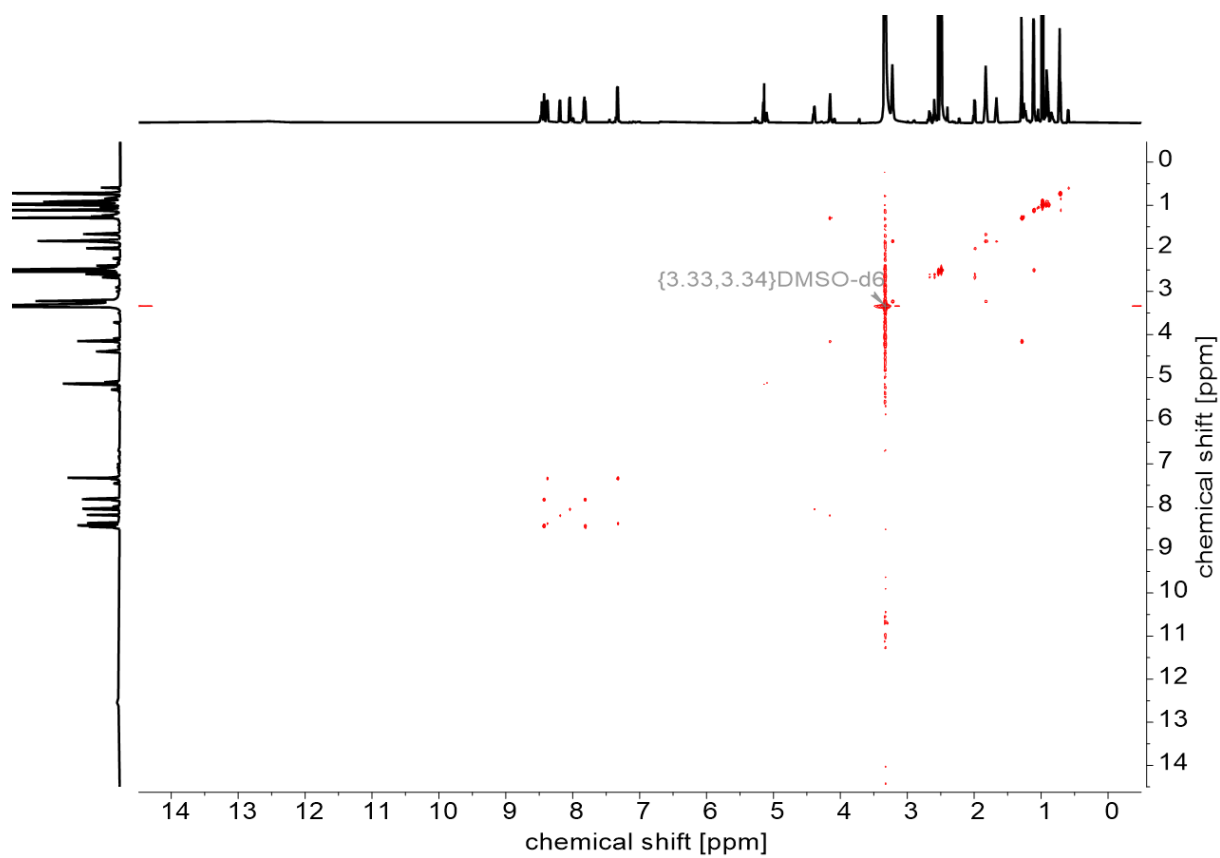

Figure S32:  $^1\text{H}$ ,  $^1\text{H}$ -COSY-NMR spectrum (DMSO- $d_6$ , 700 MHz, 298 K) of C<sub>0</sub>-Nap-ICA **8**.

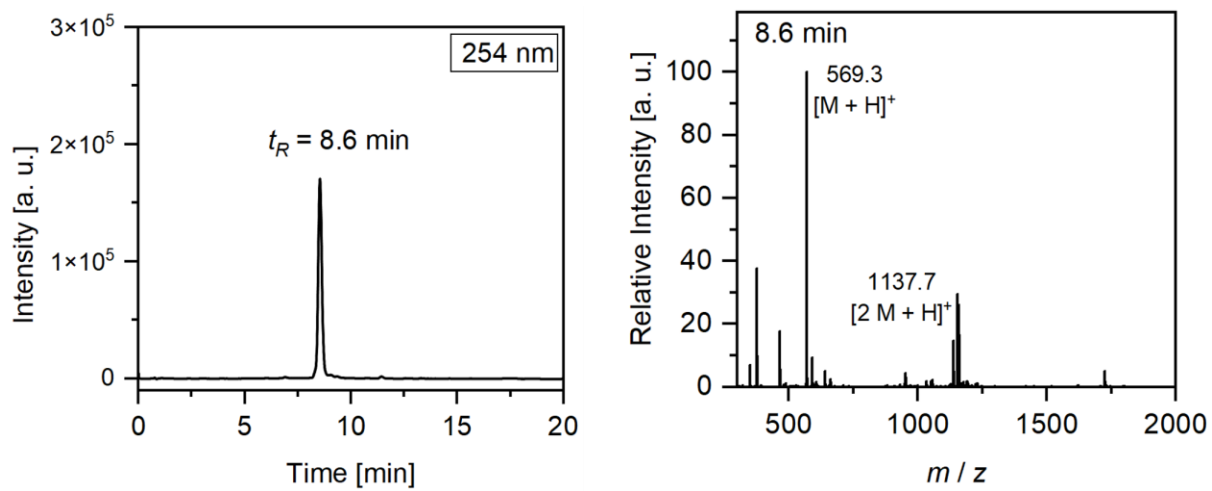

Figure S33: LC elugram (left, detection at 254 nm) and corresponding mass data (right) of C<sub>0</sub>-Nap-ICA **8**.

### 3 Self-assembly

#### 3.1 Assembly conversion rate

The peptides were analyzed according to the general procedure for assembly conversion rate determination. The elugrams were referenced to the standard and plotted using Origin Pro by OriginLab®. The area under curve (AUC) of the peptide signals in PBS ( $AUC_{Buffer}$ ) and in MeOH ( $AUC_{Organic\ Solvent}$ ) were calculated and used to determine the conversion rate ( $CR$ ) using the following equation S1:

$$CR [\%] = \left(1 - \frac{AUC_{Buffer}}{AUC_{Organic\ Solvent}}\right) \cdot 100 \% \quad (\text{equation S1})$$

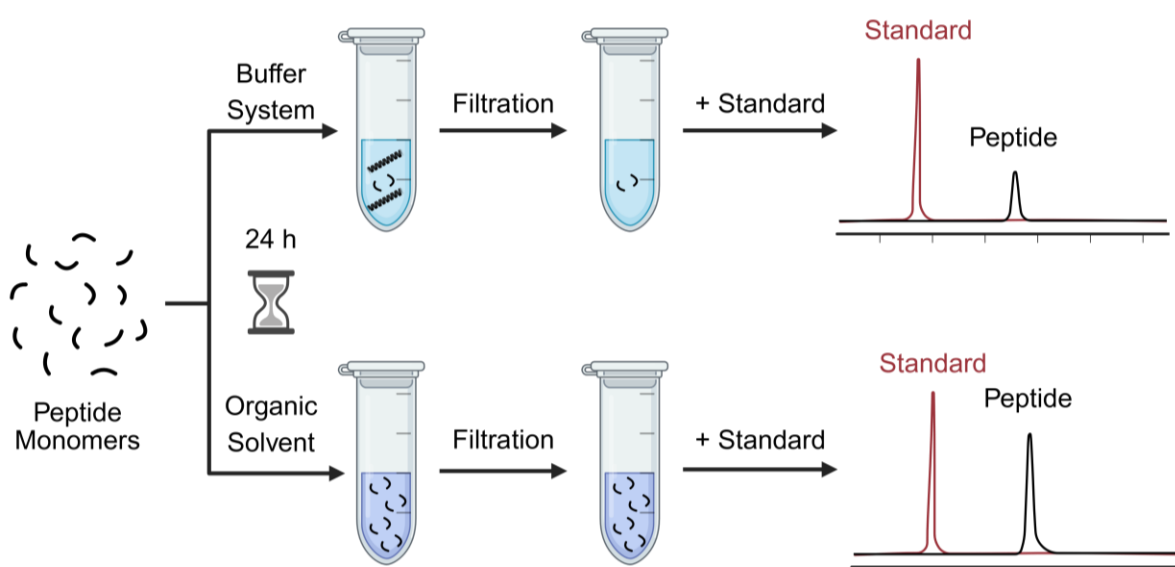

Figure S34: Scheme describing the procedure of the assembly conversion assay. Peptide monomers (10 mM in TFE) are added to an aqueous buffer system and an organic solvent, where the last-mentioned serves as a control in which peptide monomers do not assemble. The samples were incubated for 24 h. Aggregated peptides in the aqueous buffer system were removed through filtration. The peptide monomers in the filtrate were analyzed regarding their elution time and absorbance using analytical HPLC in both systems. The internal standard was added to normalize the absorbance. The differences in absorbance of the peptide monomers between the samples allows to determine the assembly conversion using equation S1. Buffer system: PBS buffer (50 mM, pH 7.4, 1% TFE), organic solvent: MeOH (1% TFE). Created in BioRender. Lahu, A. (2026) <https://BioRender.com/bvkpq0n>. This content is not subject to CC BY 4.0.

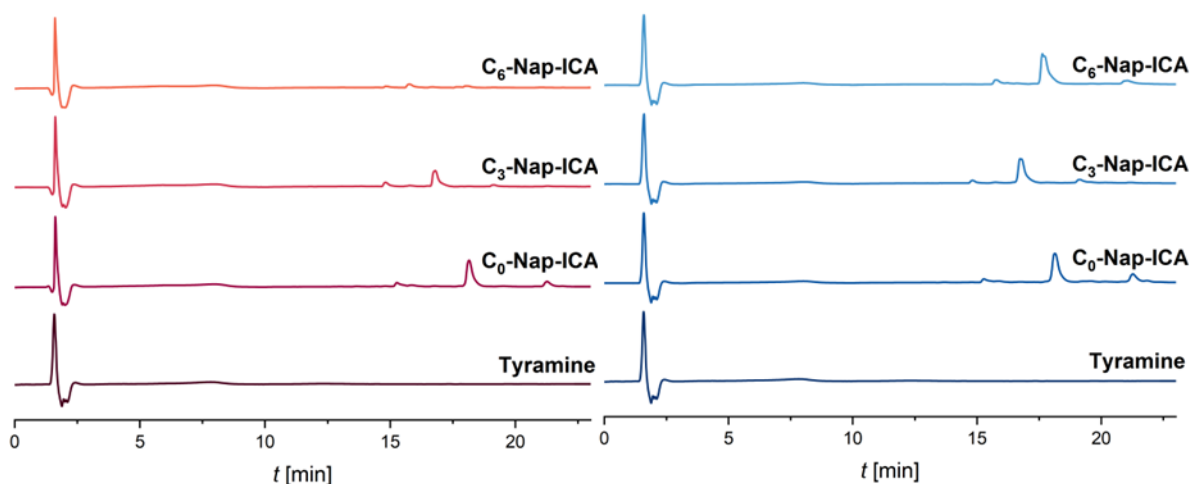

Figure S35: Elugrams of C<sub>6</sub>-Nap-ICA **6**, C<sub>3</sub>-Nap-ICA **7** and C<sub>0</sub>-Nap-ICA **8** (all 100  $\mu$ M) in PBS (50 mM, pH 7.4, 1% TFE; *left*) and MeOH (1% TFE; *right*) as well as the internal standard tyramine (200  $\mu$ M in MeOH, **Standard**). The elugrams are shown as a plot of absorbance intensity at 214 nm against retention time  $t_R$ .

### 3.2 Thioflavin T (ThT) assay

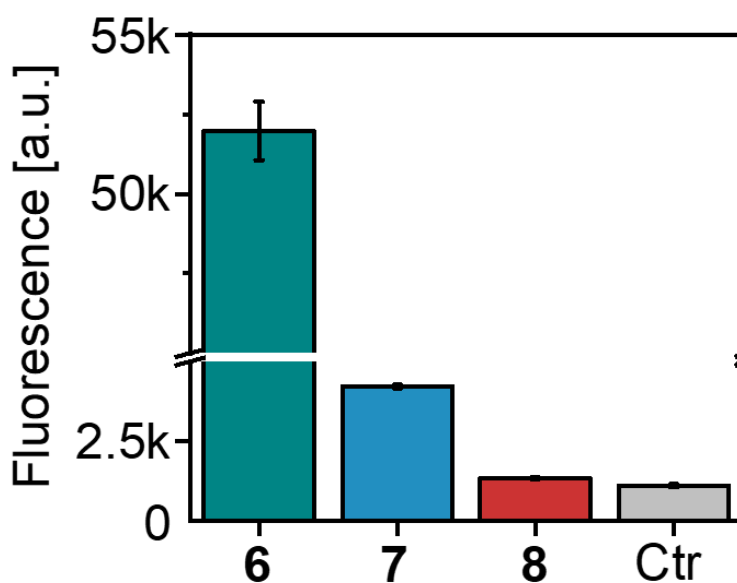

Figure S36: Bar plot showing the fluorescence intensity of thioflavin T at  $\lambda_{em} = 482$  nm ( $\lambda_{ex} = 450$  nm) after incubation with C<sub>6</sub>-Nap-ICA **6**, C<sub>3</sub>-Nap-ICA **7** or C<sub>0</sub>-Nap-ICA **8** (all 100  $\mu$ M) in PBS (50 mM, pH 7.4, 1% TFE). Control shows the fluorescence of Thioflavin T in PBS (50 mM, pH 7.4, 1% TFE).

### 3.3 Fluorescence microscopy, transmission electron and atomic force microscopy

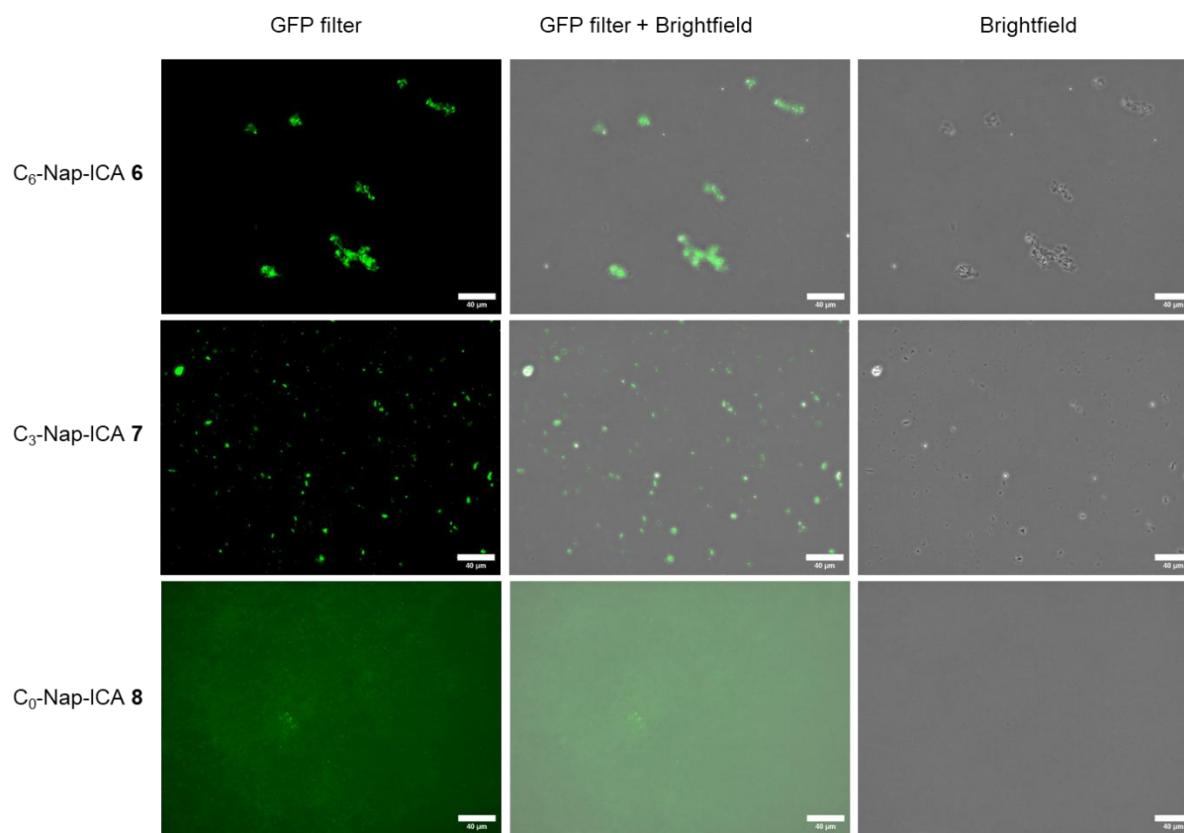

Figure S37: Fluorescence microscopy micrographs of C<sub>6</sub>-Nap-ICA 6, C<sub>3</sub>-Nap-ICA 7 or C<sub>0</sub>-Nap-ICA 8 (all 100 µM) in PBS (50 mM, pH 7.4, 1% TFE) with green fluorescence filter ( $\lambda_{\text{ex}} = 470/40 \text{ nm}$ ,  $\lambda_{\text{em}} = 525/50 \text{ nm}$ ) and brightfield, scale bar = 40 µm.

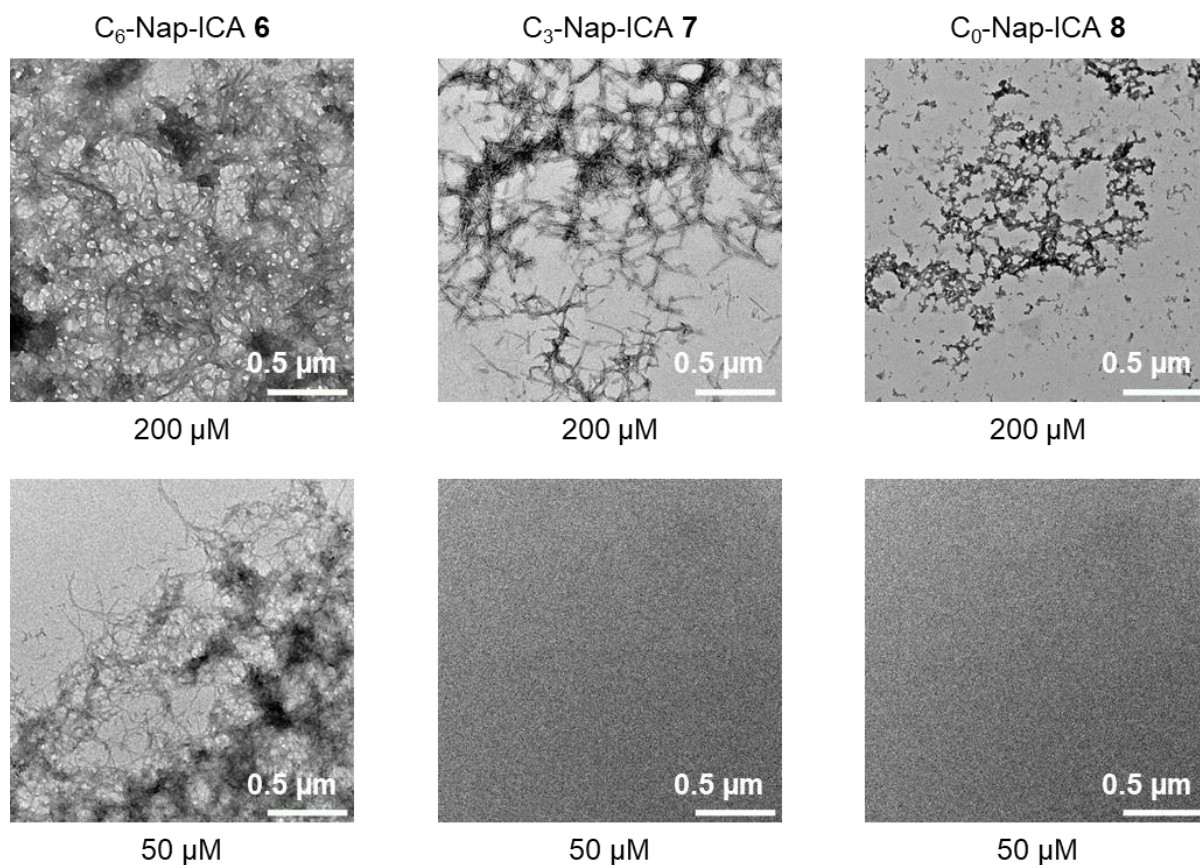

Figure S38: TEM micrographs of C<sub>6</sub>-Nap-ICA **6**, C<sub>3</sub>-Nap-ICA **7** and C<sub>0</sub>-Nap-ICA **8** (200/50 μM) in PBS (50 mM, pH 7.4, 1% TFE) after 24 h incubation at room temperature. The structures were stained with uranyl(IV) acetate (4%), scale bar = 0.5 μm.

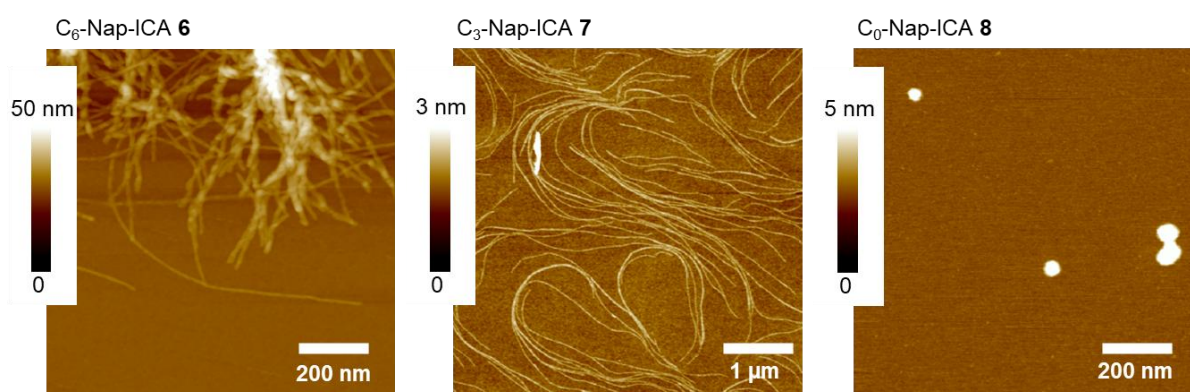

Figure S39: AFM images of supramolecular structures formed by C<sub>6</sub>-Nap-ICA **6**, C<sub>3</sub>-Nap-ICA **7**, C<sub>0</sub>-Nap-ICA **8** samples at 100 μM in MilliQ-H<sub>2</sub>O (1% TFE) after 24 h incubation at room temperature.

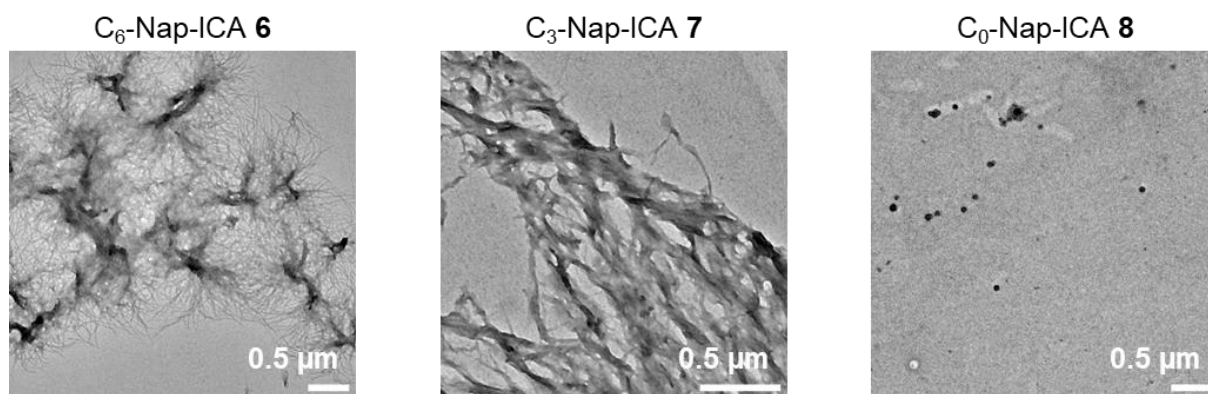

Figure S40: TEM micrographs of C<sub>6</sub>-Nap-ICA **6**, C<sub>3</sub>-Nap-ICA **7** and C<sub>0</sub>-Nap-ICA **8** (100 μM) in MilliQ-H<sub>2</sub>O (1% TFE) after 24 h incubation at room temperature. The structures were stained with uranyl(IV) acetate (4%), scale bar = 0.5 μm.

### 3.4 Circular dichroism (CD) spectroscopy

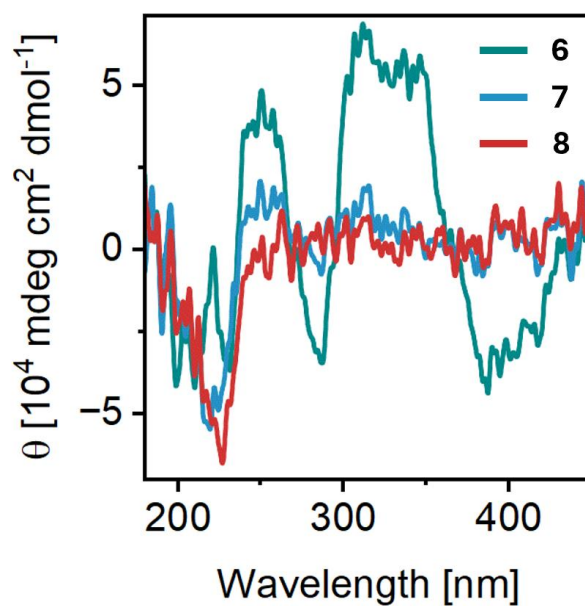

Figure S41: Circular dichroism spectra of C<sub>6</sub>-Nap-ICA **6**, C<sub>3</sub>-Nap-ICA **7** and C<sub>0</sub>-Nap-ICA **8** (all 100 μM) in PBS (50 mM, pH 7.4, 1% TFE). The molar ellipticity is plotted against the wavelength.

## 4 NMR study with increasing TFE content

To investigate the self-assembly propensity of the three peptide conjugates, the compounds were dissolved in mixtures of trifluoroethanol- $d_3$  and PBS-buffered  $D_2O$  with increasing TFE- $d_3$  content (1:99, 10:90, 20:80, 30:70, 40:60, 50:50, and 100:0, v/v) and analyzed by  $^1H$  NMR spectroscopy.

The aqueous component of the solvent mixtures was prepared by lyophilizing 40 mL of commercial PBS to dryness and redissolving the residue in the same volume of  $D_2O$ . Dimethyl sulfone (DMS, 6.96 mg) was added as an internal reference. Each peptide conjugate was initially dissolved in TFE- $d_3$ , followed by the addition of the DMS-containing PBS/ $D_2O$  buffer (250  $\mu$ L) and additional PBS/ $D_2O$  buffer without DMS to achieve the desired solvent compositions. The exact volumes used are summarized in Table S1.

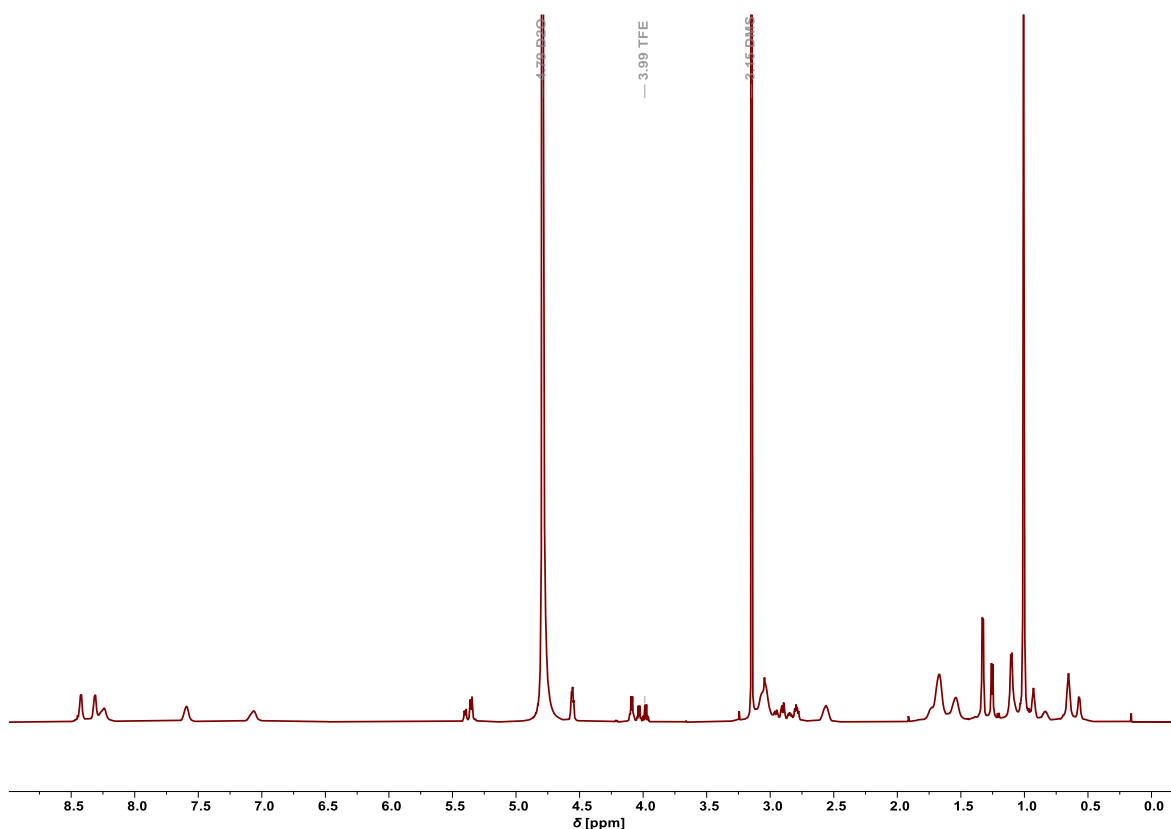

Figure S42:  $^1H$  NMR (700 MHz, 298 K,  $D_2O/TFE-d_3$  99:1) spectrum of  $C_0$ -Nap-ICA **8**.

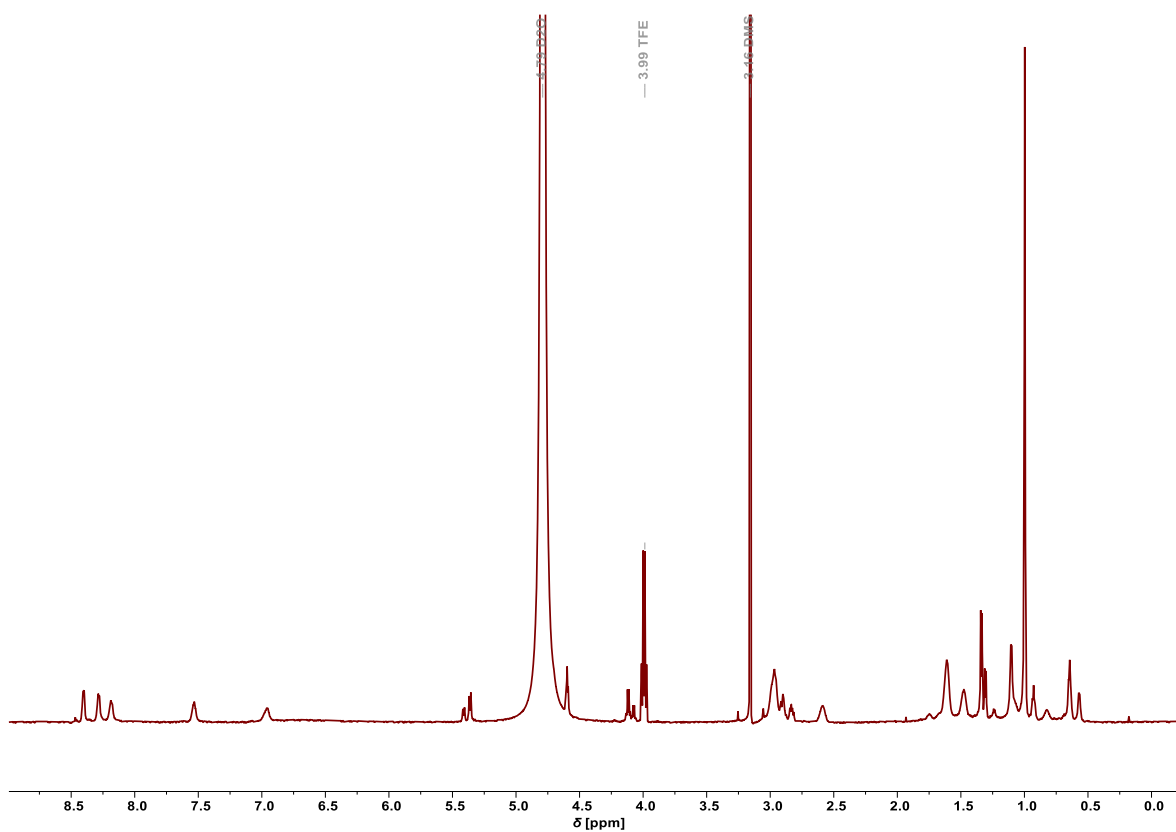

Figure S43: <sup>1</sup>H NMR (700 MHz, 298 K, D<sub>2</sub>O/TFE-*d*<sub>3</sub> 90:10) spectrum of C<sub>0</sub>-Nap-ICA **8**.

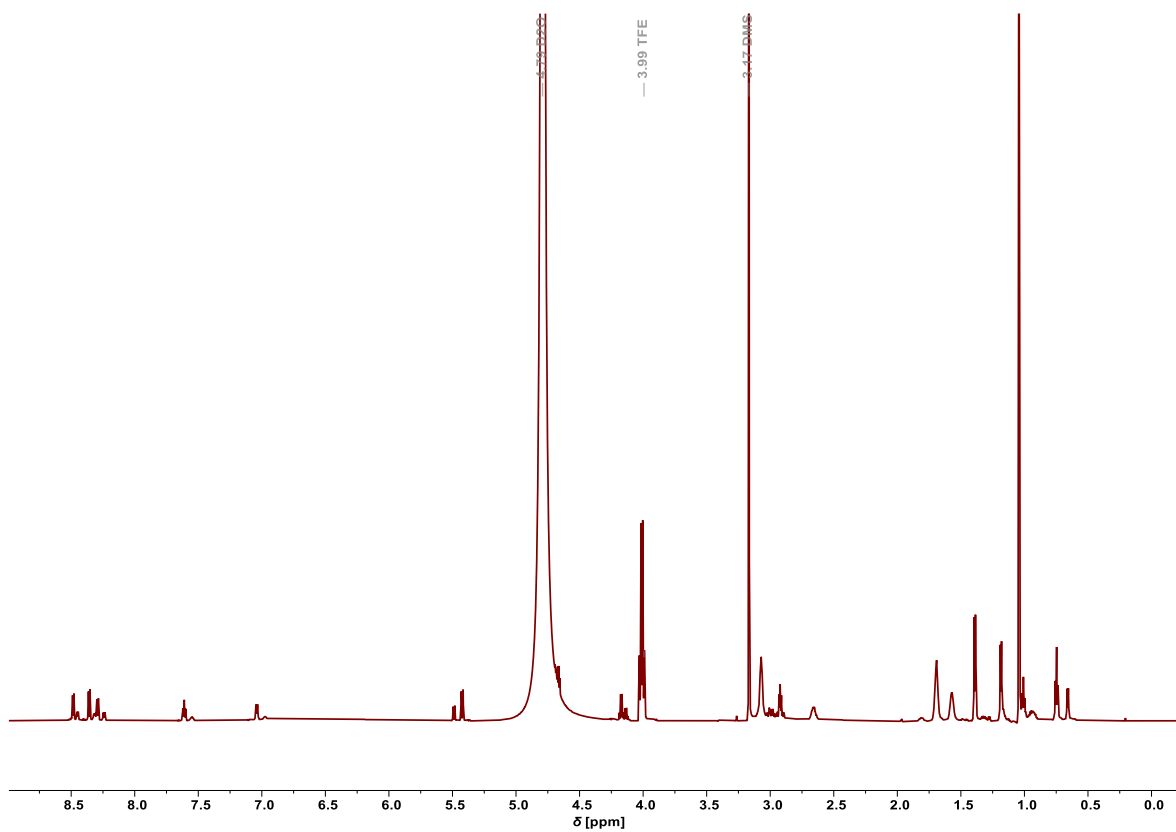

Figure S44: <sup>1</sup>H NMR (700 MHz, 298 K, D<sub>2</sub>O/TFE-*d*<sub>3</sub> 80:20) spectrum of C<sub>0</sub>-Nap-ICA **8**.

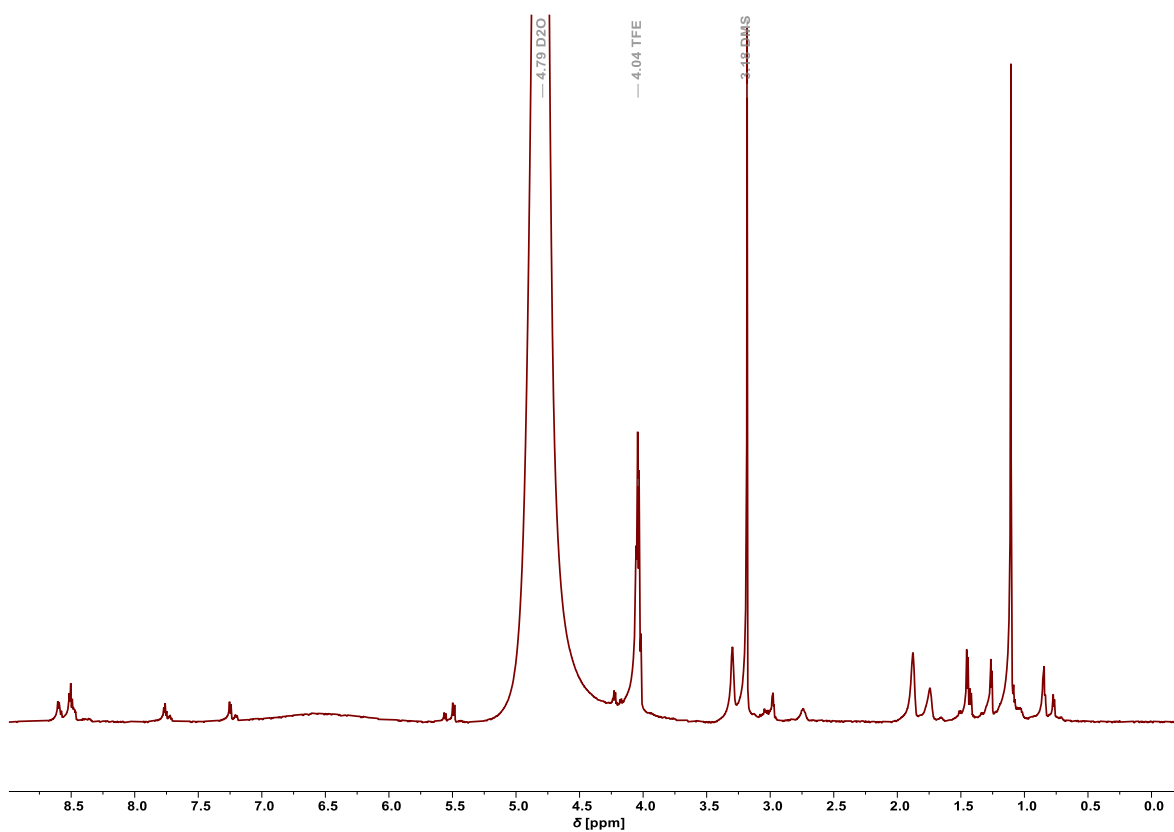

Figure S45: <sup>1</sup>H NMR (700 MHz, 298 K, D<sub>2</sub>O/TFE-*d*<sub>3</sub> 70:30) spectrum of C<sub>0</sub>-Nap-ICA **8**.

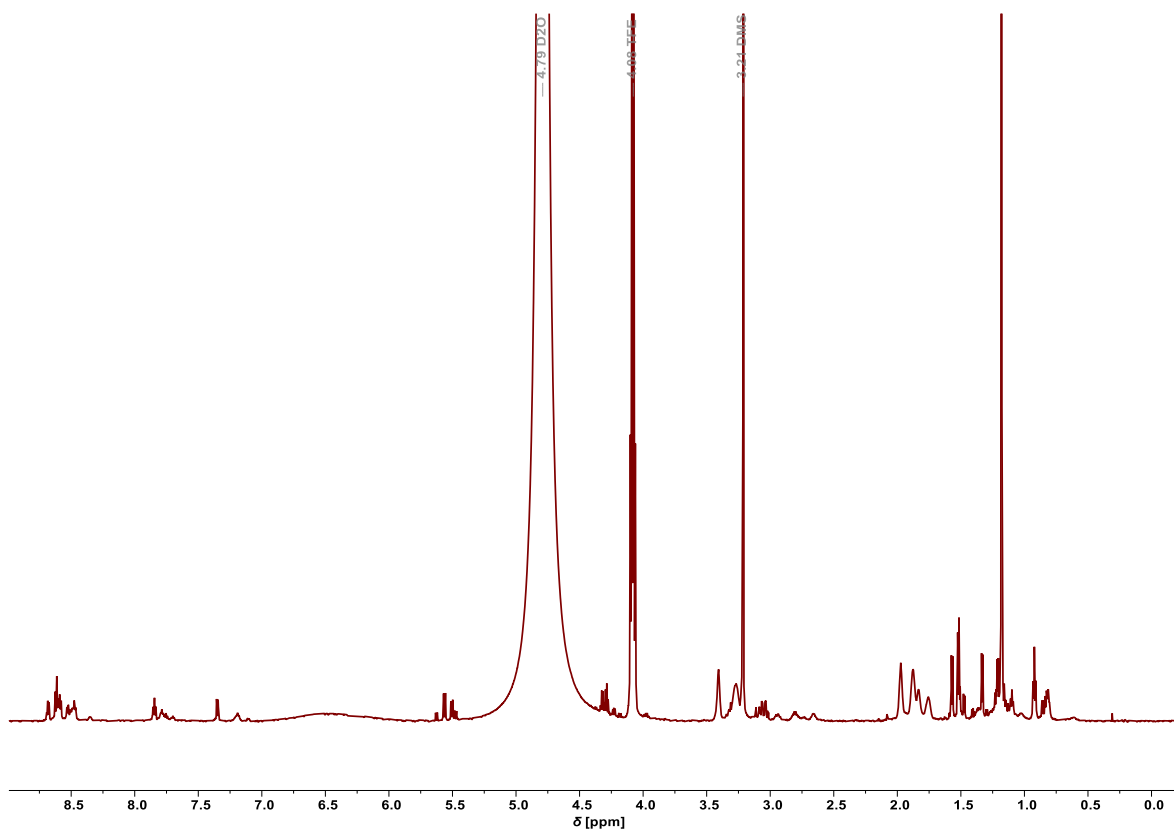

Figure S46: <sup>1</sup>H NMR (700 MHz, 298 K, D<sub>2</sub>O/TFE-*d*<sub>3</sub> 60:40) spectrum of C<sub>0</sub>-Nap-ICA **8**.

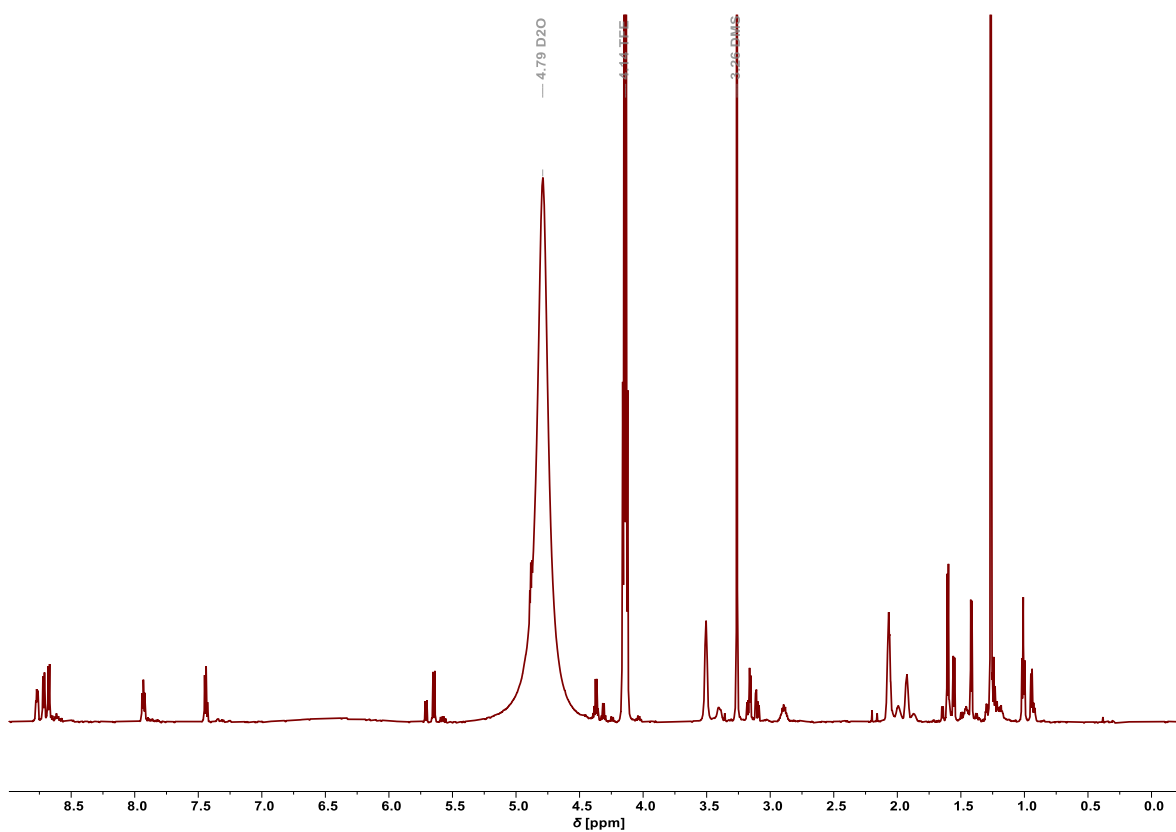

Figure S47: <sup>1</sup>H NMR (700 MHz, 298 K, D<sub>2</sub>O/TFE-*d*<sub>3</sub> 50:50) spectrum of C<sub>0</sub>-Nap-ICA **8**.

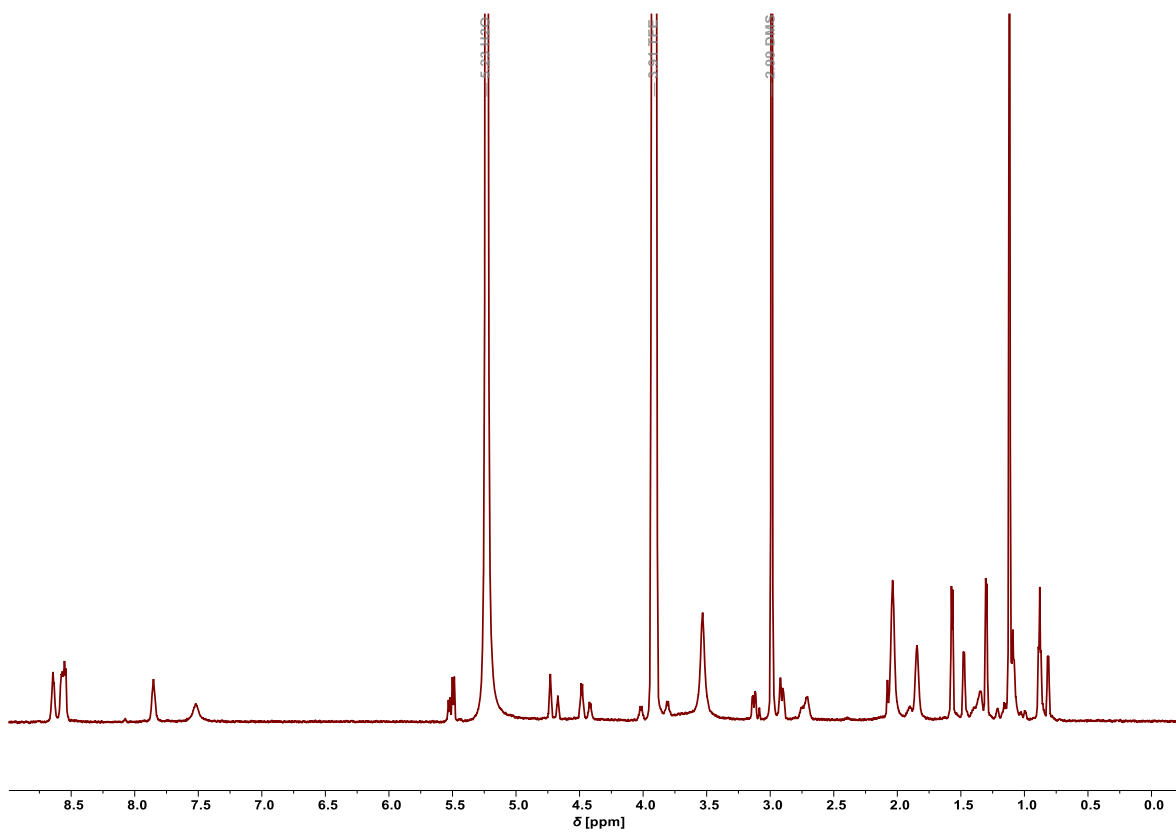

Figure S48: <sup>1</sup>H NMR (700 MHz, 298 K, TFE-*d*<sub>3</sub>) spectrum of C<sub>0</sub>-Nap-ICA **8**.

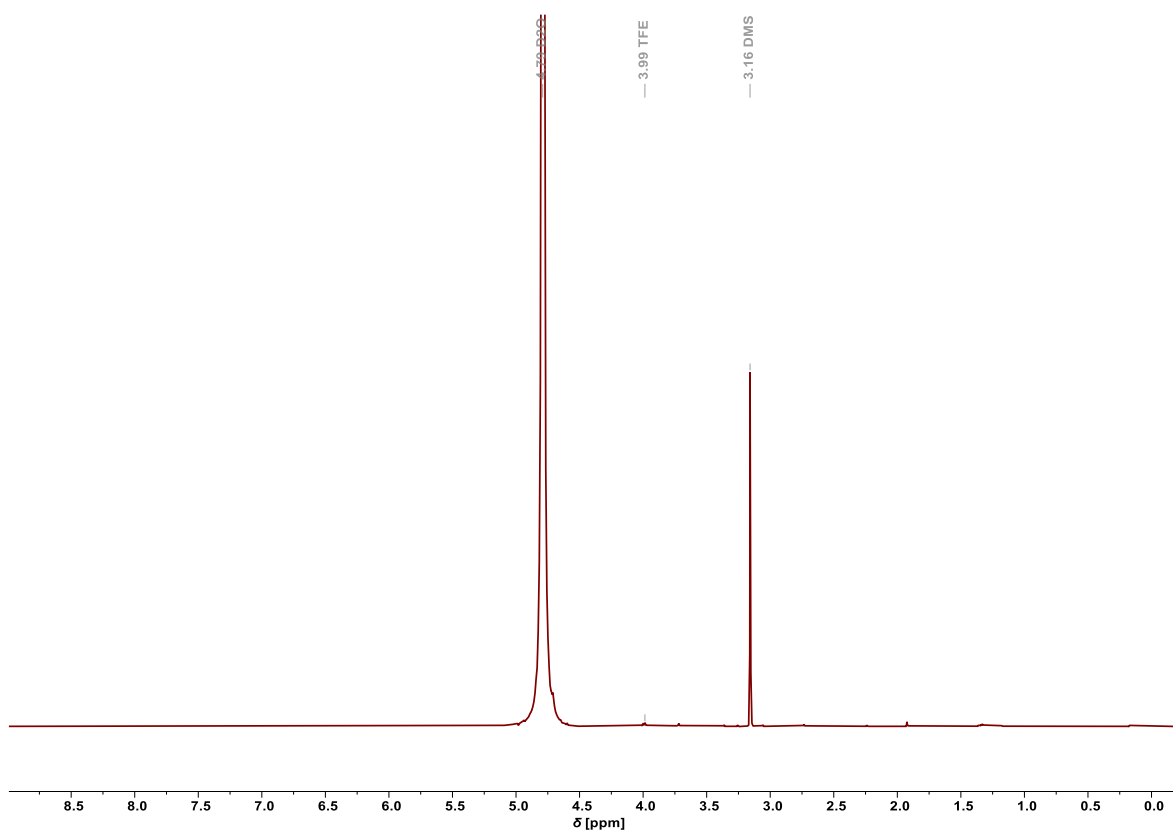

Figure S49:  $^1\text{H}$  NMR (700 MHz, 298 K,  $\text{D}_2\text{O}/\text{TFE-}d_3$  99:1) spectrum of  $\text{C}_3\text{-Nap-ICA 7}$ .

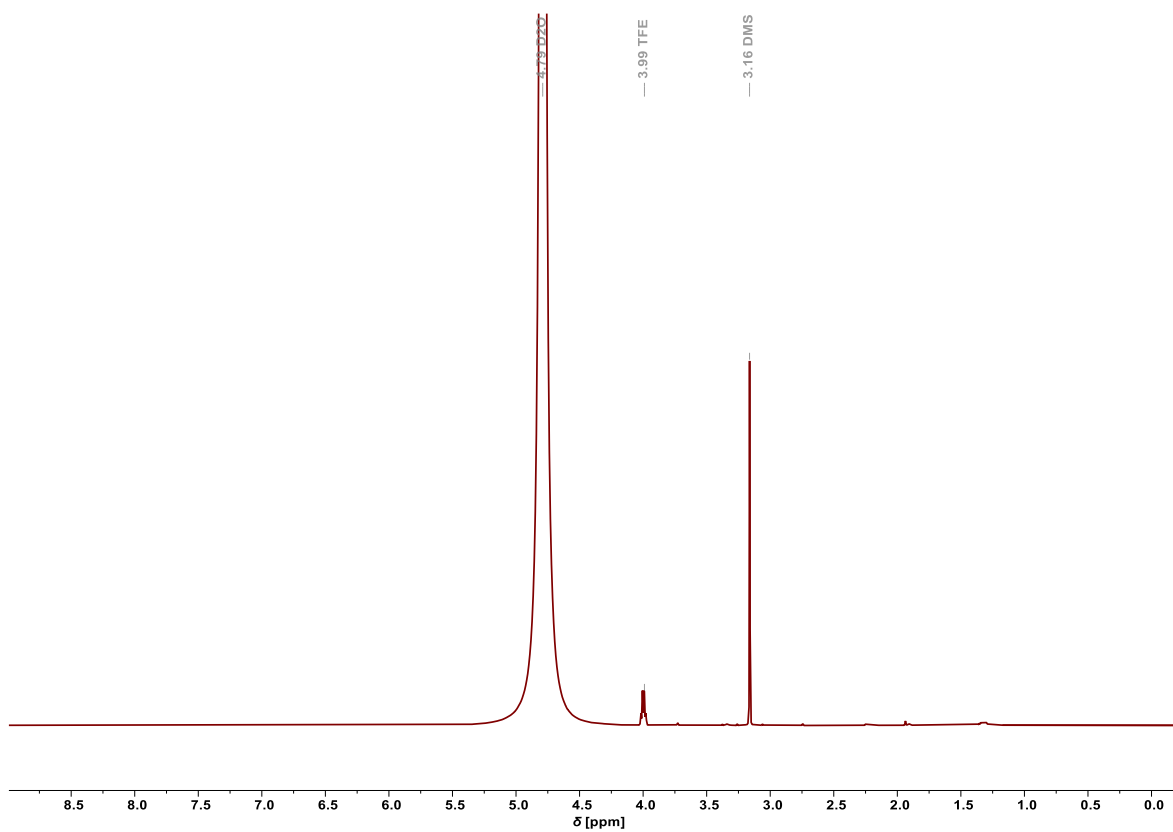

Figure S50:  $^1\text{H}$  NMR (700 MHz, 298 K,  $\text{D}_2\text{O}/\text{TFE-}d_3$  90:10) spectrum of  $\text{C}_3\text{-Nap-ICA 7}$ .

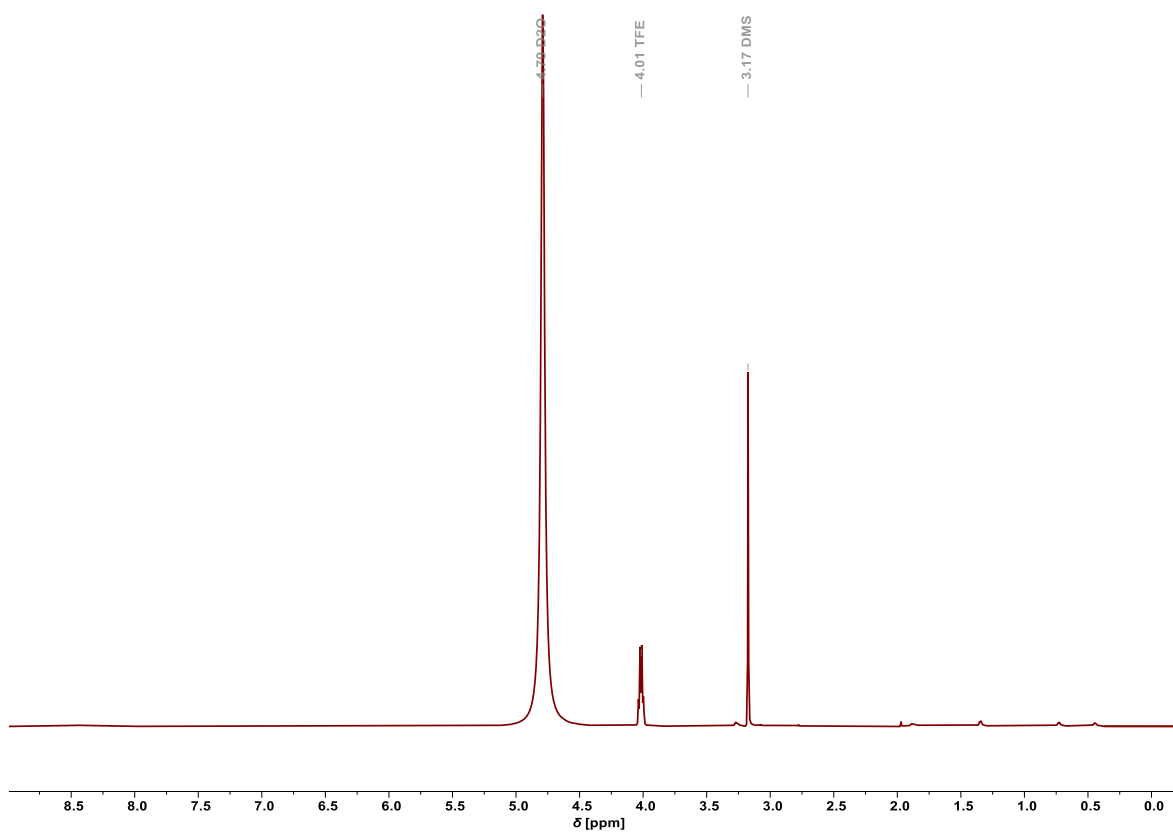

Figure S51:  $^1\text{H}$  NMR (700 MHz, 298 K,  $\text{D}_2\text{O}/\text{TFE}-d_3$  80:20) spectrum of  $\text{C}_3\text{-Nap-ICA 7}$ .

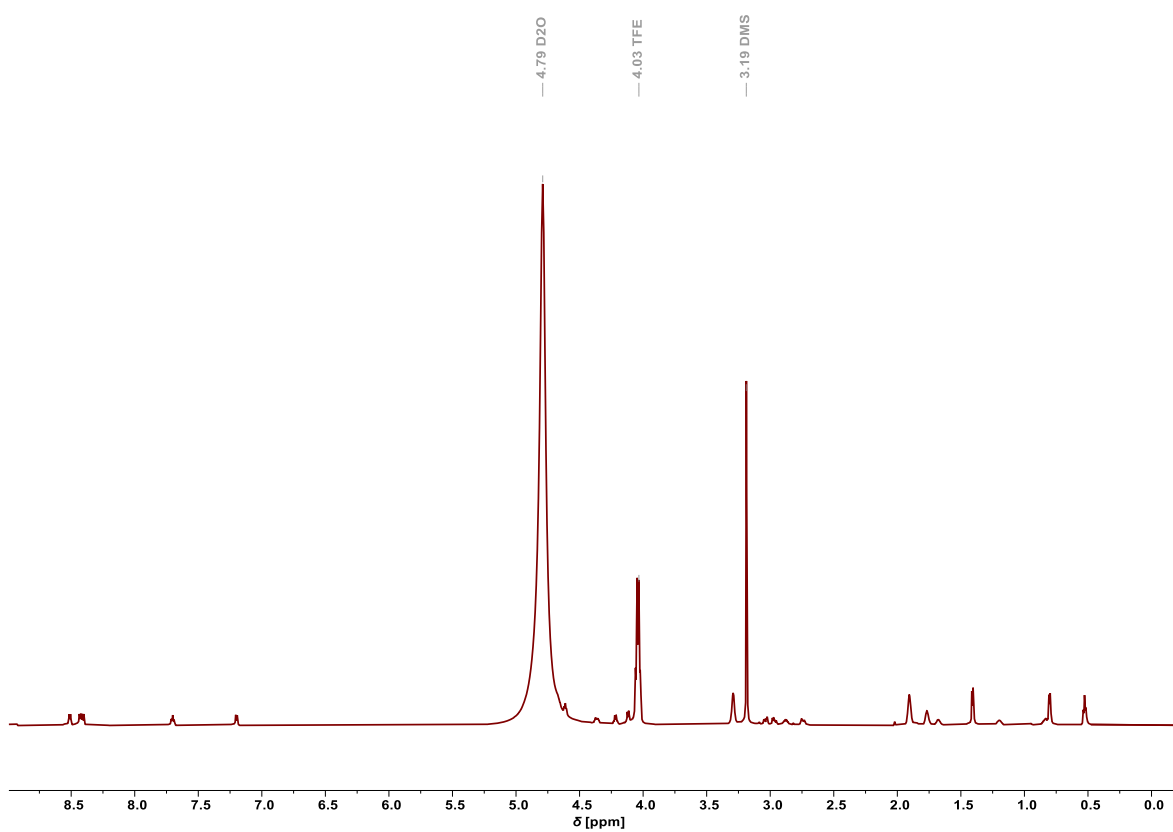

Figure S52:  $^1\text{H}$  NMR (700 MHz, 298 K,  $\text{D}_2\text{O}/\text{TFE}-d_3$  70:30) spectrum of  $\text{C}_3\text{-Nap-ICA 7}$ .

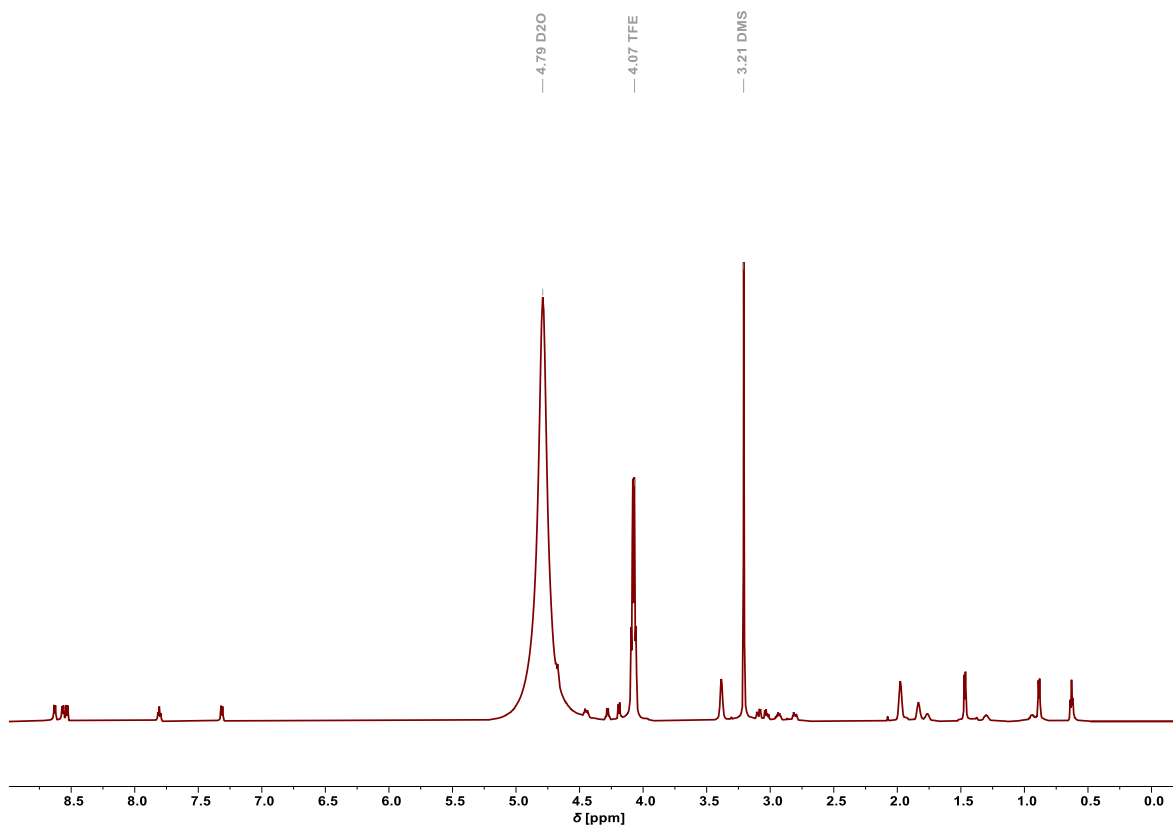

Figure S53: <sup>1</sup>H NMR (700 MHz, 298 K, D<sub>2</sub>O/TFE-*d*<sub>3</sub> 60:40) spectrum of C<sub>3</sub>-Nap-ICA 7.

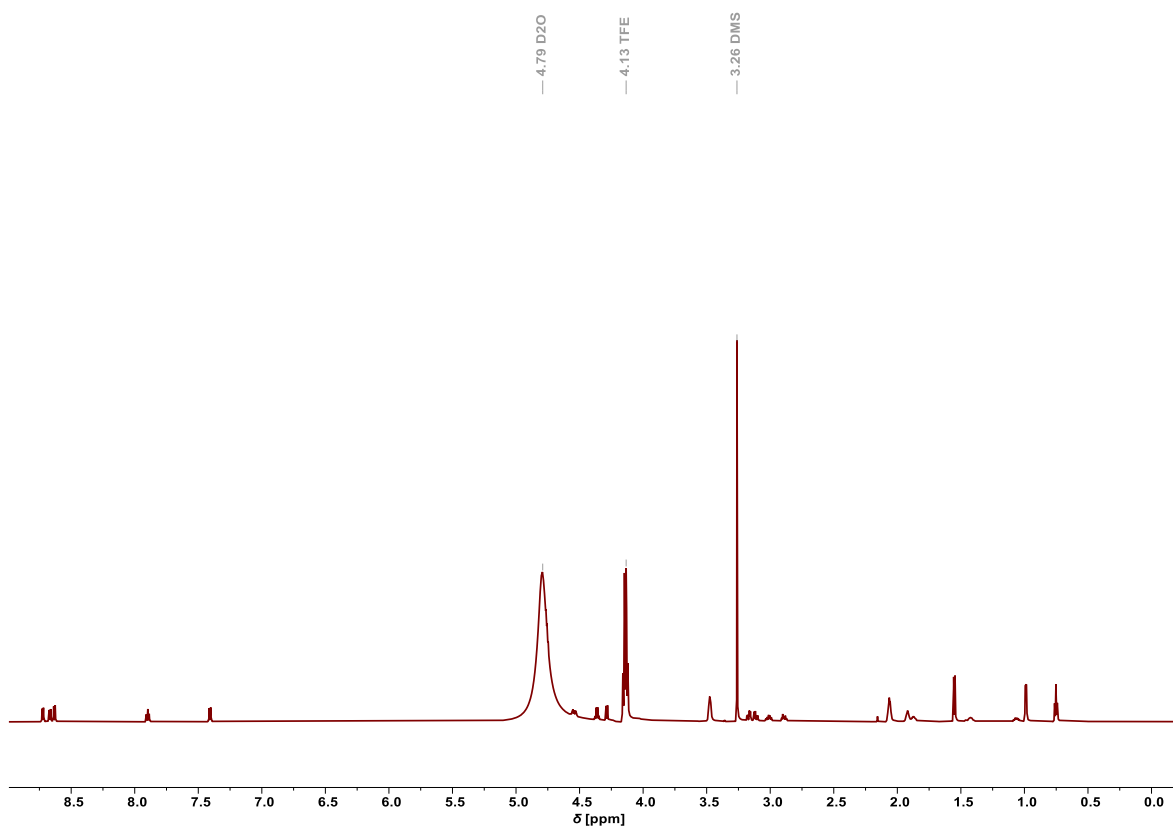

Figure S54: <sup>1</sup>H NMR (700 MHz, 298 K, D<sub>2</sub>O/TFE-*d*<sub>3</sub> 50:50) spectrum of C<sub>3</sub>-Nap-ICA 7.

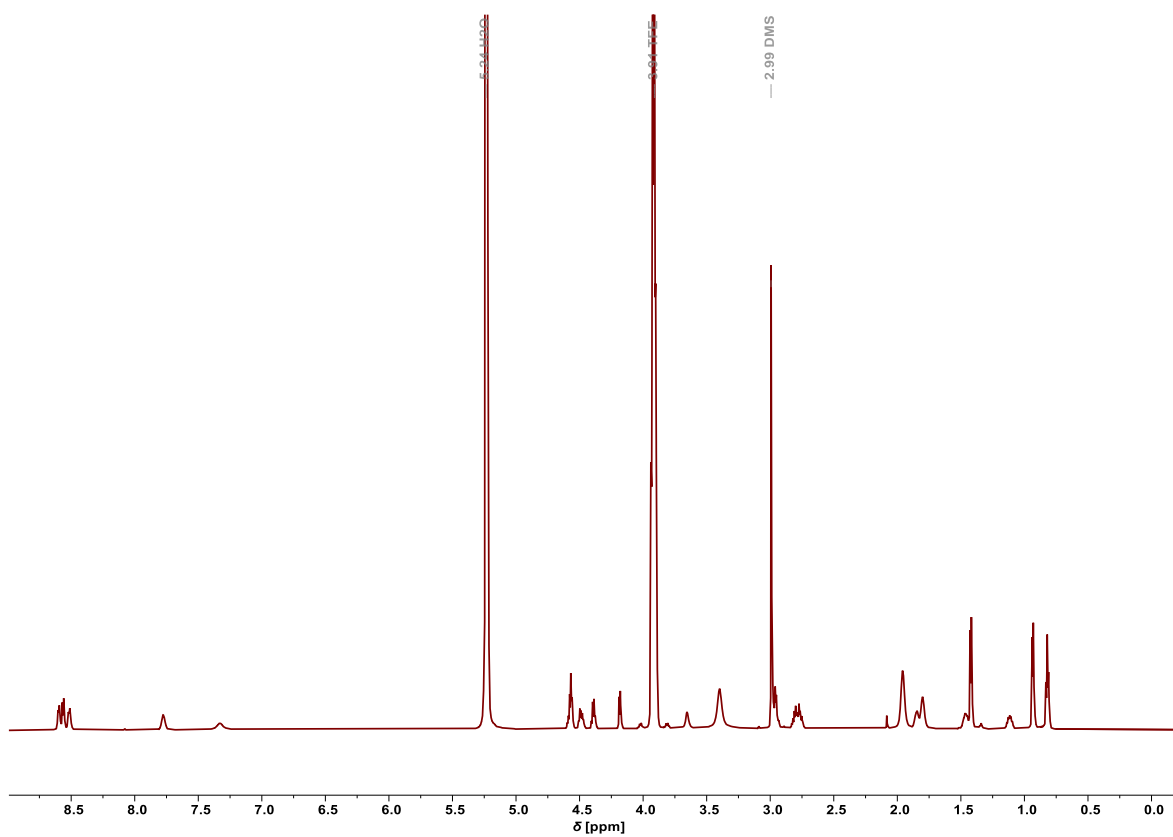

Figure S55:  $^1\text{H}$  NMR (700 MHz, 298 K,  $\text{TFE-}d_3$ ) spectrum of  $\text{C}_3\text{-Nap-ICA 7}$ .

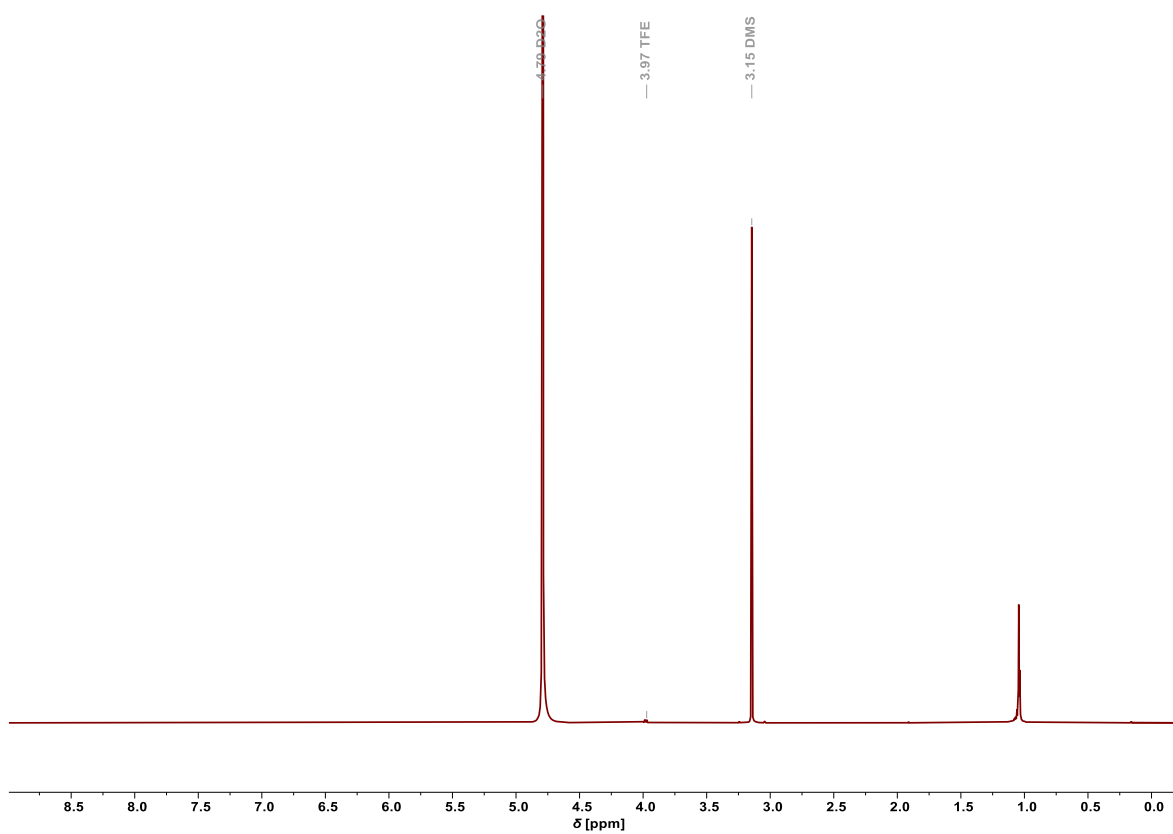

Figure S56:  $^1\text{H}$  NMR (700 MHz, 298 K,  $\text{D}_2\text{O/TFE-}d_3$  99:1) spectrum of  $\text{C}_6\text{-Nap-ICA 6}$ .

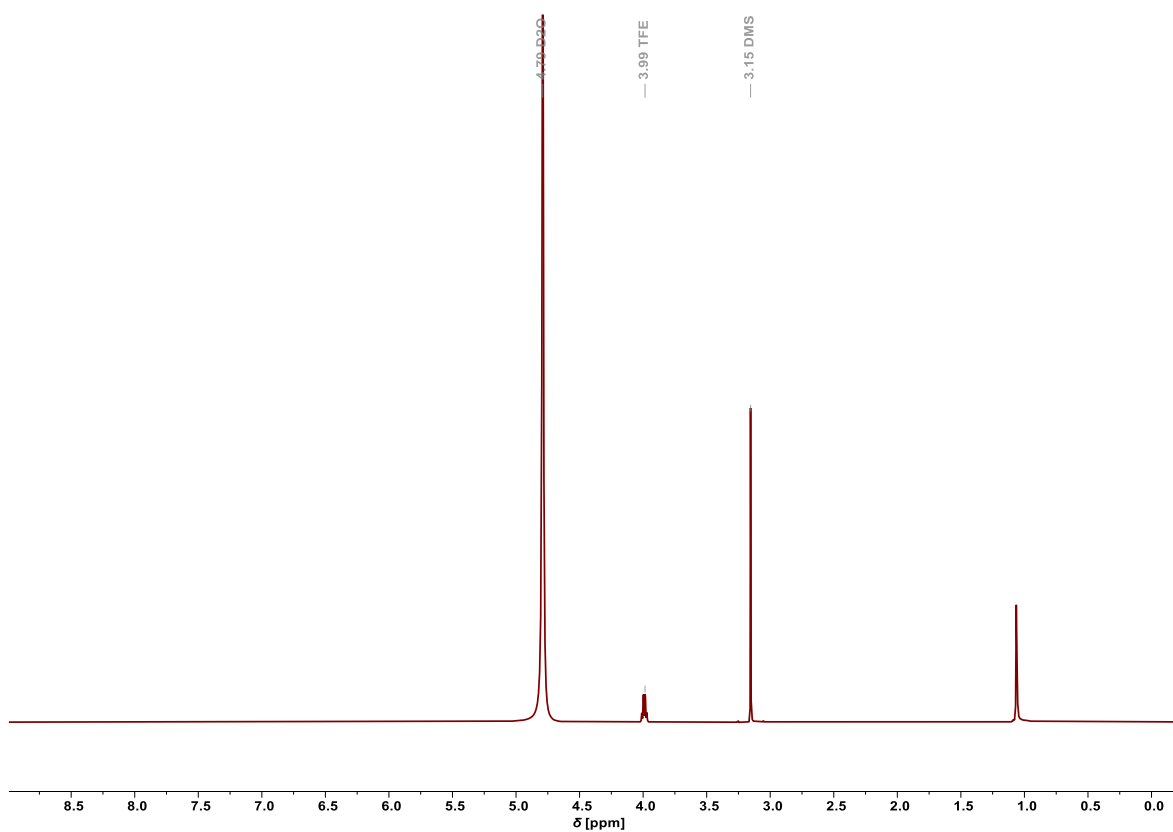

Figure S57:  $^1\text{H}$  NMR (700 MHz, 298 K,  $\text{D}_2\text{O}/\text{TFE}-d_3$  90:10) spectrum of  $\text{C}_6\text{-Nap-ICA 6}$ .

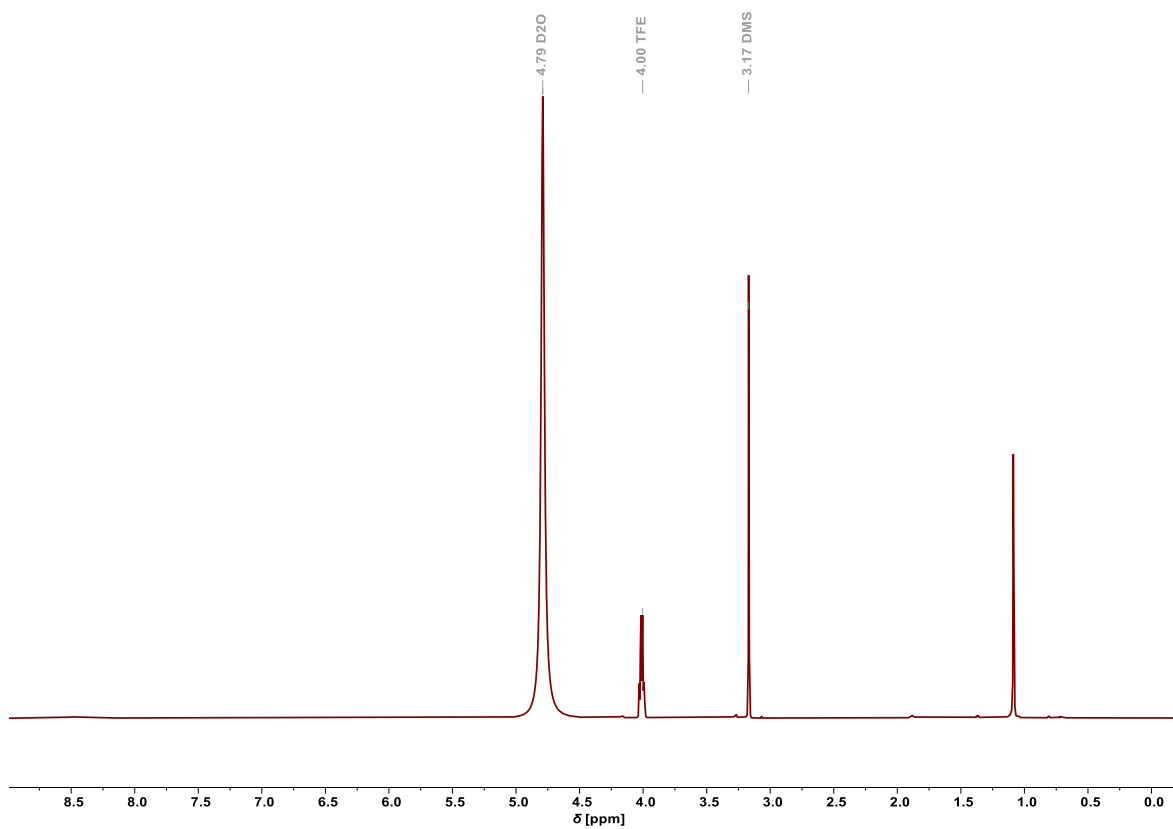

Figure S58:  $^1\text{H}$  NMR (700 MHz, 298 K,  $\text{D}_2\text{O}/\text{TFE}-d_3$  80:20) spectrum of  $\text{C}_6\text{-Nap-ICA 6}$ .

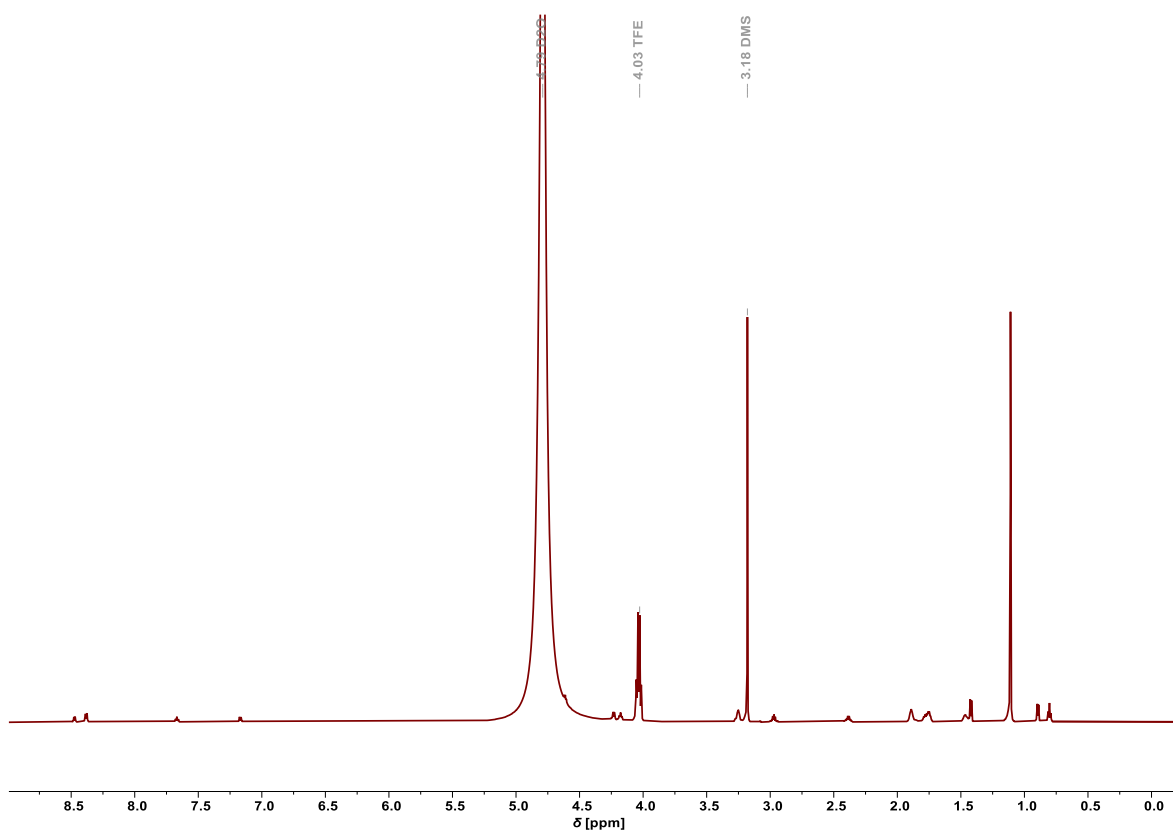

Figure S59: <sup>1</sup>H NMR (700 MHz, 298 K, D<sub>2</sub>O/TFE-*d*<sub>3</sub> 70:30) spectrum of C<sub>6</sub>-Nap-ICA **6**.

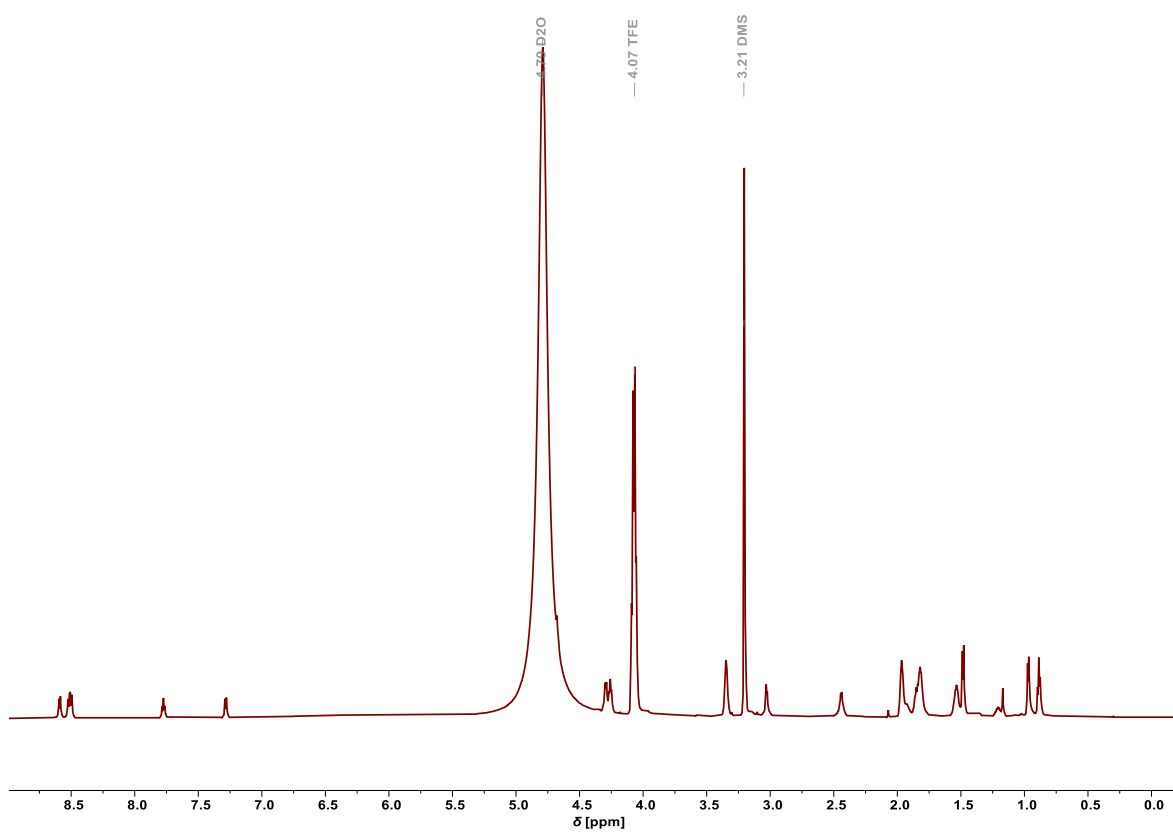

Figure S60: <sup>1</sup>H NMR (700 MHz, 298 K, D<sub>2</sub>O/TFE-*d*<sub>3</sub> 60:40) spectrum of C<sub>6</sub>-Nap-ICA **6**.

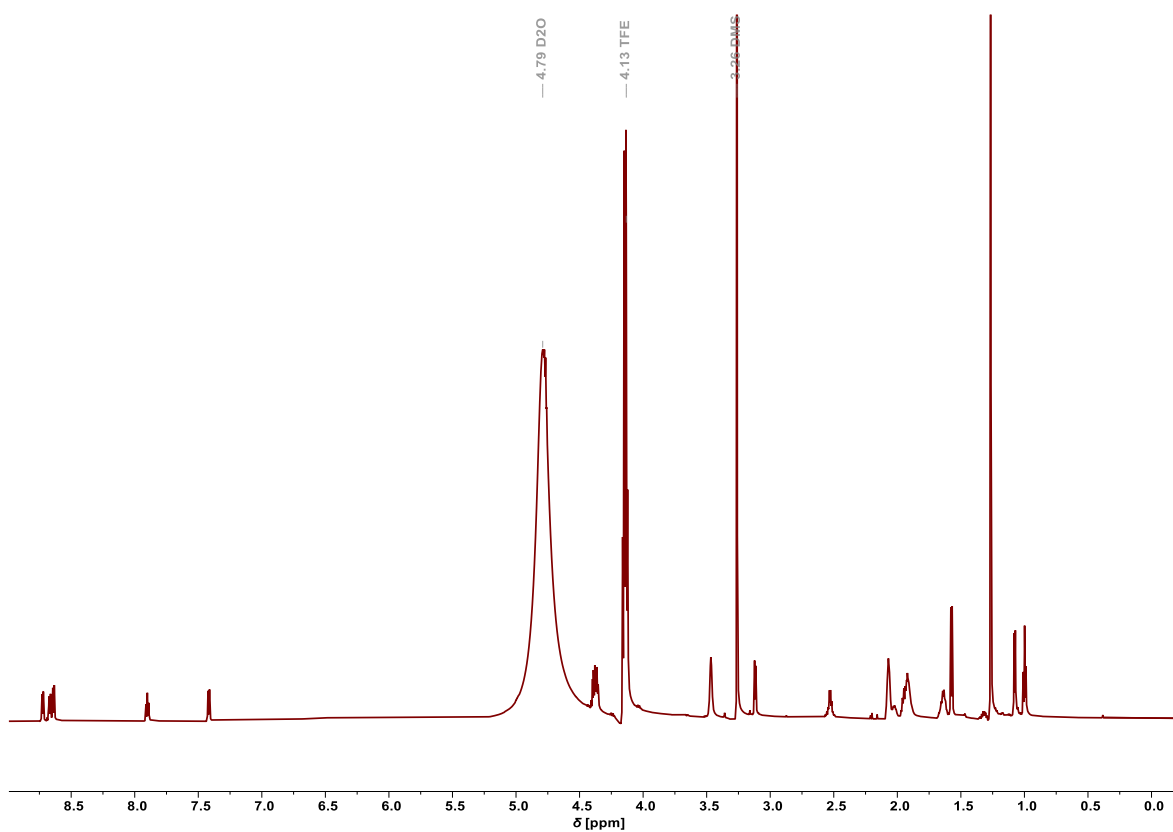

Figure S61:  $^1\text{H}$  NMR (700 MHz, 298 K,  $\text{D}_2\text{O}/\text{TFE-}d_3$  50:50) spectrum of  $\text{C}_6\text{-Nap-ICA 6}$ .

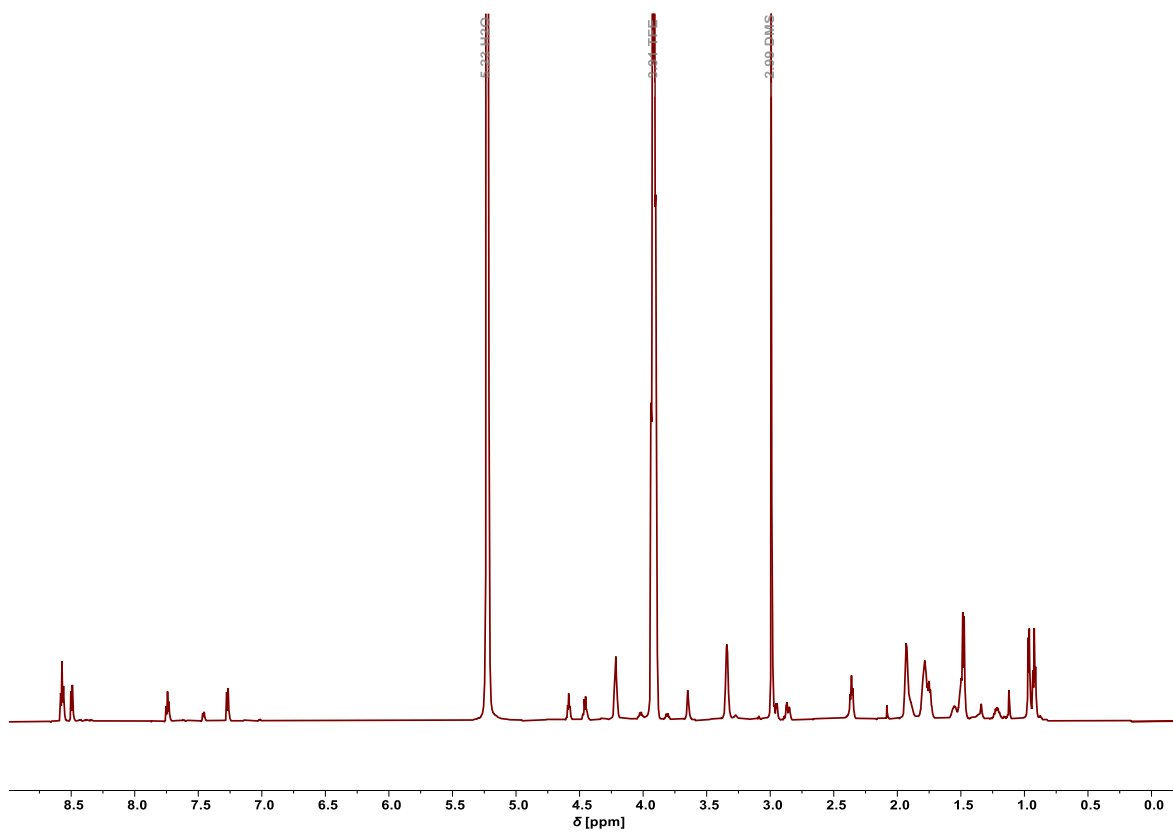

Figure S62:  $^1\text{H}$  NMR (700 MHz, 298 K,  $\text{TFE-}d_3$ ) spectrum of  $\text{C}_6\text{-Nap-ICA 6}$ .

Table S1: Masses and amounts of peptides and masses of solvents for NMR experiment with increasing TFE- $d_3$  contents

| Compound and %<br>TFE                 | $m$ [ug] | $n$ [ $\mu$ mol] | $m_{TFE}$ [mg] | $m_{DMS-buffer}$ [mg] | $m_{noDMS-buffer}$ [mg] |
|---------------------------------------|----------|------------------|----------------|-----------------------|-------------------------|
| C <sub>0</sub> -Nap-ICA <b>8</b> 1%   | 497      | 0.874            | 6.3            | 275.3                 | 273.3                   |
| C <sub>0</sub> -Nap-ICA <b>8</b> 10%  | 493      | 0.867            | 66.2           | 276.2                 | 217.8                   |
| C <sub>0</sub> -Nap-ICA <b>8</b> 20%  | 500      | 0.879            | 132.5          | 275.9                 | 162.5                   |
| C <sub>0</sub> -Nap-ICA <b>8</b> 30%  | 466      | 0.819            | 198.4          | 277.7                 | 110.8                   |
| C <sub>0</sub> -Nap-ICA <b>8</b> 40%  | 512      | 0.900            | 267.3          | 277.6                 | 53.4                    |
| C <sub>0</sub> -Nap-ICA <b>8</b> 50%  | 504      | 0.886            | 350.0          | 276.0                 | 0                       |
| C <sub>0</sub> -Nap-ICA <b>8</b> 100% | 508      | 0.893            | 702.3          | 0                     | 0                       |
| C <sub>3</sub> -Nap-ICA <b>7</b> 1%   | 482      | 0.753            | 6.3            | 277.1                 | 264.8                   |
| C <sub>3</sub> -Nap-ICA <b>7</b> 10%  | 475      | 0.742            | 65.9           | 276.1                 | 217.1                   |
| C <sub>3</sub> -Nap-ICA <b>7</b> 20%  | 460      | 0.719            | 132.7          | 275.9                 | 164.7                   |
| C <sub>3</sub> -Nap-ICA <b>7</b> 30%  | 466      | 0.728            | 198.3          | 276.1                 | 110.2                   |
| C <sub>3</sub> -Nap-ICA <b>7</b> 40%  | 468      | 0.731            | 264.5          | 276.3                 | 55.3                    |
| C <sub>3</sub> -Nap-ICA <b>7</b> 50%  | 488      | 0.763            | 329.8          | 277.7                 | 0                       |
| C <sub>3</sub> -Nap-ICA <b>7</b> 100% | 528      | 0.825            | 711.4          | 0                     | 0                       |
| C <sub>6</sub> -Nap-ICA <b>6</b> 1%   | 514      | 0.754            | 6.1            | 275.1                 | 272.1                   |
| C <sub>6</sub> -Nap-ICA <b>6</b> 10%  | 524      | 0.769            | 62.9           | 277.0                 | 198.8                   |
| C <sub>6</sub> -Nap-ICA <b>6</b> 20%  | 534      | 0.784            | 133.0          | 277.7                 | 163.0                   |
| C <sub>6</sub> -Nap-ICA <b>6</b> 30%  | 528      | 0.775            | 199.3          | 278.6                 | 110.0                   |
| C <sub>6</sub> -Nap-ICA <b>6</b> 40%  | 480      | 0.705            | 264.8          | 278.0                 | 53.4                    |
| C <sub>6</sub> -Nap-ICA <b>6</b> 50%  | 536      | 0.787            | 353.7          | 274.1                 | 0                       |
| C <sub>6</sub> -Nap-ICA <b>6</b> 100% | 507      | 0.744            | 708.9          | 0                     | 0                       |

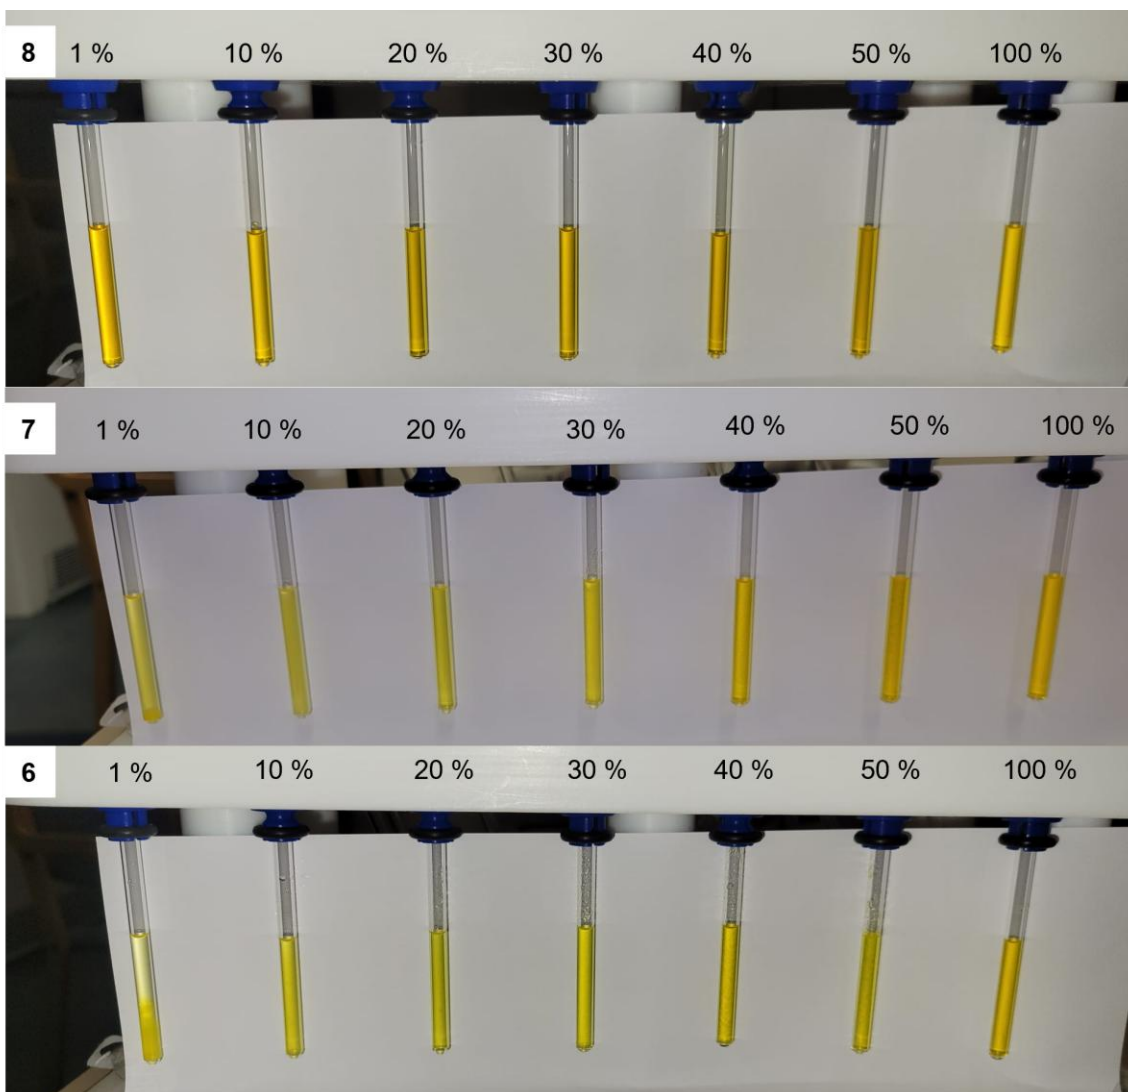

Figure S63: Photographs of the respective NMR tubes of the three peptide conjugates C<sub>0</sub>-Nap-ICA **8** (top), C<sub>3</sub>-Nap-ICA **7** (middle) and C<sub>6</sub>-Nap-ICA **6** (bottom) with different TFE-*d*<sub>3</sub> contents.

## References

- [1] Atherton, E.; Fox, H.; Harkiss, D.; Logan, C. J.; Sheppard, R. C.; Williams, B. J. *Journal of the Chemical Society, Chemical Communications* **1978**, No. 13, 537–539. doi:10.1039/C39780000537
- [2] Li, L.; Wu, Y.; Li, E.; Shen, C.; Zhang, H.; Xu, X.; Wu, G.; Cai, M.; Zhu, W.-H. *Chemical Communications* **2019**, *55*, 13239–13242. doi:10.1039/C9CC06345E
- [3] Mata, M. A.; Satterly, N.; Versteeg, G. A.; Frantz, D.; Wei, S.; Williams, N.; Schmolke, M.; Peña-Llopis, S.; Brugarolas, J.; Forst, C. V.; White, M. A.; García-Sastre, A.; Roth, M. G.; Fontoura, B. M. A. *Nature Chemical Biology* **2011**, *7*, 712–719. doi:10.1038/nchembio.645
